# Supplementary material for: Access to 2-naphthols via Ru(ii)-catalyzed C–H annulation of nitrones with α-diazo sulfonyl ketones
Source: Royal Society of Chemistry journal article supplement (doi:10.1039/c9cc02949d), 2019-01-01

*Electronic Supplementary Information*

**Access to 2-Naphthols via Ru(II)-Catalyzed C-H Annulation of Nitrones with  $\alpha$ -Diazo Sulfonyl Ketones**

Lingheng Kong, Xi Han, Xingwei Li\*

Key Laboratory of Applied Surface and Colloid Chemistry of MOE, School of Chemistry and  
Chemical Engineering, Shaanxi Normal University, Xi'an 710062, China

e-mail: [lixw@snnu.edu.cn](mailto:lixw@snnu.edu.cn)

**Table of Contents**

|                                                         |     |
|---------------------------------------------------------|-----|
| I. General Remarks .....                                | S2  |
| II. Experimental Procedures and Characterizations ..... | S2  |
| III. Derivatization Reaction .....                      | S13 |
| IV. Mechanistic Studies .....                           | S14 |
| V. Reference .....                                      | S19 |
| VI. NMR Spectra .....                                   | S20 |

## I. General Remarks

All chemicals were obtained from commercial sources and were used as received unless otherwise noted. All reactions were carried out using Schlenk techniques or in a nitrogen-filled glovebox. NMR spectra were recorded on a 600 MHz NMR spectrometer in the solvent indicated. The chemical shift is given in dimensionless  $\delta$  values and is frequency referenced relative to TMS in  $^1\text{H}$  and  $^{13}\text{C}$  NMR spectroscopy. HRMS data were obtained on a Thermo Scientific LTQ Orbitrap Discovery spectrometer (Bremen, Germany). Column chromatography was performed on silica gel (300-400 mesh) using ethyl acetate/hexanes. Aryl nitrones<sup>1</sup> and  $\alpha$ -diazo sulfonyl ketones<sup>2</sup> were prepared according to literature reports.

## II. Experimental Procedures and Characterizations

A mixture of aryl nitronone (**1**, 0.3 mmol),  $\alpha$ -diazo sulfonyl ketone (**2**, 0.2 mmol),  $[\text{Ru}(p\text{-cymene})\text{Cl}_2]_2$  (5.0 mol %),  $\text{AgNTf}_2$  (20.0 mol %),  $\text{AgPF}_6$  (20.0 mol %), PivOH (2.0 equiv), and DCE (2.0 mL) were charged into a pressure tube. The reaction mixture was stirred under  $\text{N}_2$  at 120 °C for 16 h. After the solvent was removed under reduced pressure, the residue was purified by silica gel chromatography using PE/EA (25:1) to afford the product **3**.

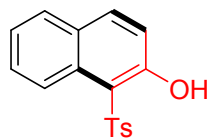

### 1-Tosyl-naphthalen-2-ol (**3aa**)

**3aa** was obtained according to the general procedure in 79% yield (47.1 mg), white solid, mp = 123.6-125.3 °C,  $R_f$  = 0.25 (hexanes/ethyl acetate = 15/1).

$^1\text{H}$  NMR (600 MHz,  $\text{CDCl}_3$ )  $\delta$  11.14 (s, 1H), 8.34 (d,  $J$  = 8.5 Hz, 1H), 7.91 (d,  $J$  = 9.0 Hz, 1H), 7.86 – 7.80 (m, 2H), 7.71 (d,  $J$  = 8.0 Hz, 1H), 7.47 – 7.44 (m, 1H), 7.34 – 7.31 (m, 1H), 7.26 (d,  $J$  = 8.0 Hz, 2H), 7.17 (d,  $J$  = 9.0 Hz, 1H), 2.35 (s, 3H).  $^{13}\text{C}$  NMR (151 MHz,  $\text{CDCl}_3$ )  $\delta$  158.9, 144.8, 139.4, 137.5, 130.0, 129.7, 129.2, 128.9, 128.8, 126.8, 124.5, 123.2, 120.4, 112.3, 21.7. HRMS:  $m/z$ :  $[\text{M} + \text{H}]^+$  calculated for  $\text{C}_{17}\text{H}_{15}\text{O}_3\text{S}^+$ : 299.0736, found 299.0736.

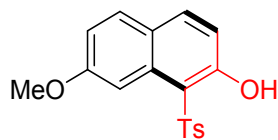

### 7-Methoxy-1-tosyl-naphthalen-2-ol (**3ba**)

**3ba** was obtained according to the general procedure in 66% yield (43.1 mg), white solid, mp = 90.8-91.8 °C,  $R_f$  = 0.25 (hexanes/ethyl acetate = 15/1).

$^1\text{H}$  NMR (600 MHz,  $\text{CDCl}_3$ )  $\delta$  11.09 (s, 1H), 7.84 - 7.81 (m, 3H), 7.66 (d,  $J$  = 2.4 Hz, 1H), 7.58 (d,  $J$  = 8.8 Hz, 1H), 7.27 (d,  $J$  = 8.2 Hz, 2H), 7.02 (d,  $J$  = 9.0 Hz, 1H), 6.94 (dd,  $J$  = 8.8, 2.4 Hz, 1H), 3.80 (s, 3H), 2.37 (s, 3H).  $^{13}\text{C}$  NMR (151 MHz,  $\text{CDCl}_3$ )  $\delta$  159.8, 159.5, 144.8, 139.2, 137.2, 131.4, 130.6, 129.9,

126.8, 124.0, 117.5, 116.3, 111.3, 103.3, 55.5, 21.8. HRMS: m/z:  $[M + Na]^+$  calculated for  $C_{18}H_{16}NaO_4S^+$ : 351.0662, found 351.0659.

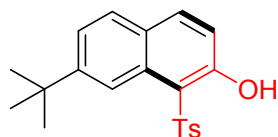

#### 7-(*tert*-Butyl)-1-tosylnaphthalen-2-ol (**3ca**)

**3ca** was obtained according to the general procedure in 74% yield (52.5 mg), white solid, mp = 154.5-155.3 °C,  $R_f$  = 0.30 (hexanes/ethyl acetate = 15/1).

$^1H$  NMR (600 MHz,  $CDCl_3$ )  $\delta$  11.15 (s, 1H), 8.26 (s, 1H), 7.86 – 7.85 (m, 3H), 7.63 (d,  $J$  = 8.5 Hz, 1H), 7.39 (dd,  $J$  = 8.5, 1.8 Hz, 1H), 7.26 (d,  $J$  = 8.1 Hz, 2H), 7.11 (d,  $J$  = 9.0 Hz, 1H), 2.35 (s, 3H), 1.30 (s, 9H).  $^{13}C$  NMR (151 MHz,  $CDCl_3$ )  $\delta$  158.9, 151.7, 144.7, 139.4, 137.0, 129.8, 129.5, 128.7, 127.0, 126.9, 123.0, 119.5, 119.1, 112.2, 35.6, 31.3, 21.7. HRMS: m/z:  $[M + Na]^+$  calculated for  $C_{21}H_{22}NaO_3S^+$ : 377.1182, found 377.1177.

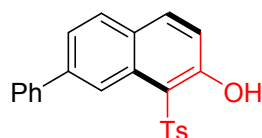

#### 7-Phenyl-1-tosylnaphthalen-2-ol (**3da**)

**3da** was obtained according to the general procedure in 67% yield (50.4 mg), yellow solid, mp = 160.0-161.5 °C,  $R_f$  = 0.25 (hexanes/ethyl acetate = 15/1).

$^1H$  NMR (600 MHz,  $CDCl_3$ )  $\delta$  11.18 (s, 1H), 8.54 (s, 1H), 7.91 (d,  $J$  = 9.0 Hz, 1H), 7.87 (d,  $J$  = 8.0 Hz, 2H), 7.74 (d,  $J$  = 8.3 Hz, 1H), 7.56 (d,  $J$  = 8.3 Hz, 1H), 7.52 (d,  $J$  = 7.6 Hz, 2H), 7.45 (t,  $J$  = 7.6 Hz, 2H), 7.38 (t,  $J$  = 7.4 Hz, 1H), 7.26 (d,  $J$  = 8.0 Hz, 2H), 7.16 (d,  $J$  = 9.0 Hz, 1H), 2.34 (s, 3H).  $^{13}C$  NMR (151 MHz,  $CDCl_3$ )  $\delta$  159.2, 144.9, 141.4, 140.9, 139.4, 137.2, 130.0, 129.9, 129.6, 129.1, 128.0, 127.9, 127.7, 126.9, 124.1, 121.5, 120.3, 112.5, 21.7. HRMS: m/z:  $[M + Na]^+$  calculated for  $C_{23}H_{18}NaO_3S^+$ : 397.0869, found 397.0863.

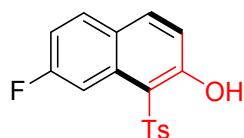

#### 7-Fluoro-1-tosylnaphthalen-2-ol (**3ea**)

**3ea** was obtained according to the general procedure in 51% yield (32.3 mg), yellow solid, mp = 159.5-160.4 °C,  $R_f$  = 0.25 (hexanes/ethyl acetate = 15/1).

$^1H$  NMR (600 MHz,  $CDCl_3$ )  $\delta$  11.14 (s, 1H), 8.05 (dd,  $J$  = 12.2, 2.4 Hz, 1H), 7.88 (d,  $J$  = 9.0 Hz, 1H), 7.85 – 7.80 (m, 2H), 7.69 (dd,  $J$  = 8.9, 6.0 Hz, 1H), 7.28 (d,  $J$  = 8.1 Hz, 2H), 7.13 (d,  $J$  = 9.1 Hz, 1H), 7.09 (m, 1H), 2.37 (s, 3H).  $^{13}C$  NMR (151 MHz,  $CDCl_3$ )  $\delta$  162.5 (d,  $J_{C-F}$  = 248.4 Hz), 159.7, 145.1, 138.9, 137.2, 131.5 (d,  $J_{C-F}$  = 10.0 Hz), 131.1 (d,  $J_{C-F}$  = 10.6 Hz), 130.1, 126.8, 125.8, 119.6 (d,  $J_{C-F}$  =

2.7 Hz), 114.3 (d,  $J_{C-F} = 24.9$  Hz), 112.3, 108.3 (d,  $J_{C-F} = 25.8$  Hz), 21.8.  $^{19}\text{F}$  NMR (376 MHz,  $\text{CDCl}_3$ )  $\delta$  -108.2. HRMS: m/z:  $[\text{M} + \text{Na}]^+$  calculated for  $\text{C}_{17}\text{H}_{13}\text{FNaO}_3\text{S}^+$ : 339.0462, found 339.0461.

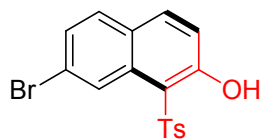

#### 7-Bromo-1-tosyl-naphthalen-2-ol (**3fa**)

**3fa** was obtained according to the general procedure in 60% yield (45.1 mg), yellow solid, mp = 166.7-168.6 °C,  $R_f = 0.25$  (hexanes/ethyl acetate = 15/1).

$^1\text{H}$  NMR (600 MHz,  $\text{CDCl}_3$ )  $\delta$  11.16 (s, 1H), 8.56 (d,  $J = 1.8$  Hz, 1H), 7.86 – 7.83 (m, 3H), 7.54 (d,  $J = 8.5$  Hz, 1H), 7.40 (dd,  $J = 8.6, 1.8$  Hz, 1H), 7.29 (d,  $J = 8.1$  Hz, 2H), 7.16 (d,  $J = 9.0$  Hz, 1H), 2.37 (s, 3H).  $^{13}\text{C}$  NMR (151 MHz,  $\text{CDCl}_3$ )  $\delta$  159.3, 145.2, 138.8, 137.2, 130.8, 130.5, 130.1, 128.0, 127.3, 126.9, 125.7, 123.8, 120.8, 112.0, 21.8. HRMS: m/z:  $[\text{M} + \text{Na}]^+$  calculated for  $\text{C}_{17}\text{H}_{13}\text{BrNaO}_3\text{S}^+$ : 398.9661, found 398.9656.

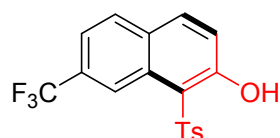

#### 1-Tosyl-7-(trifluoromethyl)naphthalen-2-ol (**3ga**)

**3ga** was obtained according to the general procedure in 61% yield (45.0 mg), yellow solid, mp = 148.6-150.2 °C,  $R_f = 0.25$  (hexanes/ethyl acetate = 15/1).

$^1\text{H}$  NMR (600 MHz,  $\text{CDCl}_3$ )  $\delta$  11.22 (s, 1H), 8.76 – 8.70 (m, 1H), 7.96 (d,  $J = 9.1$  Hz, 1H), 7.89 – 7.84 (m, 2H), 7.82 (d,  $J = 8.4$  Hz, 1H), 7.51 (dd,  $J = 8.3, 1.7$  Hz, 1H), 7.33 – 7.27 (m, 3H), 2.38 (s, 3H).  $^{13}\text{C}$  NMR (151 MHz,  $\text{CDCl}_3$ )  $\delta$  159.4, 145.4, 138.8, 136.9, 130.2, 130.1, 130.0, 128.9, 127.0, 124.2 (q,  $J_{C-F} = 272.9$  Hz), 122.8, 120.9 (q,  $J_{C-F} = 4.6$  Hz), 120.4 (q,  $J_{C-F} = 3.3$  Hz), 113.8, 100.2, 21.8.  $^{19}\text{F}$  NMR (376 MHz,  $\text{CDCl}_3$ )  $\delta$  -62.6. HRMS: m/z:  $[\text{M} + \text{Na}]^+$  calculated for  $\text{C}_{18}\text{H}_{13}\text{F}_3\text{NaO}_3\text{S}^+$ : 389.0430, found 389.0422.

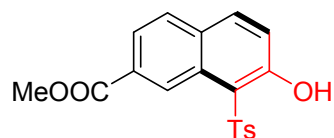

#### Methyl 7-hydroxy-8-tosyl-2-naphthoate (**3ha**)

**3ha** was obtained according to the general procedure in 69% yield (48.3 mg), white solid, mp = 169.2-170.3 °C,  $R_f = 0.20$  (hexanes/ethyl acetate = 15/1).

$^1\text{H}$  NMR (600 MHz,  $\text{CDCl}_3$ )  $\delta$  11.20 (s, 1H), 9.15 (s, 1H), 7.95 – 7.89 (m, 4H), 7.74 (d,  $J = 8.4$  Hz, 1H), 7.29 (d,  $J = 8.1$  Hz, 2H), 7.28 – 7.23 (m, 1H), 3.97 (s, 3H), 2.36 (s, 3H).  $^{13}\text{C}$  NMR (151 MHz,  $\text{CDCl}_3$ )  $\delta$  166.8, 159.0, 145.1, 139.0, 136.9, 131.1, 130.1, 129.9, 129.3, 128.9, 127.2, 125.8, 124.3, 122.8, 113.8, 52.6, 21.8. HRMS: m/z:  $[\text{M} + \text{Na}]^+$  calculated for  $\text{C}_{19}\text{H}_{16}\text{NaO}_5\text{S}^+$ : 379.0611, found 379.0601.

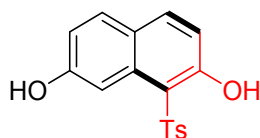

1-Tosyl-naphthalene-2,7-diol (**3ia**)

**3ia** was obtained according to the general procedure in 56% yield (35.4 mg), white solid, mp = 194.9-195.8 °C,  $R_f$  = 0.10 (hexanes/ethyl acetate = 15/1).

$^1\text{H}$  NMR (600 MHz,  $\text{CDCl}_3$ )  $\delta$  11.04 (s, 1H), 7.84 – 7.81 (m, 4H), 7.58 (d,  $J$  = 8.8 Hz, 1H), 7.18 (d,  $J$  = 8.0 Hz, 2H), 7.00 (d,  $J$  = 8.9 Hz, 1H), 6.92 (d,  $J$  = 8.8 Hz, 1H), 6.34 (s, 1H), 2.31 (s, 3H).  $^{13}\text{C}$  NMR (151 MHz,  $\text{CDCl}_3$ )  $\delta$  159.6, 156.6, 144.9, 138.9, 137.5, 131.5, 131.3, 130.1, 126.7, 124.0, 117.4, 115.8, 110.8, 106.7, 21.7. HRMS:  $m/z$ :  $[\text{M} + \text{Na}]^+$  calculated for  $\text{C}_{17}\text{H}_{14}\text{NaO}_4\text{S}^+$ : 337.0505, found 337.0498.

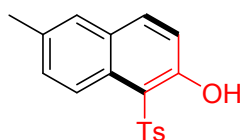

6-Methyl-1-tosyl-naphthalen-2-ol (**3ja**)

**3ja** was obtained according to the general procedure in 64% yield (40.2 mg), yellow solid, mp = 126.0-127.7 °C,  $R_f$  = 0.30 (hexanes/ethyl acetate = 15/1).

$^1\text{H}$  NMR (600 MHz,  $\text{CDCl}_3$ )  $\delta$  11.03 (s, 1H), 8.23 (d,  $J$  = 8.8 Hz, 1H), 7.88 – 7.78 (m, 3H), 7.47 (s, 1H), 7.29 (dd,  $J$  = 8.9, 1.9 Hz, 1H), 7.25 – 7.24 (m, 2H), 7.13 (d,  $J$  = 9.1 Hz, 1H), 2.39 (s, 3H), 2.35 (s, 3H).  $^{13}\text{C}$  NMR (151 MHz,  $\text{CDCl}_3$ )  $\delta$  158.2, 144.7, 139.4, 137.0, 134.1, 130.9, 130.0, 129.2, 128.4, 127.6, 126.7, 123.0, 120.2, 112.2, 21.7, 21.1. HRMS:  $m/z$ :  $[\text{M} + \text{Na}]^+$  calculated for  $\text{C}_{18}\text{H}_{16}\text{NaO}_3\text{S}^+$ : 335.0712, found 335.0705.

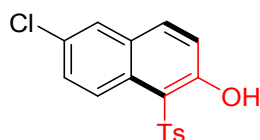

6-Chloro-1-tosyl-naphthalen-2-ol (**3ka**)

**3ka** was obtained according to the general procedure in 66% yield (44.1 mg), white solid, mp = 142.0-143.6 °C,  $R_f$  = 0.30 (hexanes/ethyl acetate = 15/1).

$^1\text{H}$  NMR (600 MHz,  $\text{CDCl}_3$ )  $\delta$  11.11 (s, 1H), 8.30 (d,  $J$  = 9.2 Hz, 1H), 7.82 – 7.80 (m, 3H), 7.67 (d,  $J$  = 2.3 Hz, 1H), 7.39 (dd,  $J$  = 9.3, 2.3 Hz, 1H), 7.27 (d,  $J$  = 8.2 Hz, 2H), 7.20 (d,  $J$  = 9.1 Hz, 1H), 2.36 (s, 3H).  $^{13}\text{C}$  NMR (151 MHz,  $\text{CDCl}_3$ )  $\delta$  158.8, 145.1, 139.0, 136.4, 130.4, 130.1, 129.8, 129.4, 127.9, 127.8, 126.7, 124.8, 121.7, 112.7, 21.8. HRMS:  $m/z$ :  $[\text{M} + \text{Na}]^+$  calculated for  $\text{C}_{17}\text{H}_{13}\text{ClNaO}_3\text{S}^+$ : 355.0166, found 355.0160.

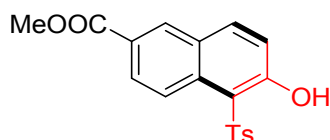

Methyl 6-hydroxy-5-tosyl-2-naphthoate (**3la**)

**3ma** was obtained according to the general procedure in 81% yield (71.2 mg), white solid, mp = 154.2-155.7 °C,  $R_f = 0.10$  (hexanes/ethyl acetate = 15/1).

$^1\text{H NMR}$  (600 MHz,  $\text{CDCl}_3$ )  $\delta$  11.31 (s, 1H), 8.42 (s, 1H), 8.39 (d,  $J = 9.2$  Hz, 1H), 8.01 (m, 2H), 7.83 (d,  $J = 8.0$  Hz, 2H), 7.25 (m, 3H), 3.93 (s, 3H), 2.36 (s, 3H).  $^{13}\text{C NMR}$  (151 MHz,  $\text{CDCl}_3$ )  $\delta$  166.6, 160.4, 145.1, 138.9, 138.4, 132.3, 131.7, 130.1, 128.4, 128.1, 126.8, 126.1, 123.3, 121.3, 112.8, 52.4, 21.7. HRMS:  $m/z$ :  $[\text{M} + \text{Na}]^+$  calculated for  $\text{C}_{19}\text{H}_{16}\text{NaO}_5\text{S}^+$ : 379.0611, found 379.0604.

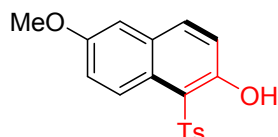

6-Methoxy-1-tosyl-2-naphthalen-2-ol (**3ma**)

**3ka** was obtained according to the general procedure in 80% (20:1) yield (52.6 mg), white solid, mp = 131.1-133.2 °C,  $R_f = 0.25$  (hexanes/ethyl acetate = 15/1).

$^1\text{H NMR}$  (600 MHz,  $\text{CDCl}_3$ )  $\delta$  10.90 (s, 1H), 8.27 (d,  $J = 9.4$  Hz, 1H), 7.82 – 7.79 (m, 3H), 7.25 (d,  $J = 8.1$  Hz, 2H), 7.14 (d,  $J = 9.0$  Hz, 1H), 7.12 (dd,  $J = 9.4, 2.8$  Hz, 1H), 7.03 (d,  $J = 2.8$  Hz, 1H), 3.82 (s, 3H), 2.34 (s, 3H).  $^{13}\text{C NMR}$  (151 MHz,  $\text{CDCl}_3$ )  $\delta$  157.0, 156.3, 144.7, 139.3, 136.3, 130.3, 130.0, 126.7, 124.6, 124.3, 120.7, 120.4, 112.5, 108.2, 55.4, 21.7. HRMS:  $m/z$ :  $[\text{M} + \text{Na}]^+$  calculated for  $\text{C}_{18}\text{H}_{16}\text{NaO}_4\text{S}^+$ : 351.0662, found 351.0655.

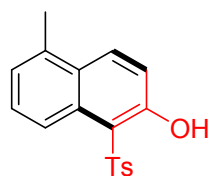

5-Methyl-1-tosyl-2-naphthalen-2-ol (**3na**)

**3na** was obtained according to the general procedure in 74% yield (46.4 mg), yellow solid, mp = 160.2-161.4 °C,  $R_f = 0.30$  (hexanes/ethyl acetate = 15/1).

$^1\text{H NMR}$  (600 MHz,  $\text{CDCl}_3$ )  $\delta$  11.16 (s, 1H), 8.21 (d,  $J = 8.8$  Hz, 1H), 8.14 (d,  $J = 9.4$  Hz, 1H), 7.82 – 7.80 (m, 2H), 7.34 – 7.31 (m, 1H), 7.25 – 7.23 (m, 2H), 7.20 (d,  $J = 9.3$  Hz, 1H), 7.16 – 7.14 (m, 1H), 2.61 (s, 3H), 2.34 (s, 3H).  $^{13}\text{C NMR}$  (151 MHz,  $\text{CDCl}_3$ )  $\delta$  158.5, 144.7, 139.4, 135.6, 133.5, 130.0, 129.9, 128.6, 127.9, 126.7, 125.7, 121.5, 119.9, 112.7, 21.7, 19.9. HRMS:  $m/z$ :  $[\text{M} + \text{Na}]^+$  calculated for  $\text{C}_{18}\text{H}_{16}\text{NaO}_3\text{S}^+$ : 335.0712, found 335.0704.

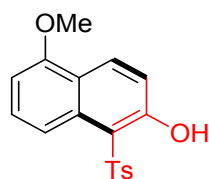

5-Methoxy-1-tosyl-2-naphthalen-2-ol (**3oa**)

**30a** was obtained according to the general procedure in 90% yield (59.0 mg), white solid, mp = 142.2-143.0 °C,  $R_f = 0.30$  (hexanes/ethyl acetate = 15/1).

$^1\text{H NMR}$  (600 MHz,  $\text{CDCl}_3$ )  $\delta$  11.14 (s, 1H), 8.42 (d,  $J = 9.3$  Hz, 1H), 7.88 (d,  $J = 8.8$  Hz, 1H), 7.81 (d,  $J = 8.0$  Hz, 2H), 7.35 (t,  $J = 8.3$  Hz, 1H), 7.25 – 7.23 (m, 2H), 7.13 (d,  $J = 9.3$  Hz, 1H), 6.67 (d,  $J = 7.8$  Hz, 1H), 3.90 (s, 3H), 2.34 (s, 3H).  $^{13}\text{C NMR}$  (151 MHz,  $\text{CDCl}_3$ )  $\delta$  159.1, 156.0, 144.5, 139.2, 131.4, 130.9, 129.8, 129.3, 126.6, 120.5, 118.9, 115.3, 111.9, 103.2, 55.6, 21.6. HRMS: m/z:  $[\text{M} + \text{Na}]^+$  calculated for  $\text{C}_{18}\text{H}_{16}\text{NaO}_4\text{S}^+$ : 351.0662, found 351.0658.

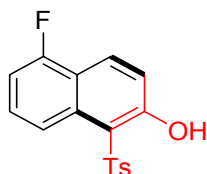

#### 5-Fluoro-1-tosyl-naphthalen-2-ol (**3pa**)

**3pa** was obtained according to the general procedure in 53% yield (33.4 mg), white solid, mp = 146.1-146.6 °C,  $R_f = 0.25$  (hexanes/ethyl acetate = 15/1).

$^1\text{H NMR}$  (600 MHz,  $\text{CDCl}_3$ )  $\delta$  11.21 (s, 1H), 8.23 (d,  $J = 9.3$  Hz, 1H), 8.12 (d,  $J = 8.8$  Hz, 1H), 7.83 – 7.81 (m, 2H), 7.40 – 7.36 (m, 1H), 7.27 (d,  $J = 8.2$  Hz, 2H), 7.23 (d,  $J = 9.3$  Hz, 1H), 7.01 – 6.98 (m, 1H), 2.37 (s, 3H).  $^{13}\text{C NMR}$  (151 MHz,  $\text{CDCl}_3$ )  $\delta$  159.5, 159.2 (d,  $J_{\text{C-F}} = 253.0$  Hz), 145.0, 139.1, 131.2 (d,  $J_{\text{C-F}} = 3.5$  Hz), 130.1, 129.7 (d,  $J_{\text{C-F}} = 7.3$  Hz), 129.2 (d,  $J_{\text{C-F}} = 9.1$  Hz), 126.8, 120.8 (d,  $J_{\text{C-F}} = 2.1$  Hz), 119.1 (d,  $J_{\text{C-F}} = 16.7$  Hz), 119.0 (d,  $J_{\text{C-F}} = 4.3$  Hz), 112.5, 108.7 (d,  $J_{\text{C-F}} = 19.7$  Hz), 21.8.  $^{19}\text{F NMR}$  (376 MHz,  $\text{CDCl}_3$ )  $\delta$  -120.8. HRMS: m/z:  $[\text{M} + \text{Na}]^+$  calculated for  $\text{C}_{17}\text{H}_{13}\text{FNaO}_3\text{S}^+$ : 339.0462, found 339.0454.

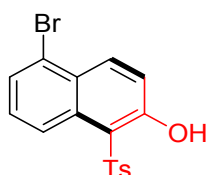

#### 5-Bromo-1-tosyl-naphthalen-2-ol (**3qa**)

**3qa** was obtained according to the general procedure in 76% yield (57.4 mg), white solid, mp = 158.0-158.8 °C,  $R_f = 0.25$  (hexanes/ethyl acetate = 15/1).

$^1\text{H NMR}$  (600 MHz,  $\text{CDCl}_3$ )  $\delta$  11.23 (s, 1H), 8.42 (d,  $J = 9.4$  Hz, 1H), 8.35 (d,  $J = 8.8$  Hz, 1H), 7.80 (d,  $J = 8.0$  Hz, 2H), 7.60 (d,  $J = 7.5$  Hz, 1H), 7.28 – 7.25 (m, 4H), 2.36 (s, 3H).  $^{13}\text{C NMR}$  (151 MHz,  $\text{CDCl}_3$ )  $\delta$  159.2, 145.0, 139.1, 136.4, 131.2, 130.1, 129.1, 128.8, 127.2, 126.7, 124.0, 122.9, 121.8, 112.6, 21.8. HRMS: m/z:  $[\text{M} + \text{Na}]^+$  calculated for  $\text{C}_{17}\text{H}_{13}\text{BrNaO}_3\text{S}^+$ : 398.9661, found 398.9648.

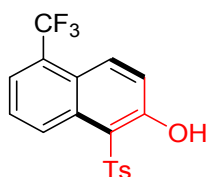

#### 1-Tosyl-5-(trifluoromethyl)naphthalen-2-ol (**3ra**)

**3ra** was obtained according to the general procedure in 63% yield (46.4 mg), white solid, mp = 98.0-99.2 °C,  $R_f$  = 0.30 (hexanes/ethyl acetate = 15/1).

$^1\text{H NMR}$  (600 MHz,  $\text{CDCl}_3$ )  $\delta$  11.25 (s, 1H), 8.61 (d,  $J$  = 8.9 Hz, 1H), 8.30 (d,  $J$  = 9.5 Hz, 1H), 7.83 (d,  $J$  = 8.0 Hz, 2H), 7.71 (d,  $J$  = 7.4 Hz, 1H), 7.49 (t,  $J$  = 8.1 Hz, 1H), 7.33 (d,  $J$  = 9.5 Hz, 1H), 7.29 (d,  $J$  = 8.0 Hz, 2H), 2.37 (s, 3H).  $^{13}\text{C NMR}$  (151 MHz,  $\text{CDCl}_3$ )  $\delta$  158.9, 145.2, 139.0, 133.0 (q,  $J_{\text{C-F}}$  = 3.0 Hz), 130.8, 130.2, 127.5, 127.3, 127.2 (q,  $J_{\text{C-F}}$  = 42.2 Hz), 126.8, 124.7, 124.4 (q,  $J_{\text{C-F}}$  = 274.1 Hz), 123.01 (q,  $J_{\text{C-F}}$  = 6.1 Hz), 122.3, 113.4, 21.8.  $^{19}\text{F NMR}$  (376 MHz,  $\text{CDCl}_3$ )  $\delta$  -58.8. HRMS:  $m/z$ :  $[\text{M} + \text{Na}]^+$  calculated for  $\text{C}_{18}\text{H}_{13}\text{F}_3\text{NaO}_3\text{S}^+$ : 389.0430, found 389.0424.

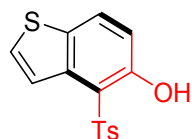

#### 4-Tosylbenzo[*b*]thiophen-5-ol (**3sa**)

**3sa** was obtained according to the general procedure in 22% yield (13.2 mg), yellow solid, mp = 179.3-179.9 °C,  $R_f$  = 0.25 (hexanes/ethyl acetate = 15/1).

$^1\text{H NMR}$  (600 MHz,  $\text{CDCl}_3$ )  $\delta$  10.21 (s, 1H), 7.89 (d,  $J$  = 8.8 Hz, 1H), 7.85 (d,  $J$  = 8.1 Hz, 2H), 7.76 (d,  $J$  = 5.6 Hz, 1H), 7.57 (d,  $J$  = 5.6 Hz, 1H), 7.28 (d,  $J$  = 8.0 Hz, 2H), 7.05 (d,  $J$  = 8.8 Hz, 1H), 2.38 (s, 3H).  $^{13}\text{C NMR}$  (151 MHz,  $\text{CDCl}_3$ )  $\delta$  156.0, 145.0, 139.0, 136.3, 133.3, 130.8, 130.1, 129.9, 126.7, 122.8, 117.1, 115.1, 21.8. HRMS:  $m/z$ :  $[\text{M} + \text{Na}]^+$  calculated for  $\text{C}_{15}\text{H}_{12}\text{NaO}_3\text{S}_2^+$ : 327.0120, found 327.0116.

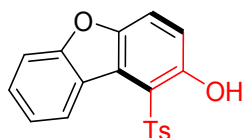

#### 1-Tosyldibenzo[*b,d*]furan-2-ol (**3ta**)

**3ta** was obtained according to the general procedure in 23% yield (15.7 mg), white solid, mp = 163.5-164.0 °C,  $R_f$  = 0.25 (hexanes/ethyl acetate = 15/1).

$^1\text{H NMR}$  (600 MHz,  $\text{CDCl}_3$ )  $\delta$  10.32 (s, 1H), 8.59 (d,  $J$  = 8.1 Hz, 1H), 7.85 – 7.83 (m, 2H), 7.73 (d,  $J$  = 9.0 Hz, 1H), 7.52 (d,  $J$  = 8.3 Hz, 1H), 7.47 – 7.44 (m, 1H), 7.32 – 7.28 (m, 1H), 7.24 (d,  $J$  = 8.2 Hz, 2H), 7.19 (d,  $J$  = 9.0 Hz, 1H), 2.34 (s, 3H).  $^{13}\text{C NMR}$  (151 MHz,  $\text{CDCl}_3$ )  $\delta$  157.4, 154.8, 150.3, 145.1, 138.8, 130.1, 128.5, 126.2, 125.8, 123.2, 121.8, 121.4, 120.1, 119.1, 114.2, 111.8, 21.8. HRMS:  $m/z$ :  $[\text{M} + \text{Na}]^+$  calculated for  $\text{C}_{19}\text{H}_{14}\text{NaO}_4\text{S}^+$ : 361.0505, found 361.0509.

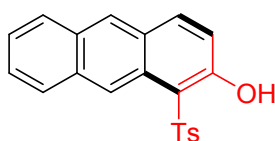

#### 1-Tosylanthracen-2-ol (**3ua**)



**3ua** was obtained according to the general procedure in 61% yield (42.8 mg), yellow solid, mp = 136.2-137.0 °C,  $R_f = 0.25$  (hexanes/ethyl acetate = 15/1).

$^1\text{H NMR}$  (600 MHz,  $\text{CDCl}_3$ )  $\delta$  11.38 (s, 1H), 8.83 (s, 1H), 8.24 (s, 1H), 8.04 (d,  $J = 9.2$  Hz, 1H), 7.92 – 7.90 (m, 2H), 7.88 (t,  $J = 8.6$  Hz, 2H), 7.48 – 7.45 (m, 1H), 7.43 – 7.40 (m, 1H), 7.23 (d,  $J = 8.2$  Hz, 2H), 7.14 (d,  $J = 9.2$  Hz, 1H), 2.30 (s, 3H).  $^{13}\text{C NMR}$  (151 MHz,  $\text{CDCl}_3$ )  $\delta$  159.6, 144.8, 139.2, 138.2, 133.1, 130.1, 129.9, 128.6, 128.3, 127.9, 127.7, 126.9, 126.8, 126.4, 125.8, 122.0, 120.9, 109.9, 21.7. HRMS:  $m/z$ :  $[\text{M} + \text{Na}]^+$  calculated for  $\text{C}_{21}\text{H}_{16}\text{NaO}_3\text{S}^+$ : 371.0712, found 371.0708.

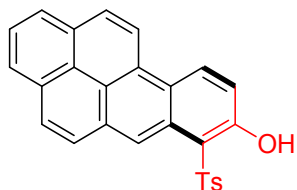

7-Tosylbenzo[ppr]tetraphen-8-ol (**3va**)

**3va** was obtained according to the general procedure in 62% yield (52.4 mg), yellow solid, mp = 222.1-222.9 °C,  $R_f = 0.30$  (hexanes/ethyl acetate = 5/1).

$^1\text{H NMR}$  (600 MHz,  $\text{DMSO}-d_6$ )  $\delta$  11.42 (s, 1H), 9.67 (s, 1H), 9.41 (d,  $J = 9.3$  Hz, 1H), 9.09 (d,  $J = 9.1$  Hz, 1H), 8.42 (d,  $J = 9.2$  Hz, 1H), 8.35 (d,  $J = 7.6$  Hz, 1H), 8.24 (d,  $J = 7.3$  Hz, 1H), 8.15 – 8.09 (m, 2H), 8.06 (t,  $J = 7.9$  Hz, 1H), 8.00 (d,  $J = 8.0$  Hz, 2H), 7.50 (d,  $J = 9.3$  Hz, 1H), 7.38 (d,  $J = 8.1$  Hz, 2H), 2.31 (s, 3H).  $^{13}\text{C NMR}$  (151 MHz,  $\text{DMSO}-d_6$ )  $\delta$  157.9, 144.0, 140.2, 132.2, 130.9, 130.6, 130.3, 129.6, 129.1, 128.6, 128.4, 127.7, 126.9, 126.6, 126.2, 125.8, 123.7, 122.3, 120.9, 119.3, 119.3, 115.2, 21.1. HRMS:  $m/z$ :  $[\text{M} + \text{H}]^+$  calculated for  $\text{C}_{27}\text{H}_{19}\text{O}_3\text{S}^+$ : 423.1049, found 423.1049.

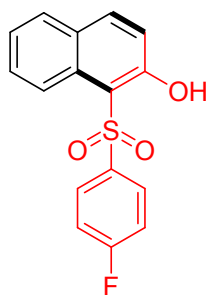

1-((4-Fluorophenyl)sulfonyl)naphthalen-2-ol (**3ab**)

**3ab** was obtained according to the general procedure in 76% yield (46.0 mg), white solid, mp = 118.4-119.2 °C,  $R_f = 0.30$  (hexanes/ethyl acetate = 15/1).

$^1\text{H NMR}$  (600 MHz,  $\text{CDCl}_3$ )  $\delta$  11.05 (s, 1H), 8.31 (d,  $J = 8.7$  Hz, 1H), 7.98 – 7.95 (m, 2H), 7.94 (d,  $J = 9.1$  Hz, 1H), 7.73 (d,  $J = 8.1$  Hz, 1H), 7.47 (t,  $J = 7.7$  Hz, 1H), 7.35 (t,  $J = 7.6$  Hz, 1H), 7.18 (d,  $J = 9.1$  Hz, 1H), 7.15 (t,  $J = 8.5$  Hz, 2H).  $^{13}\text{C NMR}$  (151 MHz,  $\text{CDCl}_3$ )  $\delta$  165.7 (d,  $J_{\text{C-F}} = 256.6$  Hz), 159.0, 138.3 (d,  $J_{\text{C-F}} = 3.4$  Hz), 137.9, 129.6 (d,  $J_{\text{C-F}} = 31.4$  Hz), 129.5, 129.4, 129.1, 128.9, 124.7, 122.9, 120.4, 116.8 (d,  $J_{\text{C-F}} = 22.7$  Hz), 111.8.  $^{19}\text{F NMR}$  (376 MHz,  $\text{CDCl}_3$ )  $\delta$  -103.3. HRMS:  $m/z$ :  $[\text{M} + \text{Na}]^+$  calculated for  $\text{C}_{16}\text{H}_{11}\text{FNaO}_3\text{S}^+$ : 325.0305, found 325.0302.

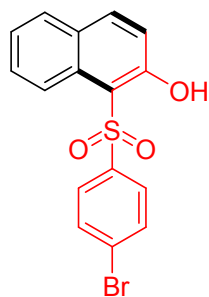

1-((4-Bromophenyl)sulfonyl)naphthalen-2-ol (**3ac**)

**3ac** was obtained according to the general procedure in 72% yield (52.5 mg), white solid, mp = 157.0-157.6 °C,  $R_f$  = 0.25 (hexanes/ethyl acetate = 15/1).

$^1\text{H}$  NMR (600 MHz,  $\text{CDCl}_3$ )  $\delta$  11.02 (s, 1H), 8.29 (d,  $J$  = 8.7 Hz, 1H), 7.94 (d,  $J$  = 9.1 Hz, 1H), 7.81 – 7.78 (m, 2H), 7.72 (d,  $J$  = 8.0 Hz, 1H), 7.61 – 7.58 (m, 2H), 7.49 – 7.46 (m, 1H), 7.36 – 7.33 (m, 1H), 7.18 (d,  $J$  = 9.1 Hz, 1H).  $^{13}\text{C}$  NMR (151 MHz,  $\text{CDCl}_3$ )  $\delta$  159.2, 141.2, 138.0, 132.7, 129.5, 129.4, 129.1, 128.91, 128.90, 128.2, 124.7, 122.9, 120.3, 111.4. HRMS: m/z:  $[\text{M} + \text{Na}]^+$  calculated for  $\text{C}_{16}\text{H}_{11}\text{BrNaO}_3\text{S}^+$ : 384.9504, found 384.9506.

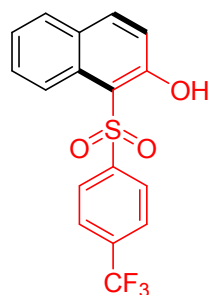

1-((4-(Trifluoromethyl)phenyl)sulfonyl)naphthalen-2-ol (**3ad**)

**3ad** was obtained according to the general procedure in 69% yield (48.5 mg), white solid, mp = 151.8-152.3 °C,  $R_f$  = 0.30 (hexanes/ethyl acetate = 15/1).

$^1\text{H}$  NMR (600 MHz,  $\text{CDCl}_3$ )  $\delta$  10.99 (s, 1H), 8.29 (d,  $J$  = 8.7 Hz, 1H), 8.07 (d,  $J$  = 8.3 Hz, 2H), 7.97 (d,  $J$  = 9.0 Hz, 1H), 7.75 – 7.72 (m, 3H), 7.50 – 7.47 (m, 1H), 7.38 – 7.35 (m, 1H), 7.20 (d,  $J$  = 9.1 Hz, 1H).  $^{13}\text{C}$  NMR (151 MHz,  $\text{CDCl}_3$ )  $\delta$  159.5, 145.7, 138.4, 135.3 (q,  $J_{\text{C-F}}$  = 33.1 Hz), 129.5, 129.4, 129.3, 128.9, 127.2, 126.6 (q,  $J_{\text{C-F}}$  = 3.8 Hz), 124.8, 123.1 (q,  $J_{\text{C-F}}$  = 273.1 Hz), 122.8, 120.4, 110.9.  $^{19}\text{F}$  NMR (376 MHz,  $\text{CDCl}_3$ )  $\delta$  -63.3. HRMS: m/z:  $[\text{M} + \text{Na}]^+$  calculated for  $\text{C}_{17}\text{H}_{11}\text{F}_3\text{NaO}_3\text{S}^+$ : 375.0273, found 375.0272.

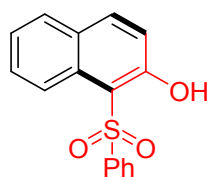

1-(Phenylsulfonyl)naphthalen-2-ol (**3ae**)

**3ae** was obtained according to the general procedure in 65% yield (36.8 mg), yellow solid, mp = 123.9-

125.2 °C,  $R_f = 0.30$  (hexanes/ethyl acetate = 15/1).

$^1\text{H NMR}$  (600 MHz,  $\text{CDCl}_3$ )  $\delta$  11.12 (s, 1H), 8.33 (d,  $J = 8.7$  Hz, 1H), 7.96 – 7.94 (m, 2H), 7.93 (d,  $J = 9.1$  Hz, 1H), 7.71 (d,  $J = 8.0$  Hz, 1H), 7.55 – 7.52 (m, 1H), 7.49 – 7.43 (m, 3H), 7.34 – 7.31 (m, 1H), 7.18 (d,  $J = 9.0$  Hz, 1H).  $^{13}\text{C NMR}$  (151 MHz,  $\text{CDCl}_3$ )  $\delta$  159.1, 142.2, 137.7, 133.7, 129.6, 129.4, 129.3, 128.9, 128.9, 126.7, 124.5, 123.1, 120.3, 111.9. HRMS:  $m/z$ :  $[\text{M} + \text{Na}]^+$  calculated for  $\text{C}_{16}\text{H}_{12}\text{NaO}_3\text{S}^+$ : 307.0399, found 307.0397.

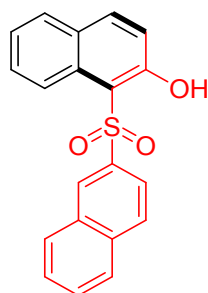

#### 1-(Naphthalen-2-ylsulfonyl)naphthalen-2-ol (**3af**)

**3af** was obtained according to the general procedure in 76% yield (50.5 mg), white solid, mp = 164.7–165.1 °C,  $R_f = 0.25$  (hexanes/ethyl acetate = 15/1).

$^1\text{H NMR}$  (600 MHz,  $\text{CDCl}_3$ )  $\delta$  11.22 (s, 1H), 8.62 (s, 1H), 8.42 (d,  $J = 8.7$  Hz, 1H), 7.97 (d,  $J = 7.6$  Hz, 1H), 7.92 (d,  $J = 9.1$  Hz, 1H), 7.85 (d,  $J = 8.8$  Hz, 1H), 7.82 – 7.78 (m, 2H), 7.68 (d,  $J = 8.0$  Hz, 1H), 7.61 – 7.56 (m, 2H), 7.44 – 7.40 (m, 1H), 7.29 (t,  $J = 7.5$  Hz, 1H), 7.21 (d,  $J = 9.0$  Hz, 1H).  $^{13}\text{C NMR}$  (151 MHz,  $\text{CDCl}_3$ )  $\delta$  159.1, 138.9, 137.8, 135.3, 132.1, 129.9, 129.7, 129.6, 129.5, 129.3, 129.0, 128.9, 128.1, 128.0, 127.9, 124.5, 123.1, 121.6, 120.4, 111.9. HRMS:  $m/z$ :  $[\text{M} + \text{Na}]^+$  calculated for  $\text{C}_{20}\text{H}_{14}\text{NaO}_3\text{S}^+$ : 357.0556, found 357.0551.

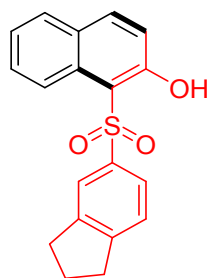

#### 1-((2,3-Dihydro-1H-inden-5-yl)sulfonyl)naphthalen-2-ol (**3ag**)

**3ag** was obtained according to the general procedure in 74% yield (48.1 mg), white solid, mp = 143.4–144.0 °C,  $R_f = 0.30$  (hexanes/ethyl acetate = 15/1).

$^1\text{H NMR}$  (600 MHz,  $\text{CDCl}_3$ )  $\delta$  11.18 (s, 1H), 8.36 (d,  $J = 8.8$  Hz, 1H), 7.89 (d,  $J = 9.1$  Hz, 1H), 7.76 – 7.74 (m, 2H), 7.69 (d,  $J = 8.0$  Hz, 1H), 7.47 – 7.44 (m, 1H), 7.33 – 7.30 (m, 1H), 7.28 (d,  $J = 7.8$  Hz, 1H), 7.17 (d,  $J = 9.0$  Hz, 1H), 2.89 – 2.87 (m, 2H), 2.87 – 2.85 (m, 2H), 2.07 – 2.01 (m, 2H).  $^{13}\text{C NMR}$  (151 MHz,  $\text{CDCl}_3$ )  $\delta$  158.7, 151.2, 145.9, 140.0, 137.4, 129.7, 129.2, 128.9, 128.8, 125.03, 125.00, 124.4, 123.2, 122.5, 120.3, 112.5, 33.0, 32.7, 25.4. HRMS:  $m/z$ :  $[\text{M} + \text{Na}]^+$  calculated for

$C_{19}H_{16}NaO_3S^+$ : 347.0712, found 347.0706.

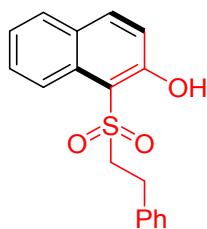

1-(Phenethylsulfonyl)naphthalen-2-ol (**3ah**)

**3ah** was obtained according to the general procedure in 72% yield (44.9 mg), white solid, mp = 91.9–92.6 °C,  $R_f$  = 0.30 (hexanes/ethyl acetate = 15/1).

$^1H$  NMR (600 MHz,  $CDCl_3$ )  $\delta$  10.85 (s, 1H), 8.51 (d,  $J$  = 8.7 Hz, 1H), 7.93 (d,  $J$  = 9.0 Hz, 1H), 7.78 (d,  $J$  = 8.0 Hz, 1H), 7.63 – 7.60 (m, 1H), 7.45 – 7.41 (m, 1H), 7.21 – 7.17 (m, 2H), 7.16 – 7.13 (m, 1H), 7.12 (d,  $J$  = 9.0 Hz, 1H), 7.04 – 7.02 (m, 2H), 3.66 – 3.62 (m, 2H), 3.09 – 3.05 (m, 2H).  $^{13}C$  NMR (151 MHz,  $CDCl_3$ )  $\delta$  159.2, 137.7, 136.9, 130.0, 129.6, 129.4, 128.9, 128.8, 128.3, 127.1, 124.7, 122.7, 120.3, 110.2, 57.5, 28.6. HRMS:  $m/z$ :  $[M + Na]^+$  calculated for  $C_{18}H_{16}NaO_3S^+$ : 335.0712, found 335.0705.

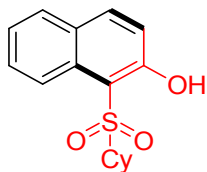

1-(Cyclohexylsulfonyl)naphthalen-2-ol (**3ai**)

**3ai** was obtained according to the general procedure in 65% yield (37.9 mg), yellow solid, mp = 91.4–92.3 °C,  $R_f$  = 0.30 (hexanes/ethyl acetate = 15/1).

$^1H$  NMR (600 MHz,  $CDCl_3$ )  $\delta$  10.85 (s, 1H), 8.55 (d,  $J$  = 8.7 Hz, 1H), 7.95 (d,  $J$  = 9.0 Hz, 1H), 7.79 (d,  $J$  = 7.9 Hz, 1H), 7.612 – 7.59 (m, 1H), 7.44 – 7.41 (m, 1H), 7.13 (d,  $J$  = 9.0 Hz, 1H), 3.27 – 3.22 (m, 1H), 2.04 – 1.86 (m, 4H), 1.67 – 1.63 (m, 3H), 1.25 – 1.18 (m, 3H).  $^{13}C$  NMR (151 MHz,  $CDCl_3$ )  $\delta$  159.8, 137.4, 130.4, 129.5, 129.1, 129.0, 124.5, 123.2, 120.1, 109.0, 63.82, 63.80, 25.2, 25.1. HRMS:  $m/z$ :  $[M + Na]^+$  calculated for  $C_{16}H_{18}NaO_3S^+$ : 313.0869, found 313.0864.

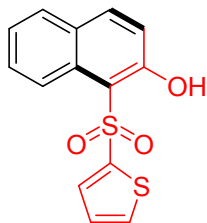

1-(Thiophen-2-ylsulfonyl)naphthalen-2-ol (**3aj**)

**3aj** was obtained according to the general procedure in 73% yield (42.6 mg), white solid, mp = 135.3–136.5 °C,  $R_f$  = 0.25 (hexanes/ethyl acetate = 15/1).

$^1H$  NMR (600 MHz,  $CDCl_3$ )  $\delta$  10.87 (s, 1H), 8.60 (d,  $J$  = 8.7 Hz, 1H), 7.92 (d,  $J$  = 9.0 Hz, 1H), 7.78 –

7.77 (m, 1H), 7.74 (d,  $J = 8.0$  Hz, 1H), 7.56 – 7.54 (m, 2H), 7.39 (t,  $J = 7.5$  Hz, 1H), 7.16 (d,  $J = 9.0$  Hz, 1H), 7.04 (t,  $J = 4.6$  Hz, 1H).  $^{13}\text{C}$  NMR (151 MHz,  $\text{CDCl}_3$ )  $\delta$  158.2, 143.6, 137.9, 133.5, 133.0, 129.5, 129.4, 129.1, 128.9, 127.7, 124.7, 123.2, 120.4, 113.4. HRMS:  $m/z$ :  $[\text{M} + \text{Na}]^+$  calculated for  $\text{C}_{14}\text{H}_{10}\text{NaO}_3\text{S}_2^+$ : 312.9964, found 312.9958.

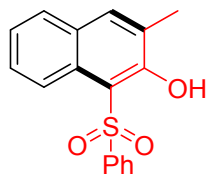

### 3-Methyl-1-(phenylsulfonyl)naphthalen-2-ol (**3ak**)

**3ak** was obtained according to the general procedure in 66% yield (39.2 mg), white solid, mp = 141.6–142.4 °C,  $R_f = 0.30$  (hexanes/ethyl acetate = 15/1)

$^1\text{H}$  NMR (600 MHz,  $\text{CDCl}_3$ )  $\delta$  11.41 (s, 1H), 8.27 (d,  $J = 8.7$  Hz, 1H), 7.94 (d,  $J = 7.8$  Hz, 2H), 7.78 (s, 1H), 7.63 (d,  $J = 8.0$  Hz, 1H), 7.53 (t,  $J = 7.4$  Hz, 1H), 7.46 (t,  $J = 7.7$  Hz, 2H), 7.38 (t,  $J = 7.9$  Hz, 1H), 7.29 (t,  $J = 7.5$  Hz, 1H), 2.43 (s, 3H).  $^{13}\text{C}$  NMR (151 MHz,  $\text{CDCl}_3$ )  $\delta$  158.5, 142.4, 136.9, 133.6, 129.4, 129.0, 128.5, 128.48, 128.44, 127.9, 126.6, 124.4, 122.9, 111.2, 17.2. HRMS:  $m/z$ :  $[\text{M} + \text{Na}]^+$  calculated for  $\text{C}_{17}\text{H}_{14}\text{NaO}_3\text{S}^+$ : 321.0556, found 321.0552.

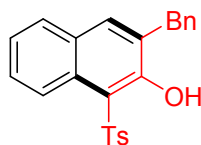

### 3-Benzyl-1-tosyl-naphthalen-2-ol (**3al**)

**3al** was obtained according to the general procedure in 45% yield (34.9 mg), white solid, mp = 166.7–167.2 °C,  $R_f = 0.30$  (hexanes/ethyl acetate = 15/1)

$^1\text{H}$  NMR (600 MHz,  $\text{CDCl}_3$ )  $\delta$  11.50 (s, 1H), 8.29 (dd,  $J = 8.7, 1.0$  Hz, 1H), 7.83 – 7.79 (m, 2H), 7.63 (s, 1H), 7.58 (dd,  $J = 8.1, 1.4$  Hz, 1H), 7.40 – 7.37 (m, 1H), 7.34 – 7.31 (m, 2H), 7.29 – 7.27 (m, 2H), 7.27 – 7.22 (m, 4H), 4.16 (s, 2H), 2.34 (s, 3H).  $^{13}\text{C}$  NMR (151 MHz,  $\text{CDCl}_3$ )  $\delta$  157.7, 144.7, 139.5, 139.4, 136.8, 132.0, 130.0, 129.3, 128.8, 128.7, 128.66, 128.4, 128.1, 126.7, 126.5, 124.4, 122.9, 112.0, 36.5, 21.7. HRMS:  $m/z$ :  $[\text{M} + \text{Na}]^+$  calculated for  $\text{C}_{24}\text{H}_{20}\text{NaO}_3\text{S}^+$ : 411.1025, found 411.1034.

### III. Derivatization Reaction

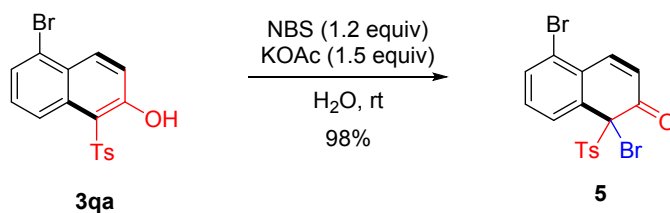

To a 15 mL tube equipped with a magnetic stirrer was charged with **3qa** (37.7 mg, 0.1 mmol), NBS (21.4 mg, 0.12 mmol), and KOAc (14.7 mg, 0.15 mmol) in 1.0 mL  $\text{H}_2\text{O}$ . Then the mixture

was stirred at room temperature for the desired time (monitored by TLC). After the reaction, the resulting mixture was extracted three times with CH<sub>2</sub>Cl<sub>2</sub>. The combined organic layer was dried over anhydrous MgSO<sub>4</sub>, after which the solvent was removed under reduced pressure. The residue was purified by column chromatography on silica gel with petroleum ether and ethyl acetate (20:1) as the eluent to afford the desired product **5** as brown solid in 98% yield (44.5 mg), mp = 82.3–84.1 °C. <sup>1</sup>H NMR (600 MHz, CDCl<sub>3</sub>) δ 8.05 (d, *J* = 7.9 Hz, 1H), 7.87 (d, *J* = 10.3 Hz, 1H), 7.72 (dd, *J* = 8.1, 1.2 Hz, 1H), 7.51 (d, *J* = 8.1 Hz, 2H), 7.38 – 7.36 (m, 1H), 7.28 (d, *J* = 8.0 Hz, 2H), 6.31 (d, *J* = 10.2 Hz, 1H), 2.46 (s, 3H). <sup>13</sup>C NMR (151 MHz, CDCl<sub>3</sub>) δ 186.6, 146.9, 143.7, 135.4, 135.0, 134.2, 132.0, 131.1, 130.4, 129.2, 126.7, 125.7, 124.9, 81.1, 22.0. HRMS: *m/z*: [M + H]<sup>+</sup> calculated for C<sub>17</sub>H<sub>13</sub>Br<sub>2</sub>O<sub>3</sub>S<sup>+</sup>: 454.8947, found 454.8947.

#### IV. Mechanistic Studies

##### (a) H/D Exchange Experiment

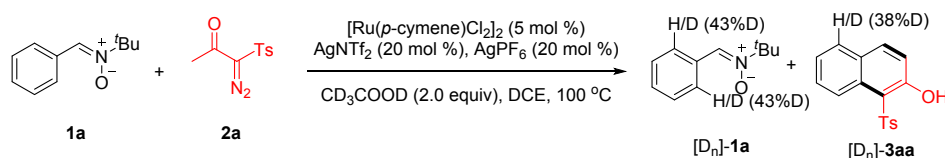

Aryl nitronium ion (**1**, 0.3 mmol),  $\alpha$ -diazo sulfonamide (**2**, 0.2 mmol), [Ru(*p*-cymene)Cl<sub>2</sub>]<sub>2</sub> (5 mol %), AgNTf<sub>2</sub> (20 mol %), AgPF<sub>6</sub> (20 mol %), and CD<sub>3</sub>COOD (2.0 equiv) were dissolved in DCE in a pressure tube under N<sub>2</sub> atmosphere. The reaction mixture was stirred at 100 °C for 24 h. After that, the solvent was removed under reduced pressure and the residue was purified by silica gel chromatography using PE/EA to afford the recovered **1a** and the product **3aa**, which was characterized by <sup>1</sup>H NMR spectroscopy. The *ortho* positions of the recovered **1a** and the product **3aa** were deuterated (43% D, and 38% D respectively).

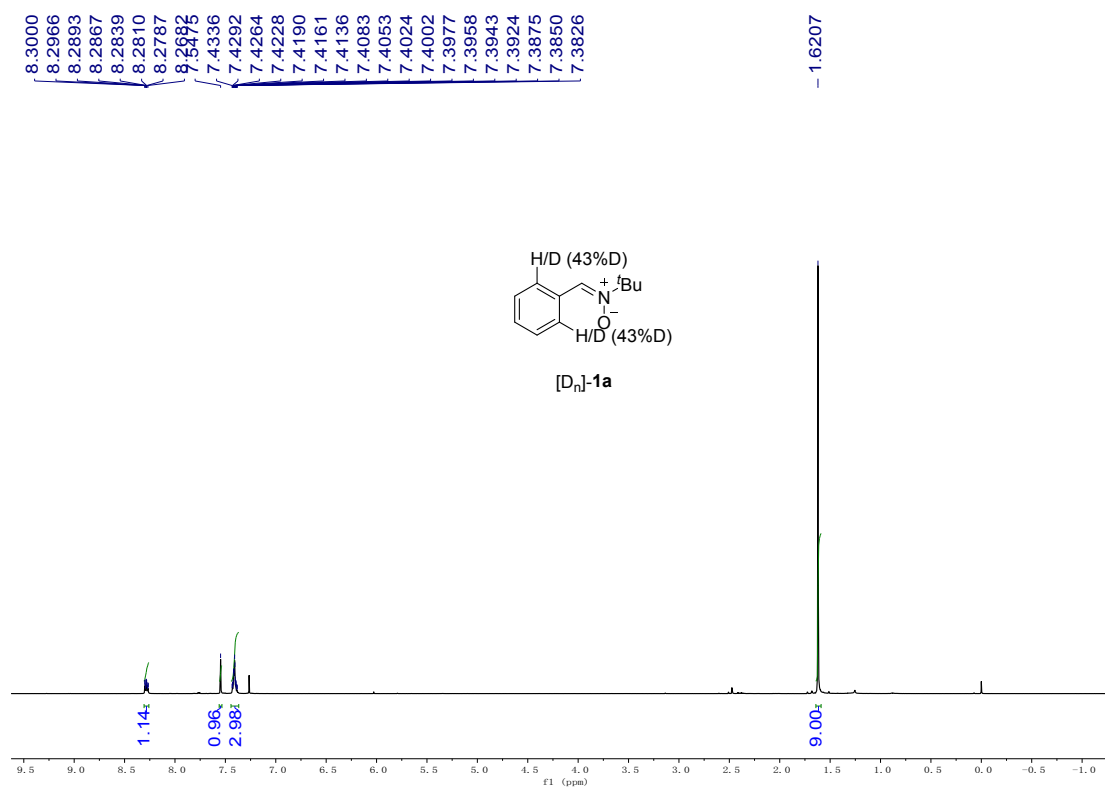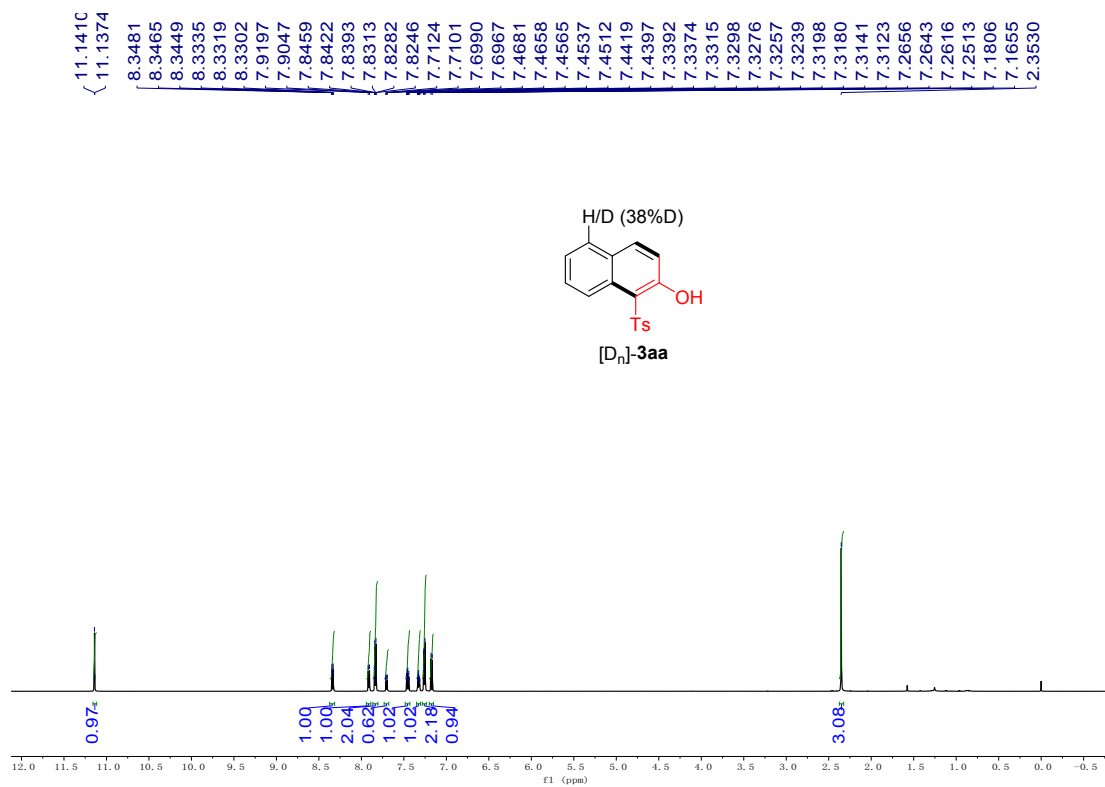

(b) The intermolecular competition experiment

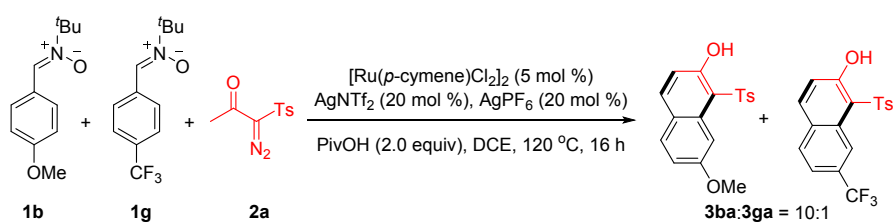

An equimolar mixture of aryl nitron **1b** (0.1 mmol) and **1g** (0.1 mmol),  $\alpha$ -diazo sulfonyl ketone (**2**, 0.2 mmol), [Ru(*p*-cymene)Cl<sub>2</sub>]<sub>2</sub> (5 mol %), AgNTf<sub>2</sub> (20 mol %), AgPF<sub>6</sub> (20 mol %), PivOH (2.0 equiv), and DCE (2 mL) were charged into a pressure tube under N<sub>2</sub>. The reaction mixture was stirred at 120 °C for 12 h. The solvent was rapidly removed under reduced pressure and the residue was purified by silica gel chromatography using PE/EA to afford the mixed product. The yield ratio (**3ba**/**3ga** = 11:1) was determined on the basis of <sup>1</sup>H NMR analysis.

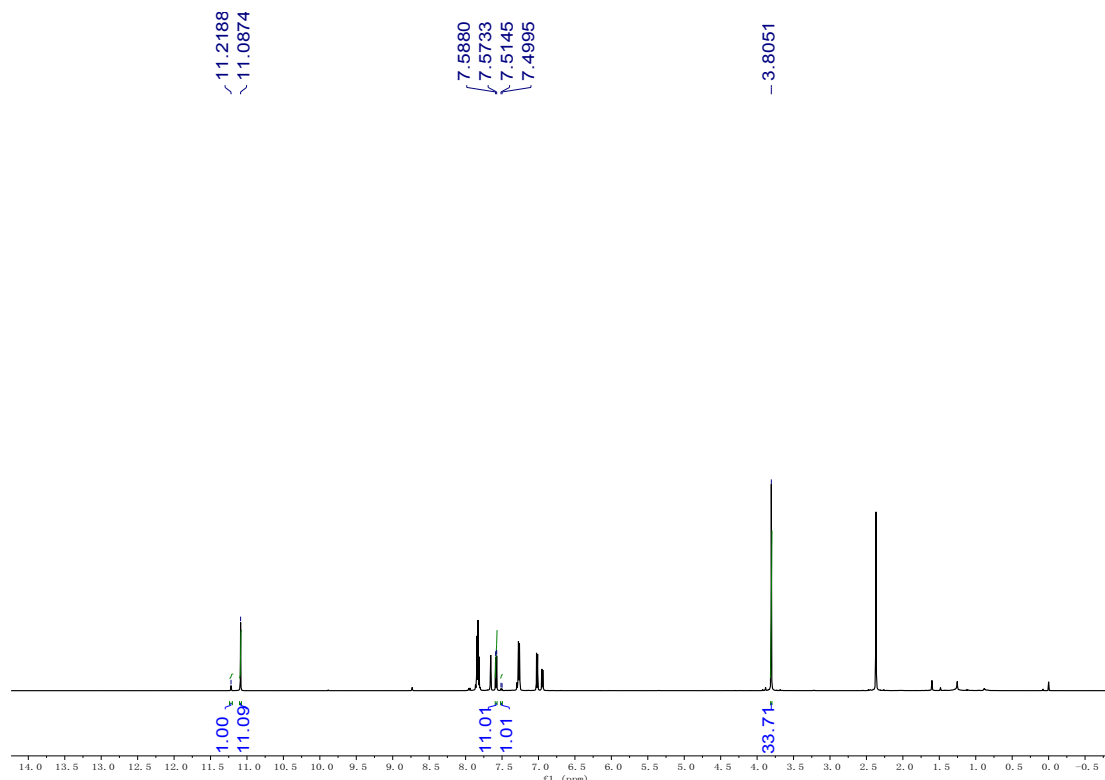

### (c) Isolation of Intermediate **6** and Control Experiments

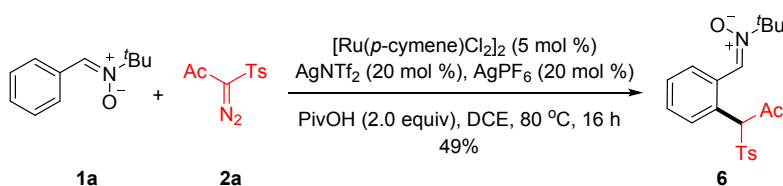

Aryl nitron **1a** (0.3 mmol), diazo sulfonylketone **2a** (0.2 mmol), [Ru(*p*-cymene)Cl<sub>2</sub>]<sub>2</sub> (5 mol %), AgNTf<sub>2</sub> (20 mol %), AgPF<sub>6</sub> (20 mol %), PivOH (2.0 equiv), and DCE (2 mL) were charged into a pressure tube. The reaction mixture was stirred under N<sub>2</sub> at 80 °C for 16 h. After the solvent was removed under reduced pressure, the residue was purified by silica gel chromatography using PE/EA (2:1) to afford the product **6** in 49% yield (38.1 mg). <sup>1</sup>H NMR (600 MHz, CDCl<sub>3</sub>)  $\delta$  7.78 (s, 1H), 7.63 – 7.61 (m, 1H), 7.43 – 7.40 (m, 3H), 7.28 – 7.25 (m, 1H), 7.21 – 7.16 (m, 3H), 5.84 (s, 1H), 2.41 (s, 3H), 2.37 (s, 3H), 1.64 (s, 9H). <sup>13</sup>C NMR (151 MHz, CDCl<sub>3</sub>)  $\delta$  199.3, 145.0, 134.3, 132.5, 130.8, 130.2, 130.1, 129.7, 129.5, 129.4, 129.1, 127.9, 78.1, 71.2, 31.7, 28.2, 21.8. HRMS: *m/z*: [M + H]<sup>+</sup> calculated for C<sub>21</sub>H<sub>26</sub>NO<sub>4</sub>S<sup>+</sup>: 388.1577, found 388.1576.



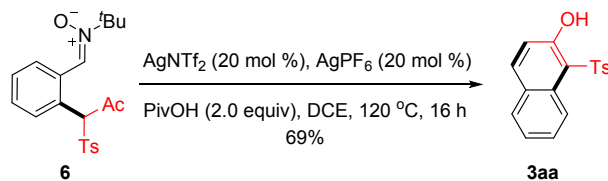

Intermediate **6** (0.14 mmol), AgNTf<sub>2</sub> (20 mol %), AgPF<sub>6</sub> (20 mol %), PivOH (2.0 equiv), and DCE (1.4 mL) were charged into a pressure tube. The reaction mixture was stirred under N<sub>2</sub> at 120 °C for 16 h. After the solvent was removed under reduced pressure, the residue was purified by silica gel chromatography using PE/EA (2:1) to afford the product **3aa** in 69% yield (28.8 mg). What's more, the intermediate **6** could be converted to the final product **3aa** without Ru(II) catalyst.

(d) **KIE Study**

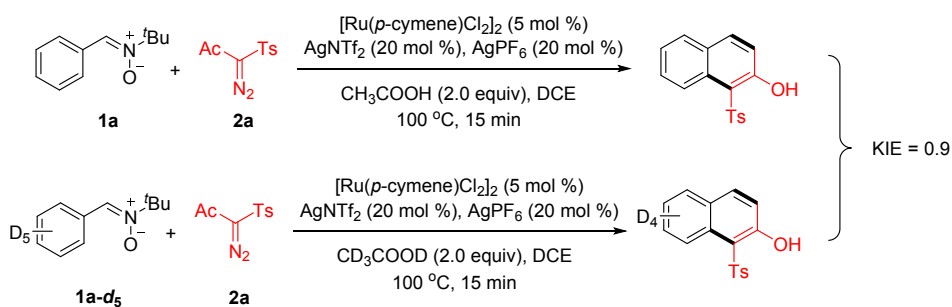

Aryl nitronium **1a** (0.15 mmol), diazo sulfonylketone **2a** (0.1 mmol), [Ru(*p*-cymene)Cl<sub>2</sub>]<sub>2</sub> (5 mol %), AgNTf<sub>2</sub> (20 mol %), AgPF<sub>6</sub> (20 mol %), and CH<sub>3</sub>COOH (2.0 equiv) were dissolved in DCE (1 mL) in a pressure tube under N<sub>2</sub> atmosphere, while the other pressure tube was changed with **1a-d<sub>5</sub>** (0.1 mmol), **2a** (0.1 mmol), [Ru(*p*-cymene)Cl<sub>2</sub>]<sub>2</sub> (5 mol %), AgNTf<sub>2</sub> (20 mol %), AgPF<sub>6</sub> (20 mol %), and CD<sub>3</sub>COOD (2.0 equiv) in DCE (1 mL) under N<sub>2</sub> atmosphere. The two reaction mixtures were stirred side by side in an oil bath preheated at 100 °C for 15 min. The two reaction tubes were chilled in an ice bath and the resulting mixtures in the two tubes were rapidly combined. The solvent was rapidly removed under reduced pressure. The resulting residue was purified by silica gel chromatography using EA/PE to afford the crude products. The KIE value was determined to be  $k_H/k_D = 0.9$  on the basis of <sup>1</sup>H NMR analysis.

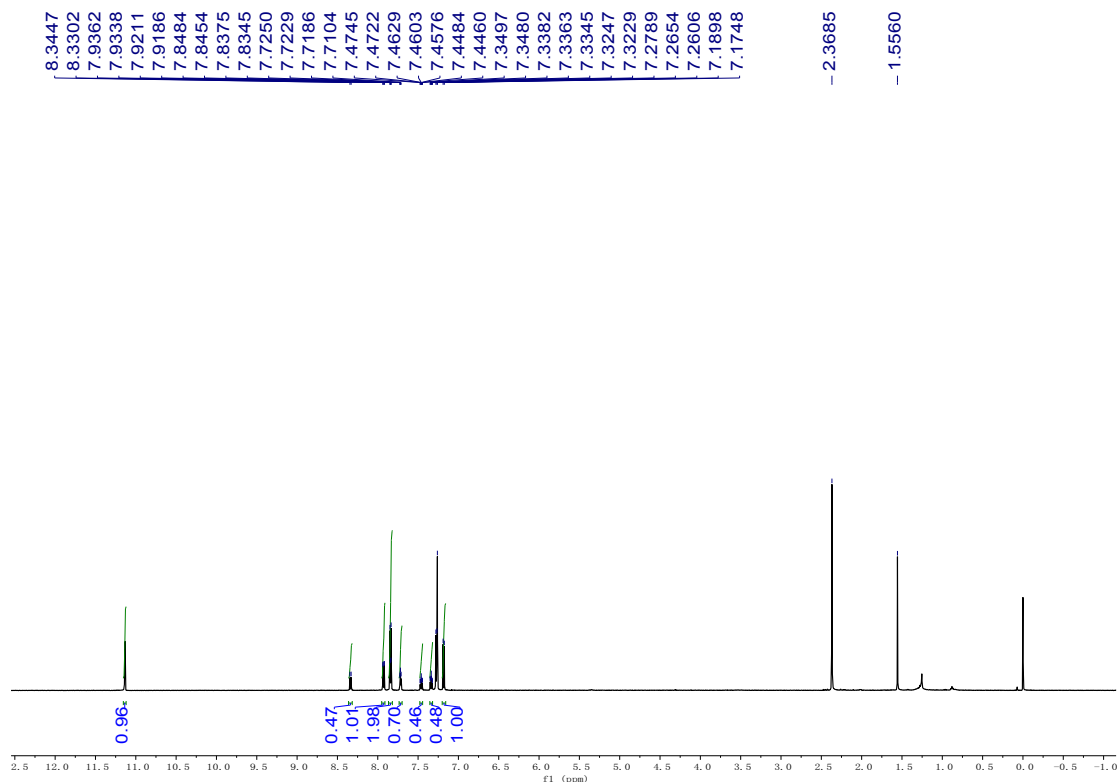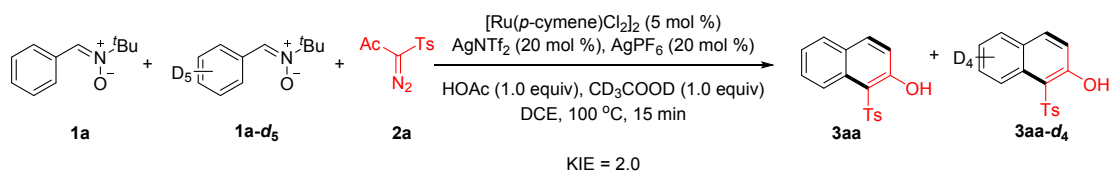

Aryl nitron **1a** (0.2 mmol), **1a-d<sub>5</sub>** (0.2 mmol), diazo sulfonylketone **2a** (0.2 mmol), [Ru(*p*-cymene)Cl<sub>2</sub>]<sub>2</sub> (5 mol %), AgNTf<sub>2</sub> (20 mol %), AgPF<sub>6</sub> (20 mol %), and CH<sub>3</sub>COOH (1.0 equiv), and CD<sub>3</sub>COOD (1.0 equiv) were dissolved in DCE (2 mL) in a pressure tube under N<sub>2</sub> atmosphere. The reaction mixture was stirred at 100 °C for 15 min. After the solvent was removed under reduced pressure, the resulting residue was purified by silica gel chromatography using EA/PE to afford the crude products. The KIE value was determined to be  $k_{\text{H}}/k_{\text{D}} = 2.0$  on the basis of <sup>1</sup>H NMR analysis.

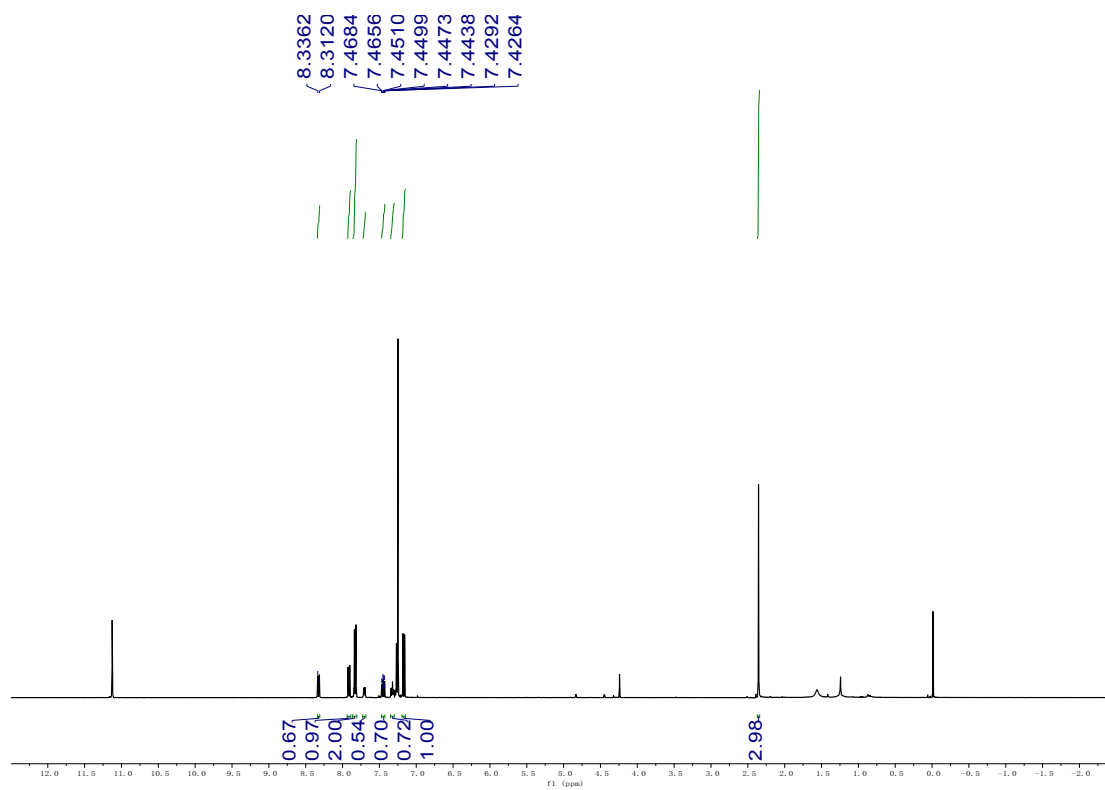

## V. Reference

1. Morales, S.; Guijarro, F. G.; Alonso, I.; GarcíaRuano, J. L.; Belen Cid, M. *ACS Catal.* **2016**, *6*, 84.
2. Shi, B.; Blake, A. J.; Lewis, W.; Campbell, I. B.; Judkins, B. D.; Moody, C. J. *J. Org. Chem.* **2010**, *75*, 152.

## VI. NMR Spectra

$^1\text{H}$  and  $^{13}\text{C}$  NMR spectra for compound **3aa**

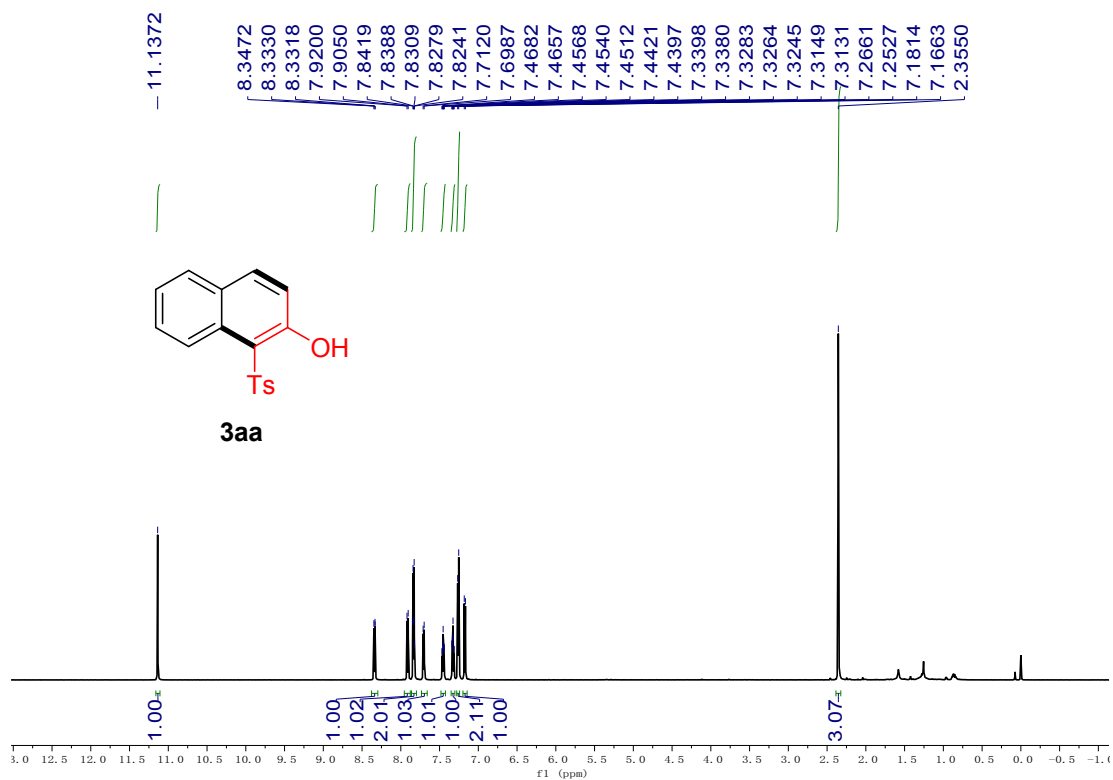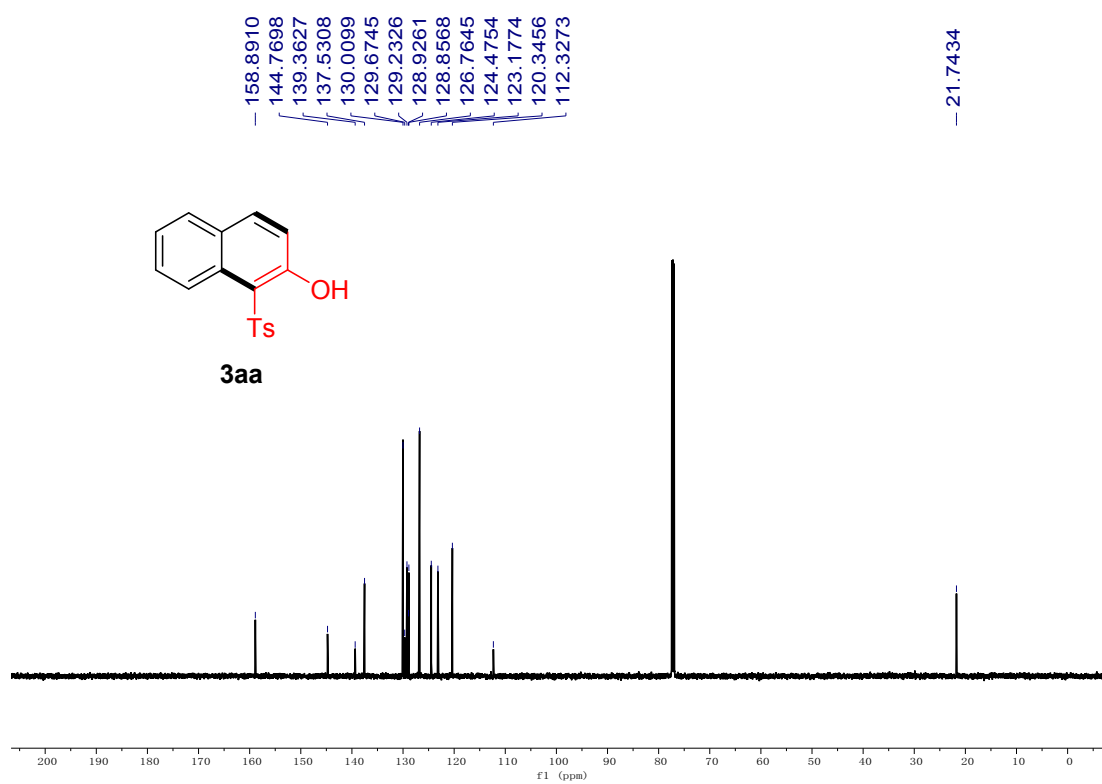

$^1\text{H}$  and  $^{13}\text{C}$  NMR spectra for compound **3ba**

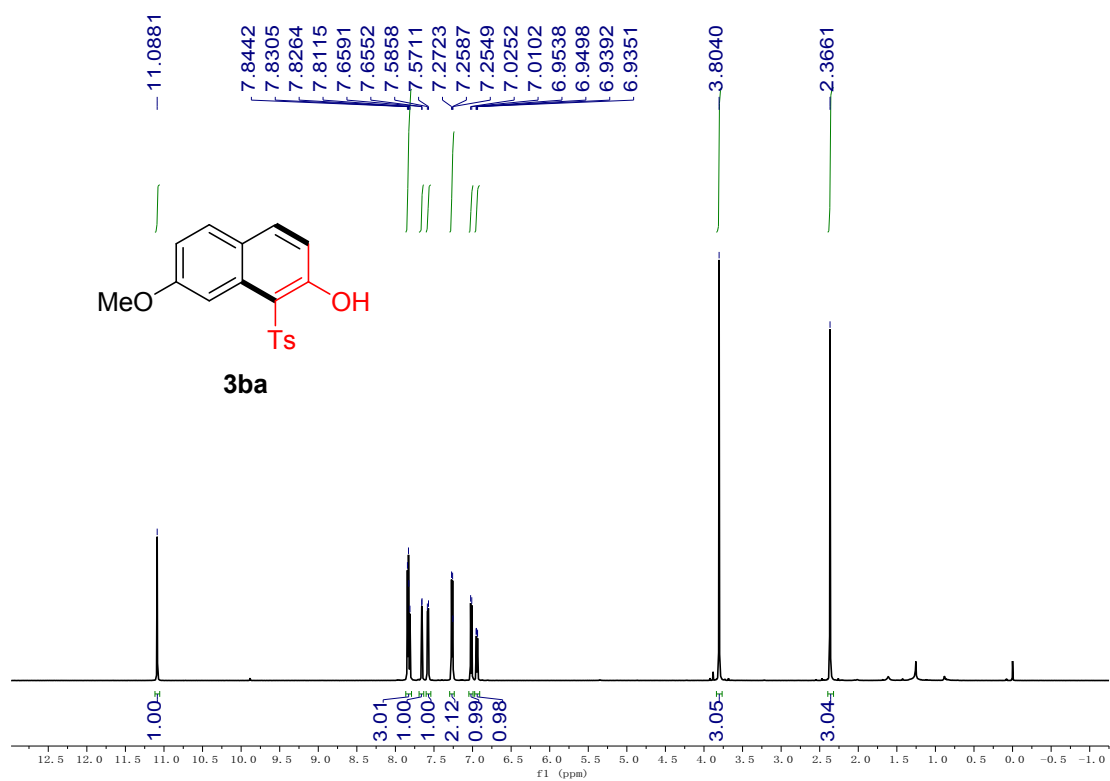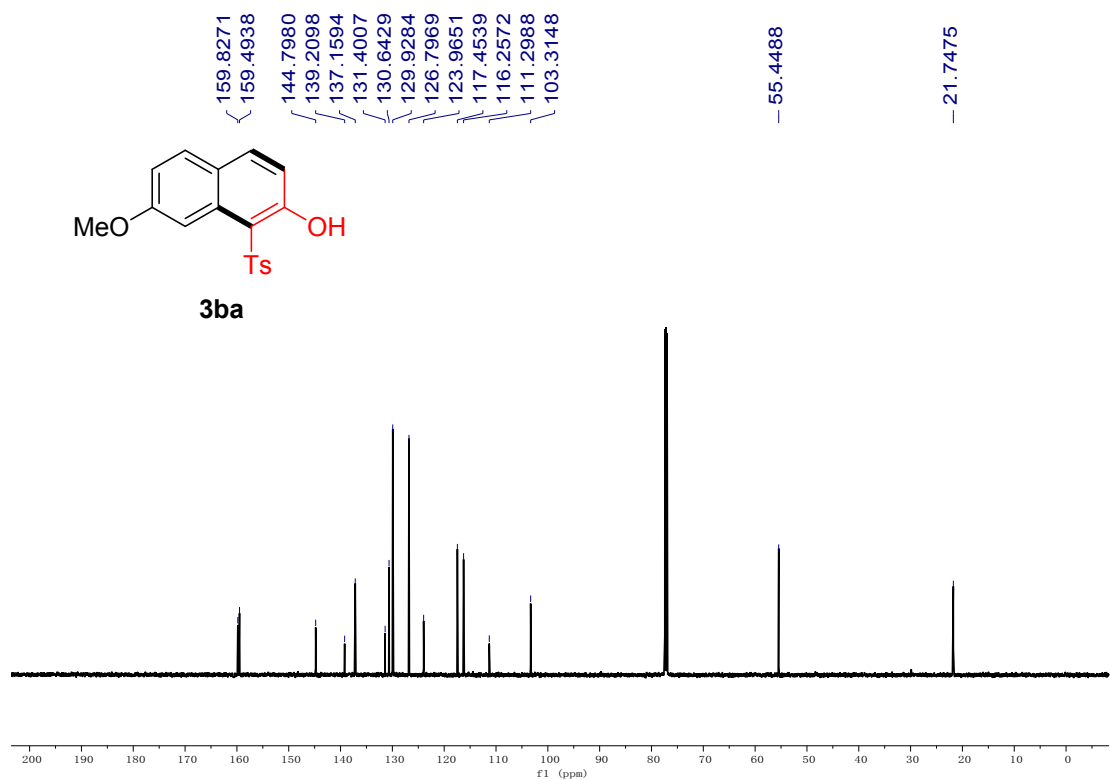

$^1\text{H}$  and  $^{13}\text{C}$  NMR spectra for compound **3ca**

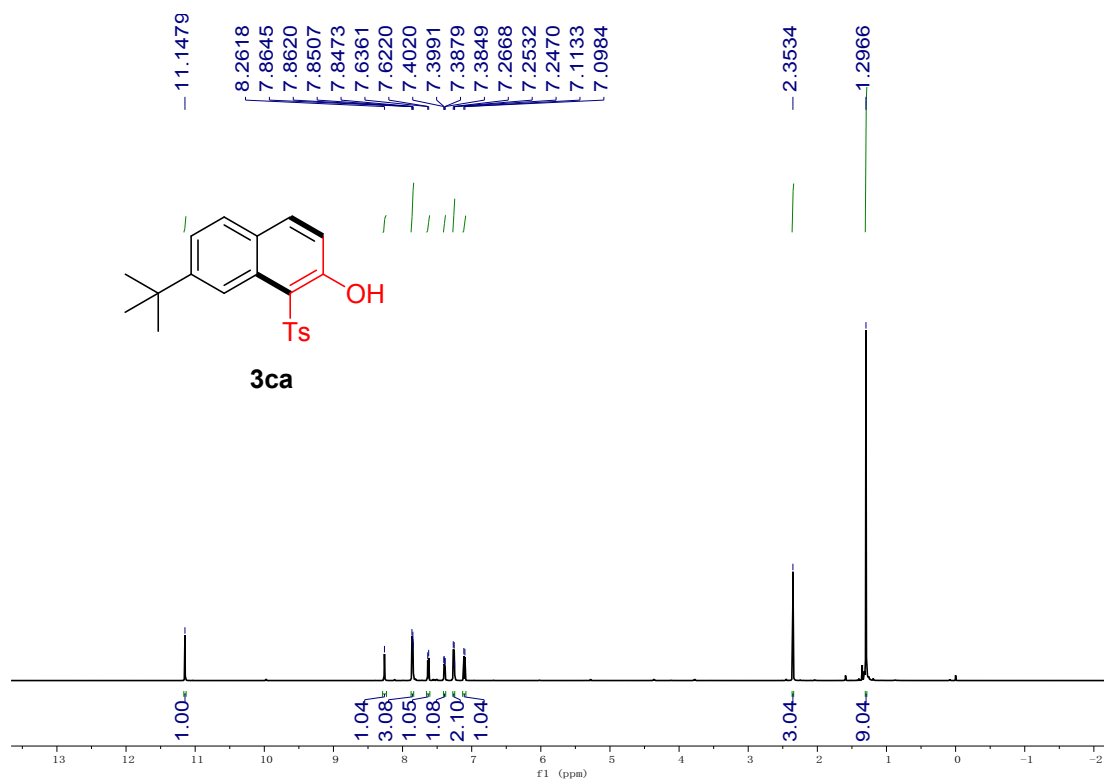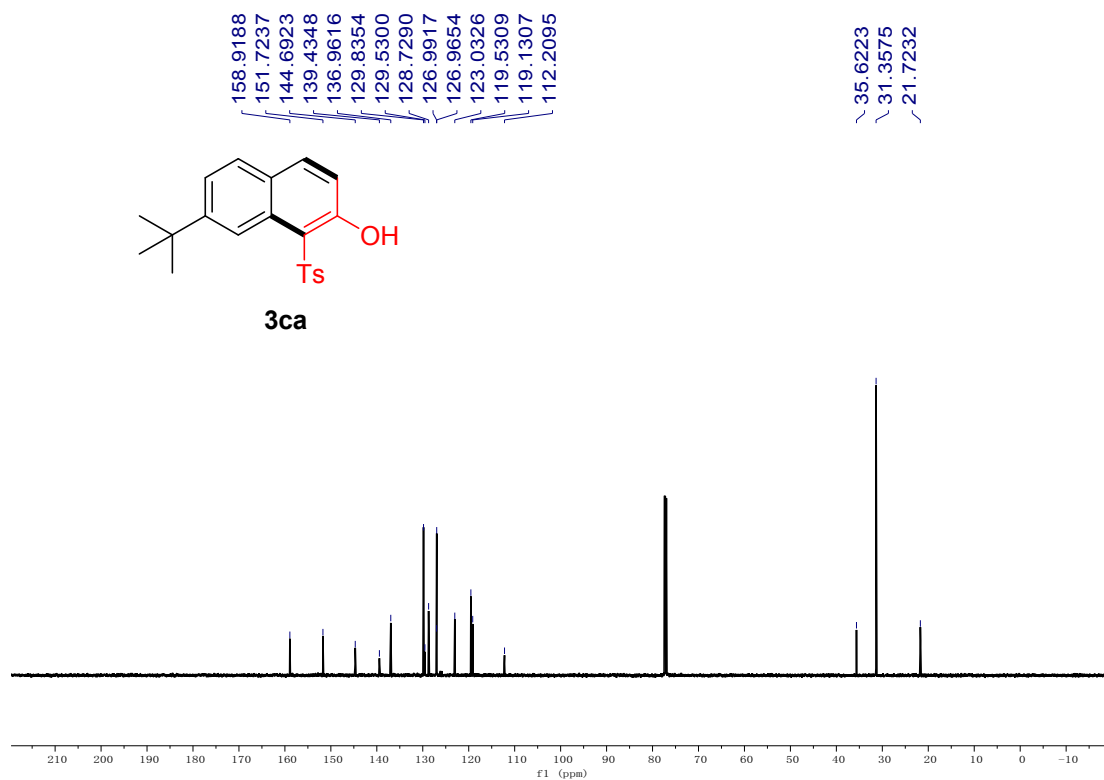

<sup>1</sup>H and <sup>13</sup>C NMR spectra for compound **3da**

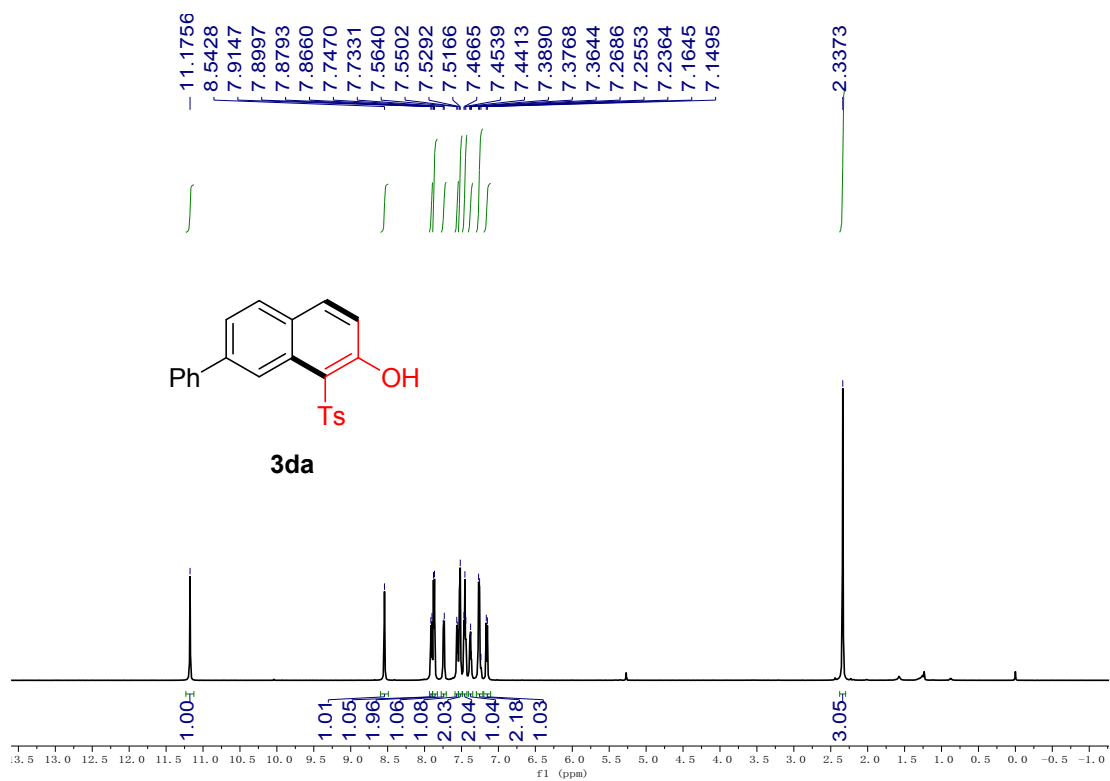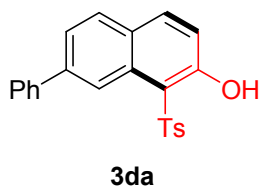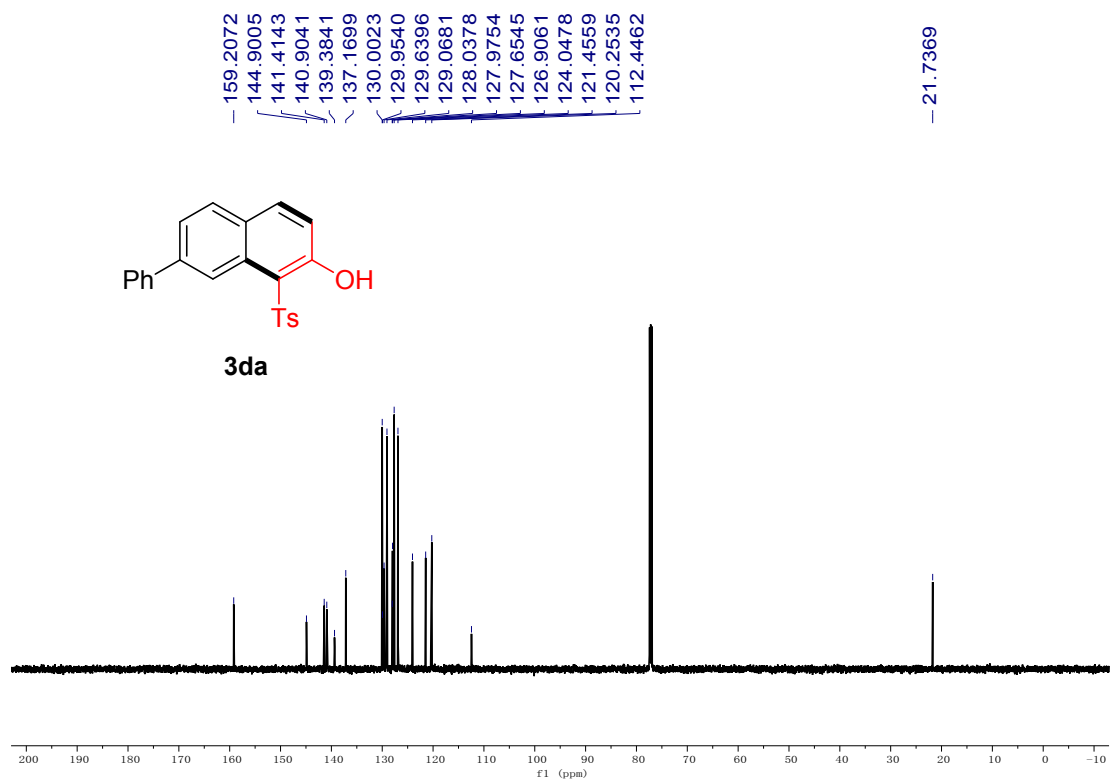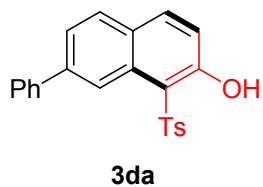

$^1\text{H}$ ,  $^{13}\text{C}$  and  $^{19}\text{F}$  NMR spectra for compound **3ea**

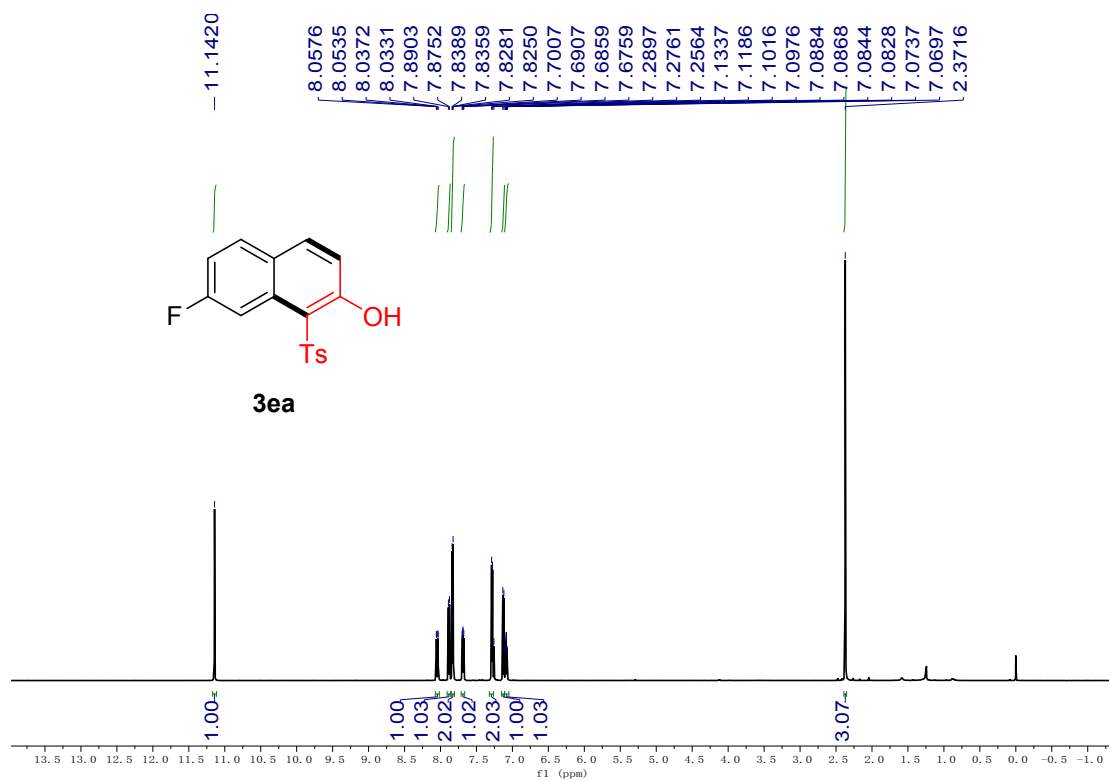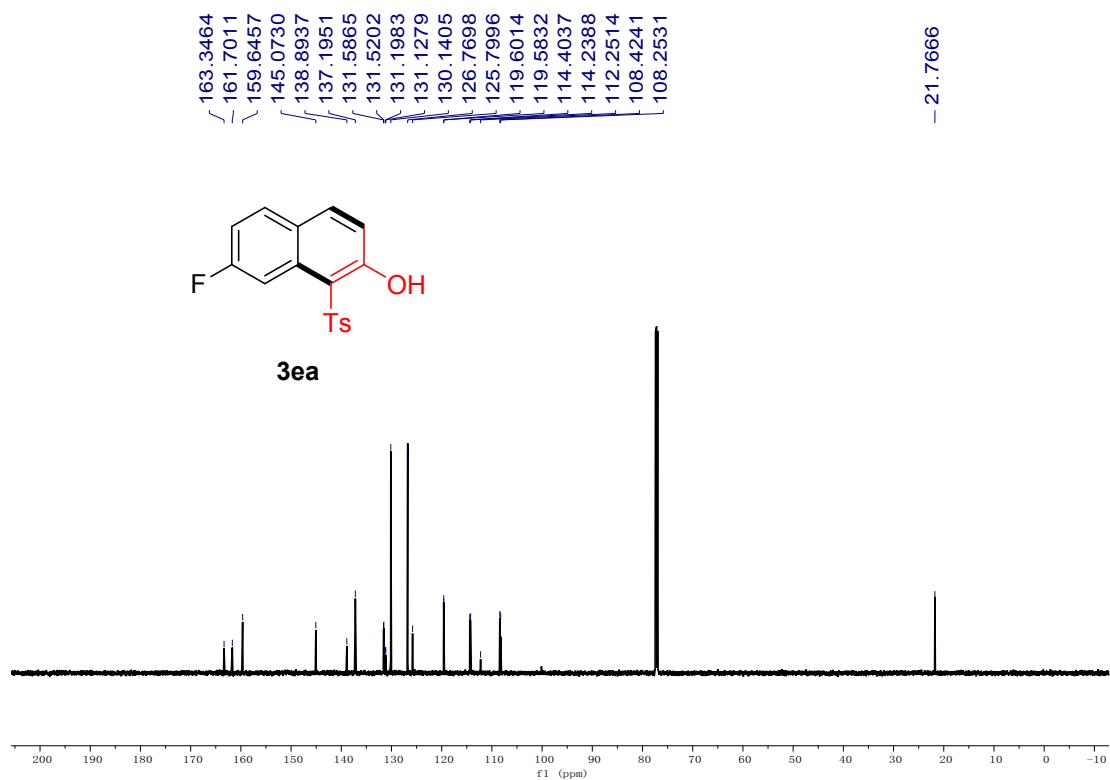



--108.2103

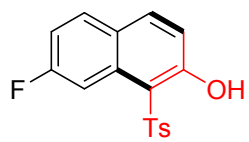

3ea

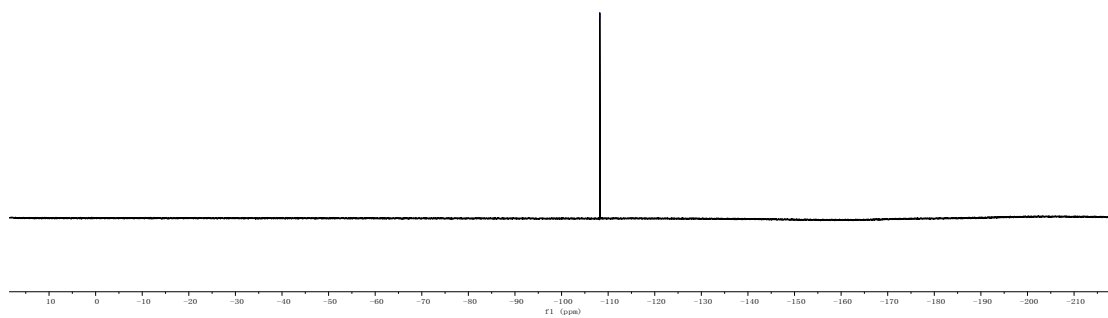

$^1\text{H}$  and  $^{13}\text{C}$  NMR spectra for compound **3fa**

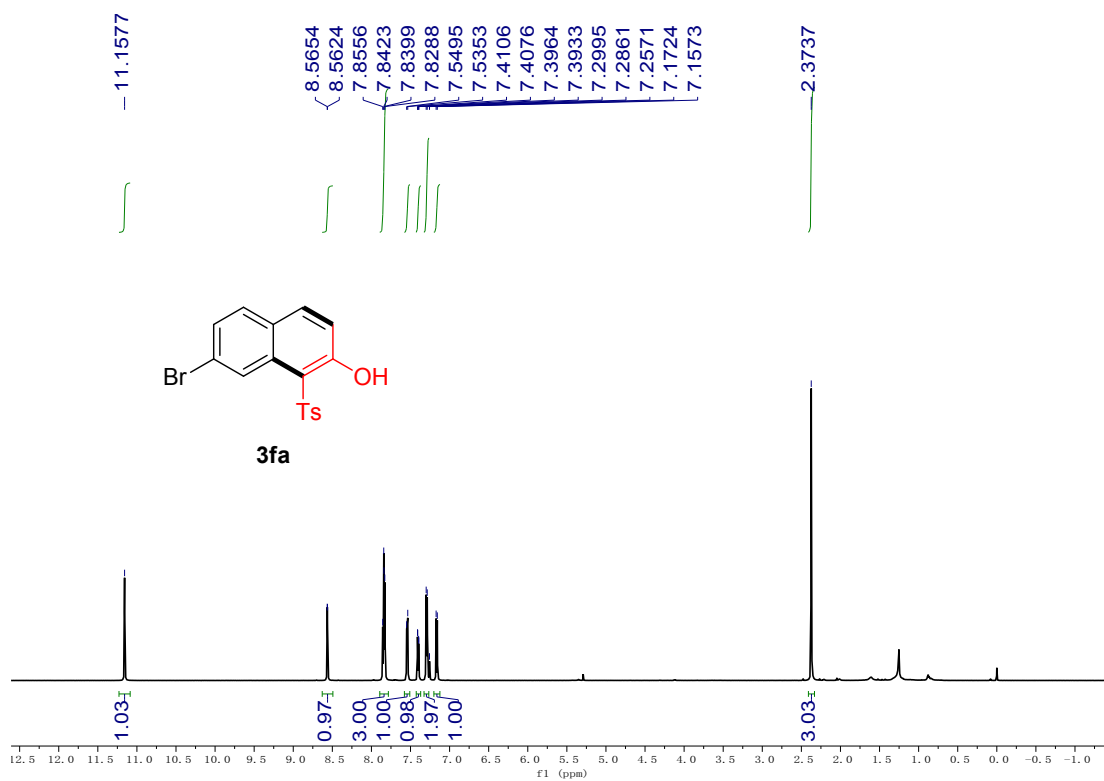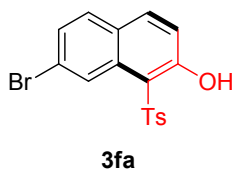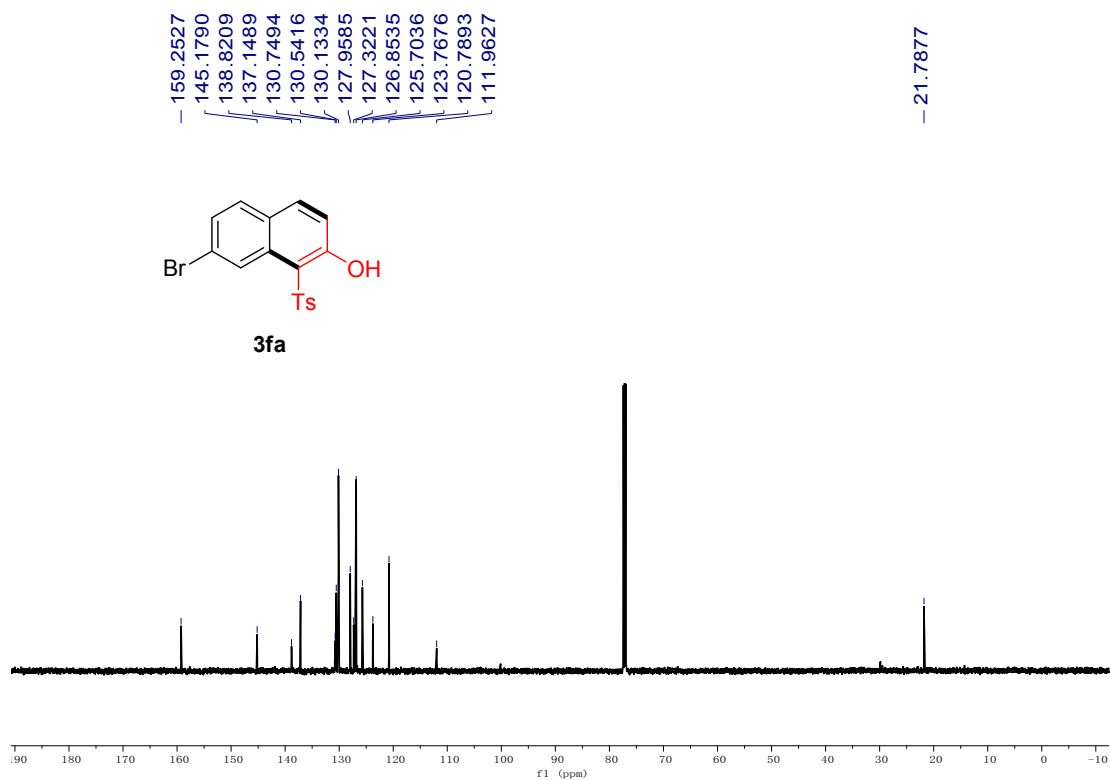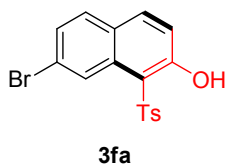

$^1\text{H}$ ,  $^{13}\text{C}$  and  $^{19}\text{F}$  NMR spectra for compound **3ga**

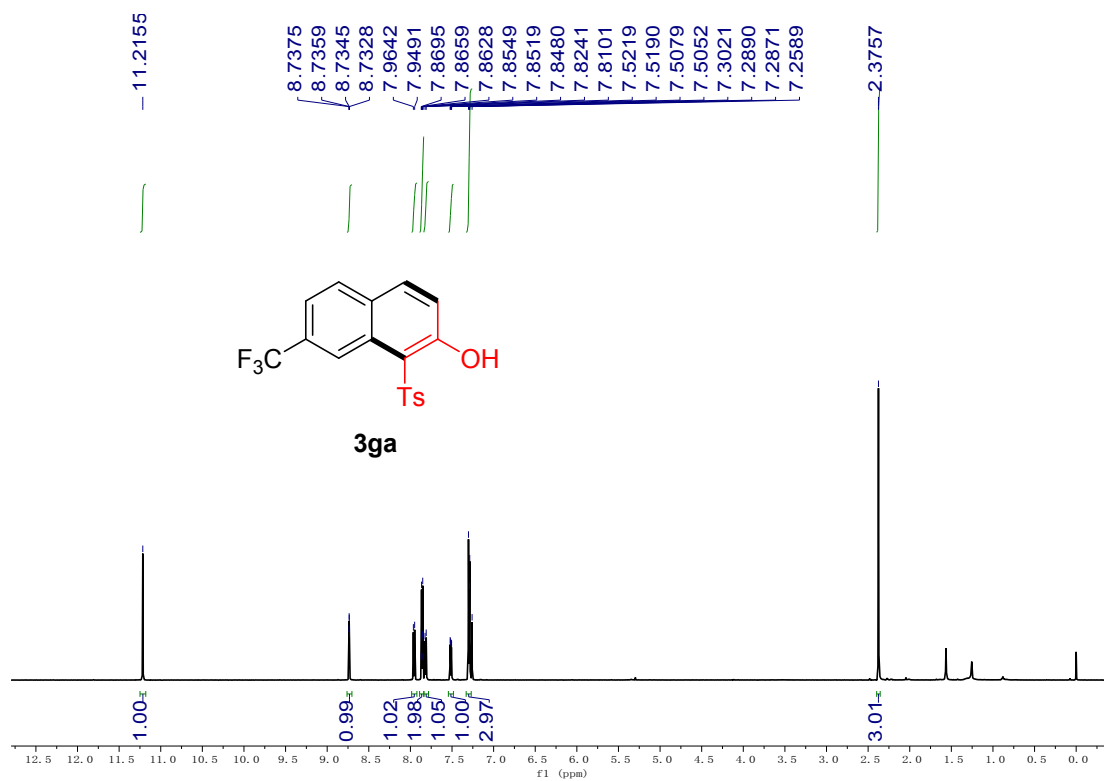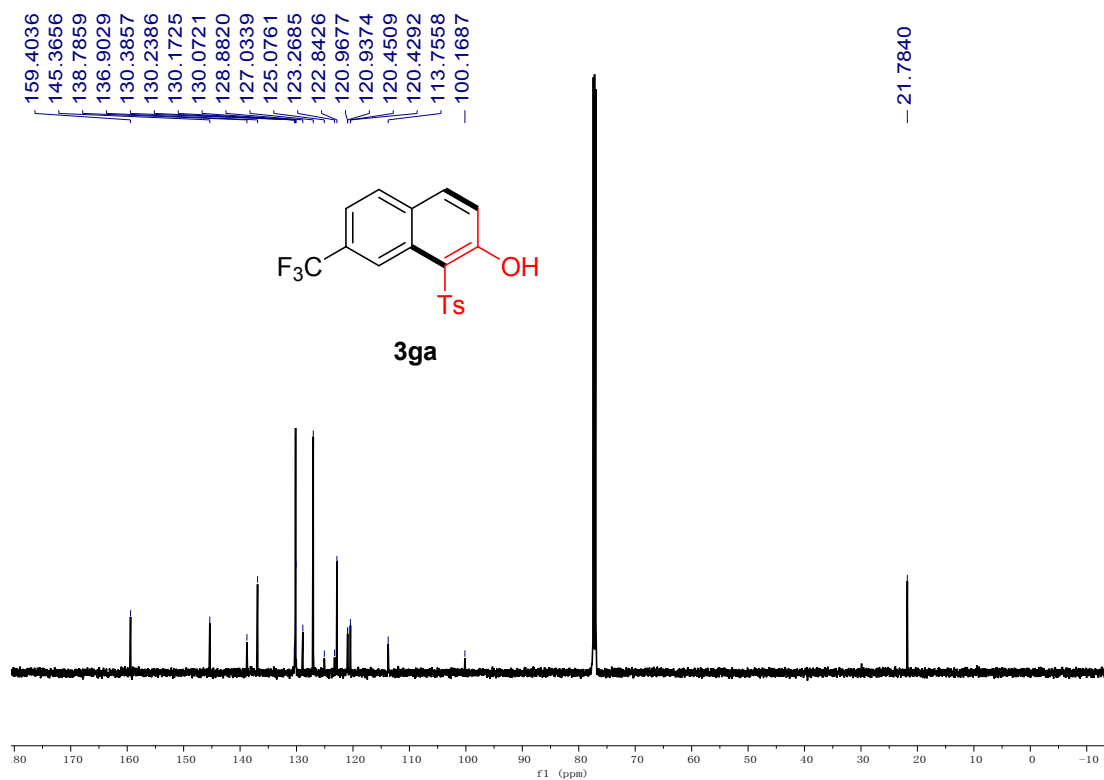

--62.6076

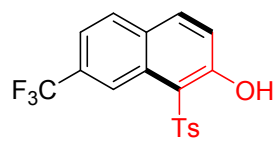

**3ga**

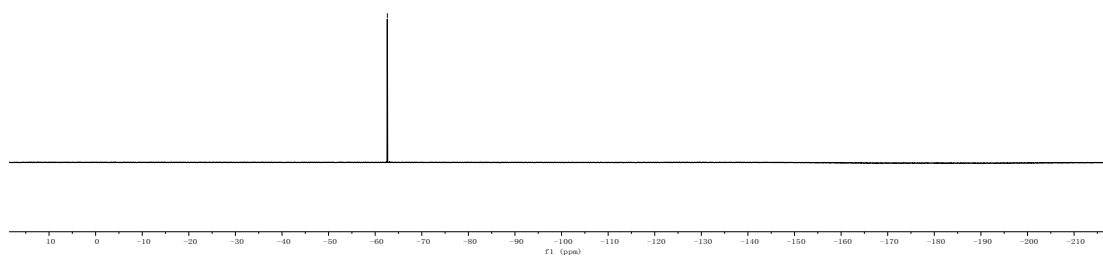

$^1\text{H}$  and  $^{13}\text{C}$  NMR spectra for compound **3ha**

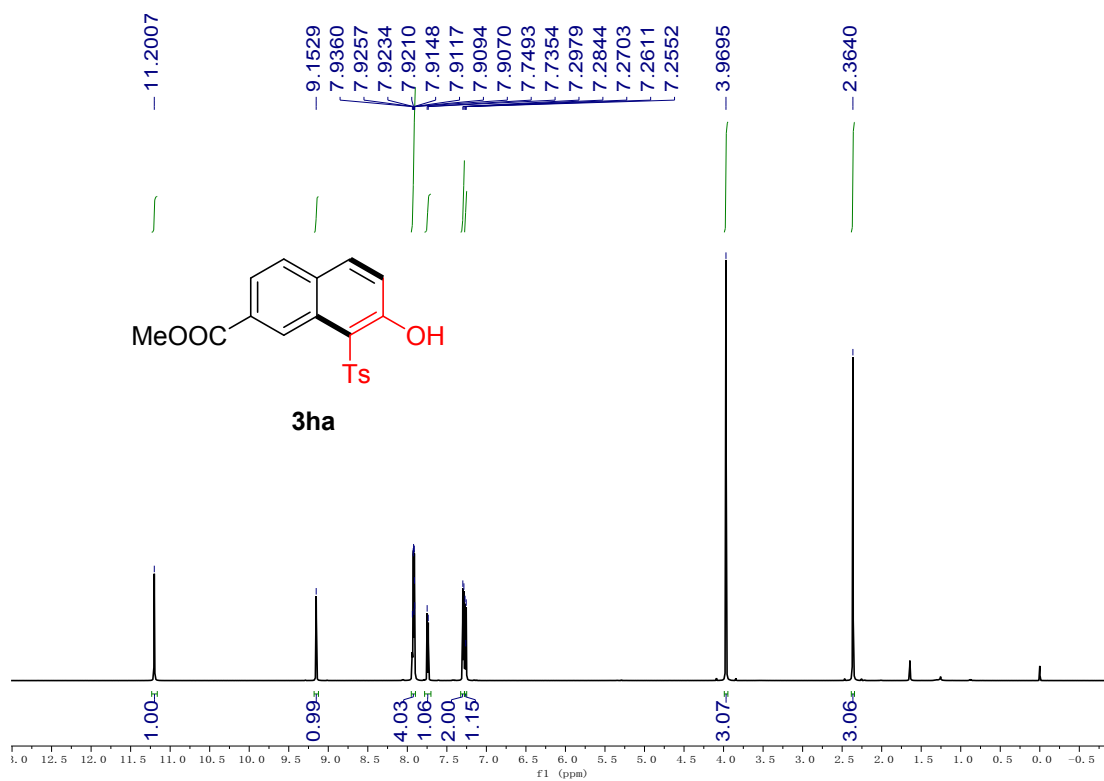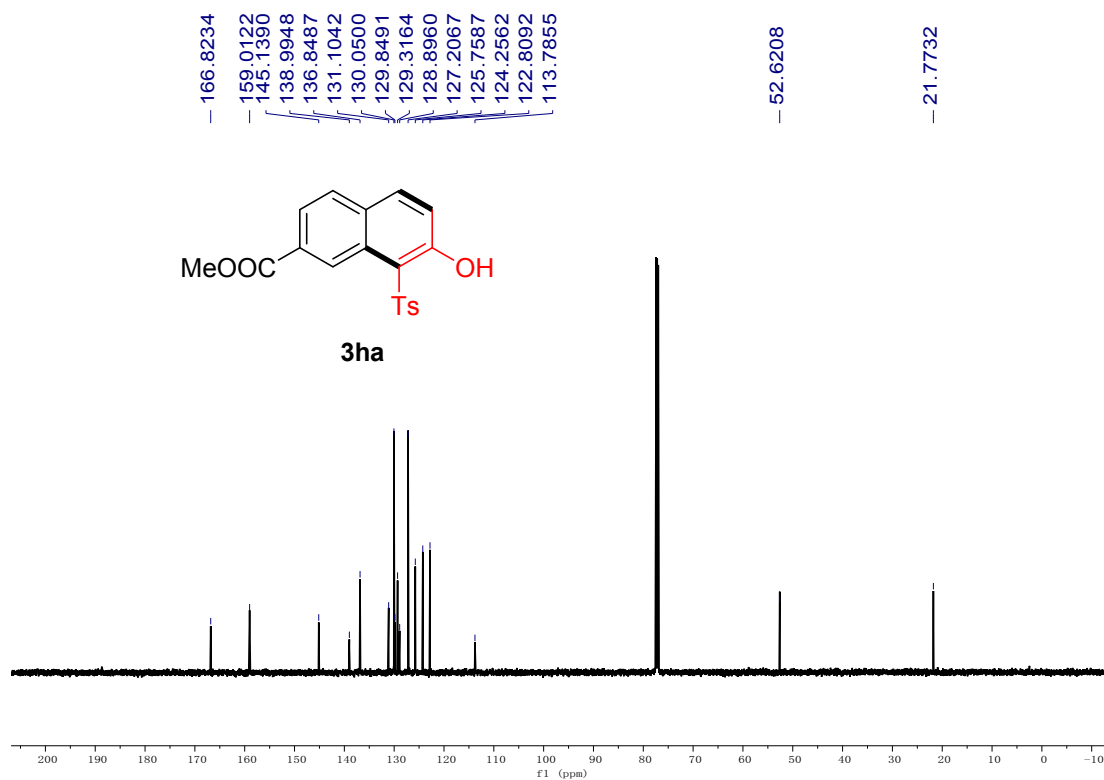

$^1\text{H}$  and  $^{13}\text{C}$  NMR spectra for compound **3ia**

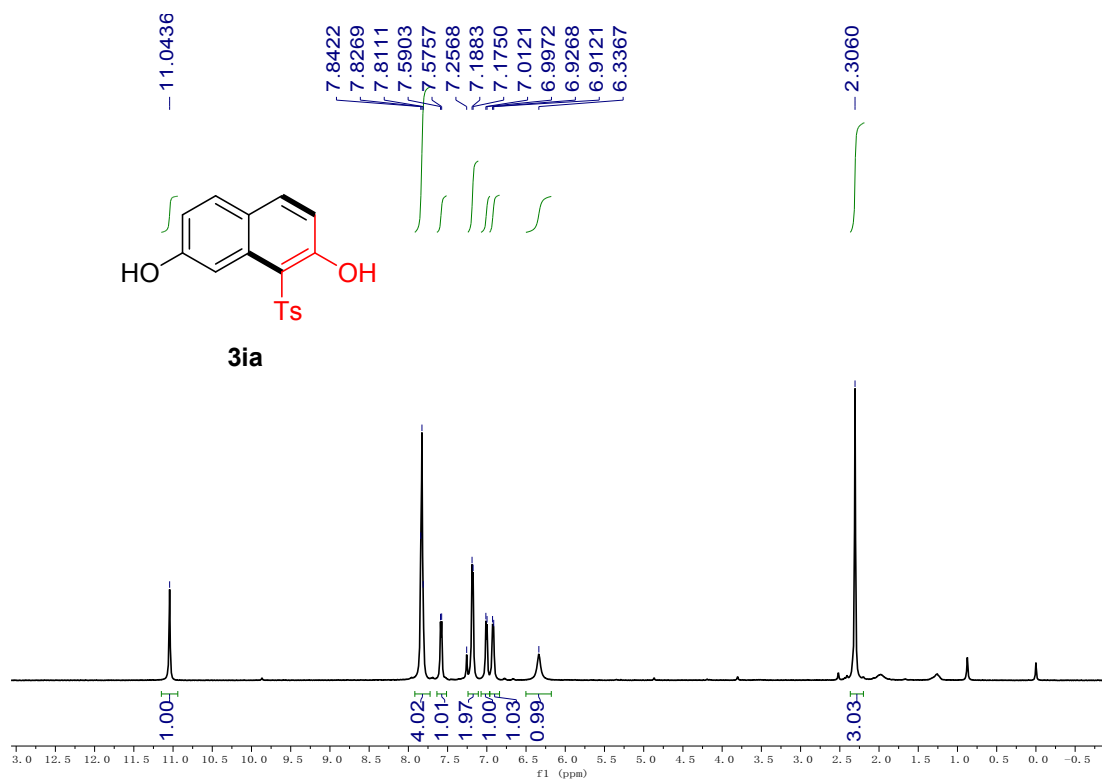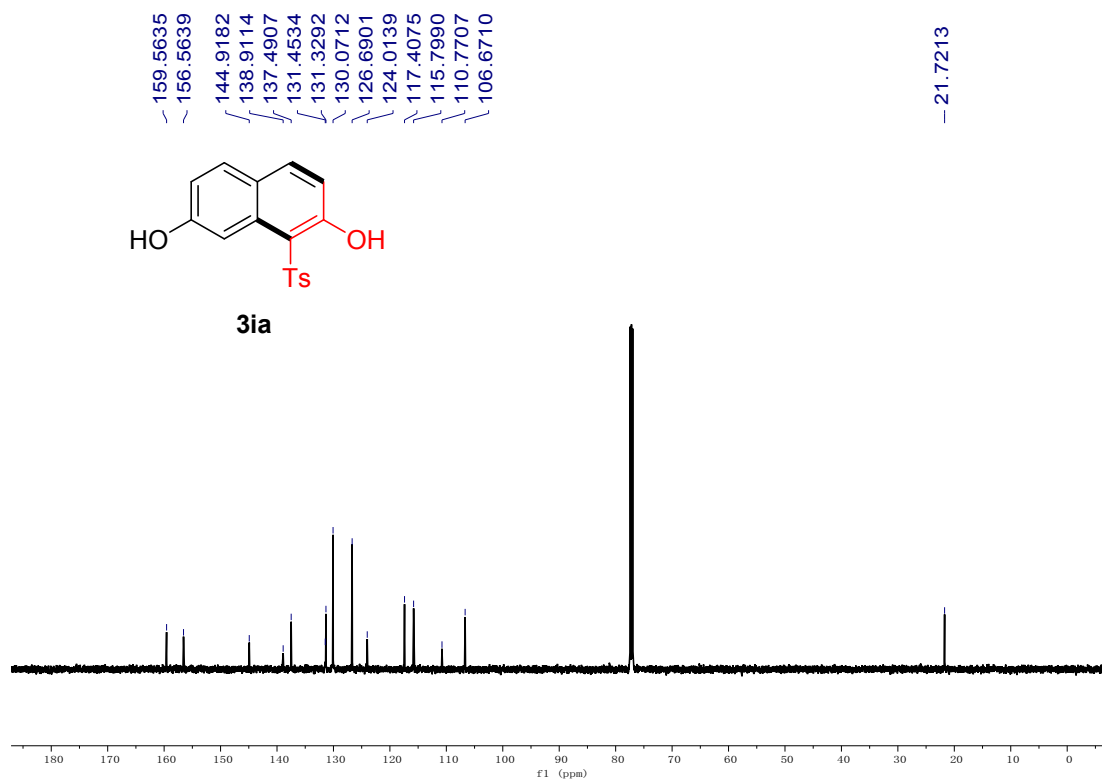

$^1\text{H}$  and  $^{13}\text{C}$  NMR spectra for compound **3ja**

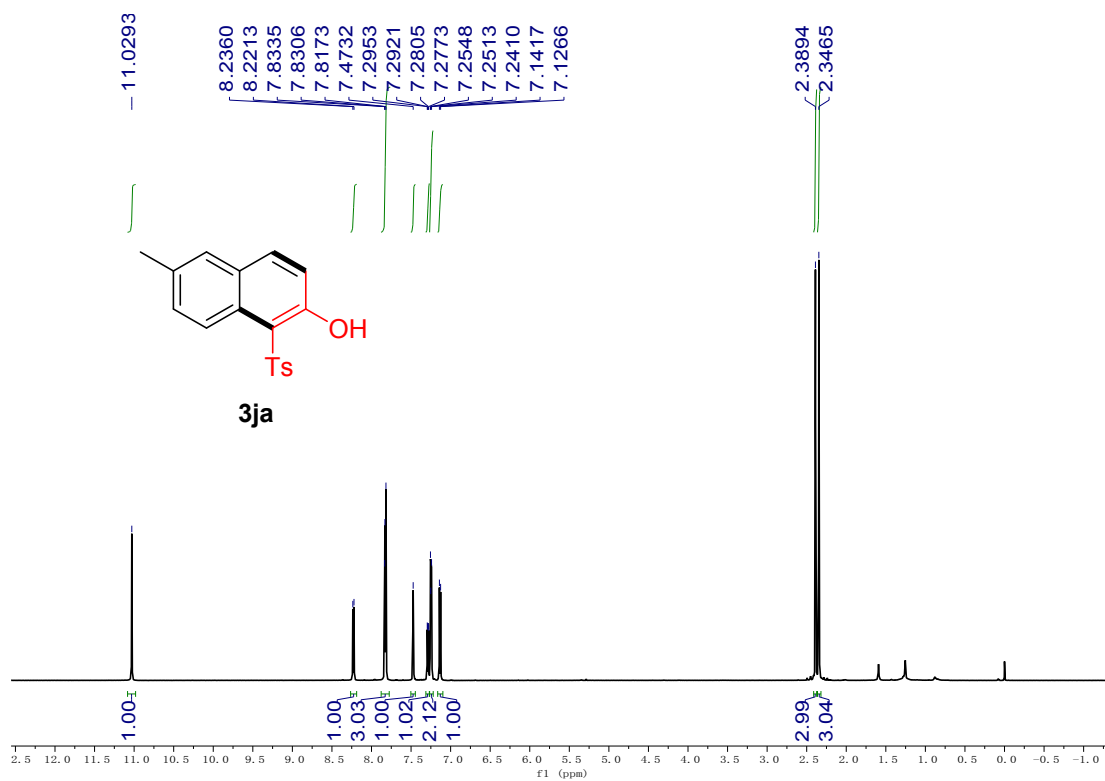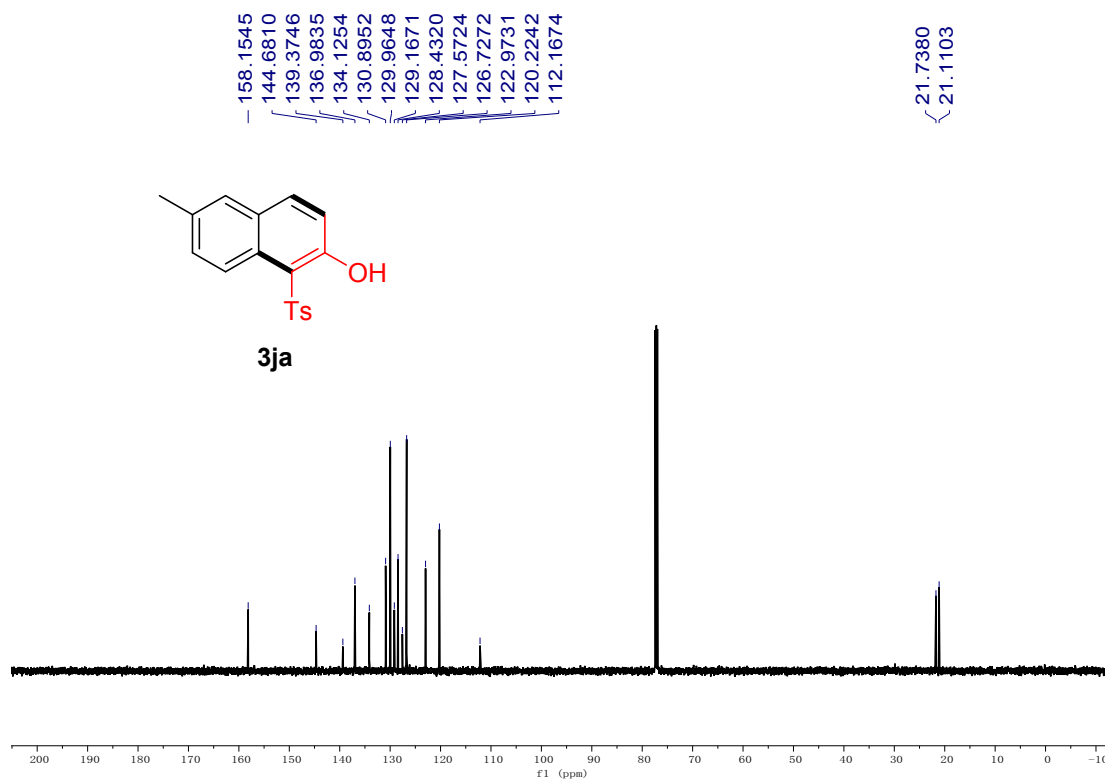

$^1\text{H}$  and  $^{13}\text{C}$  NMR spectra for compound **3ka**

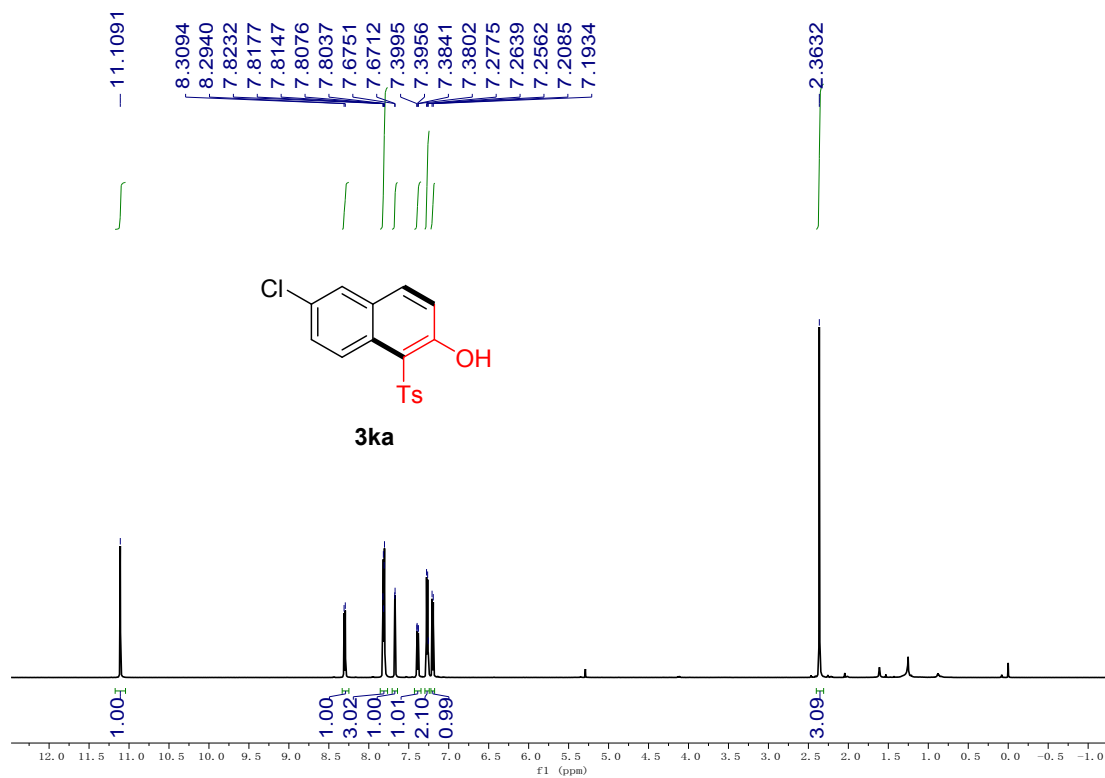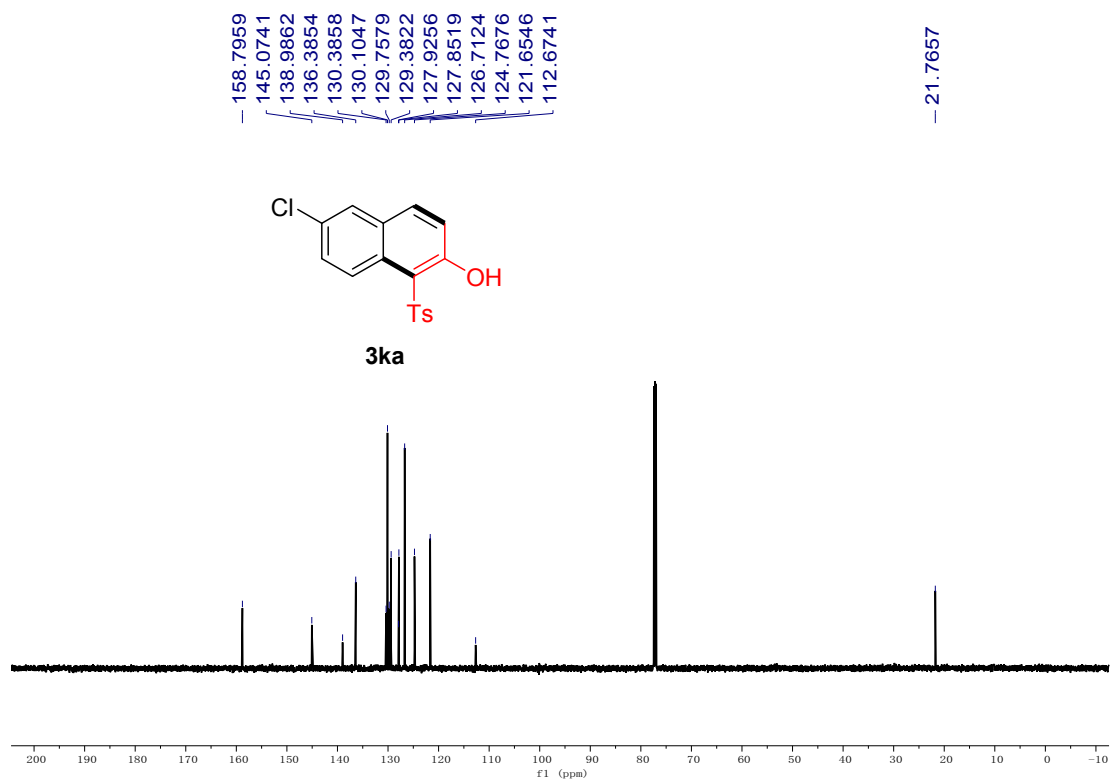



$^1\text{H}$  and  $^{13}\text{C}$  NMR spectra for compound **3la**

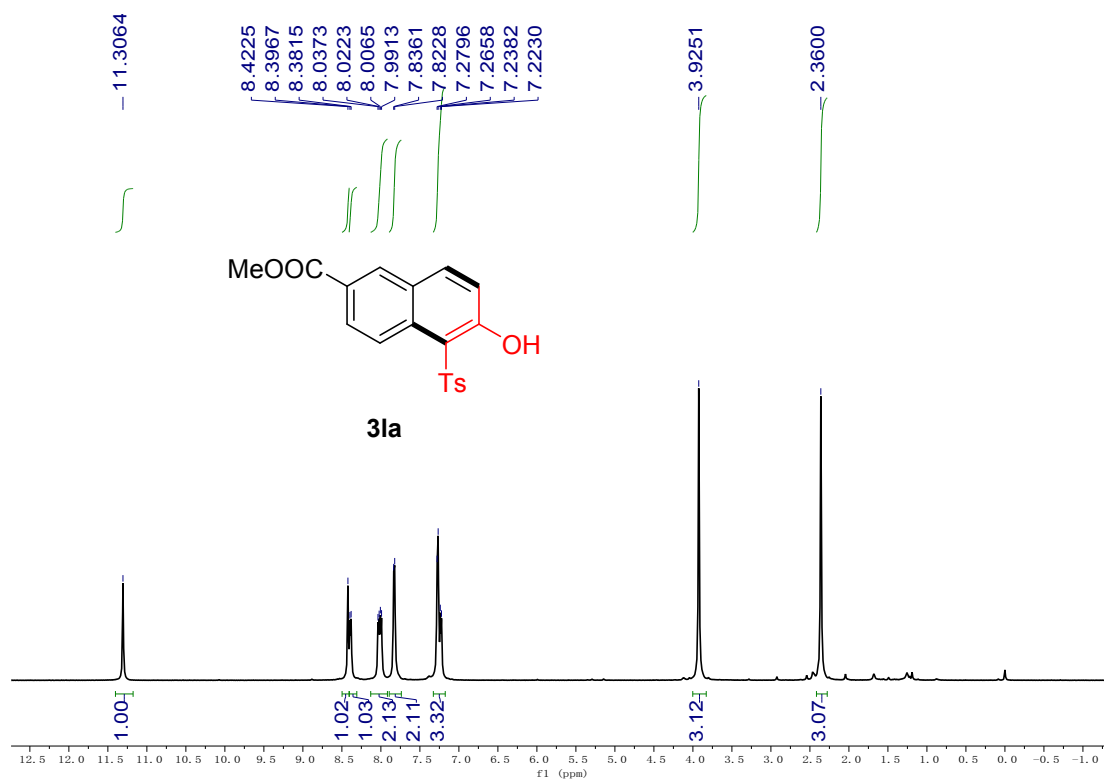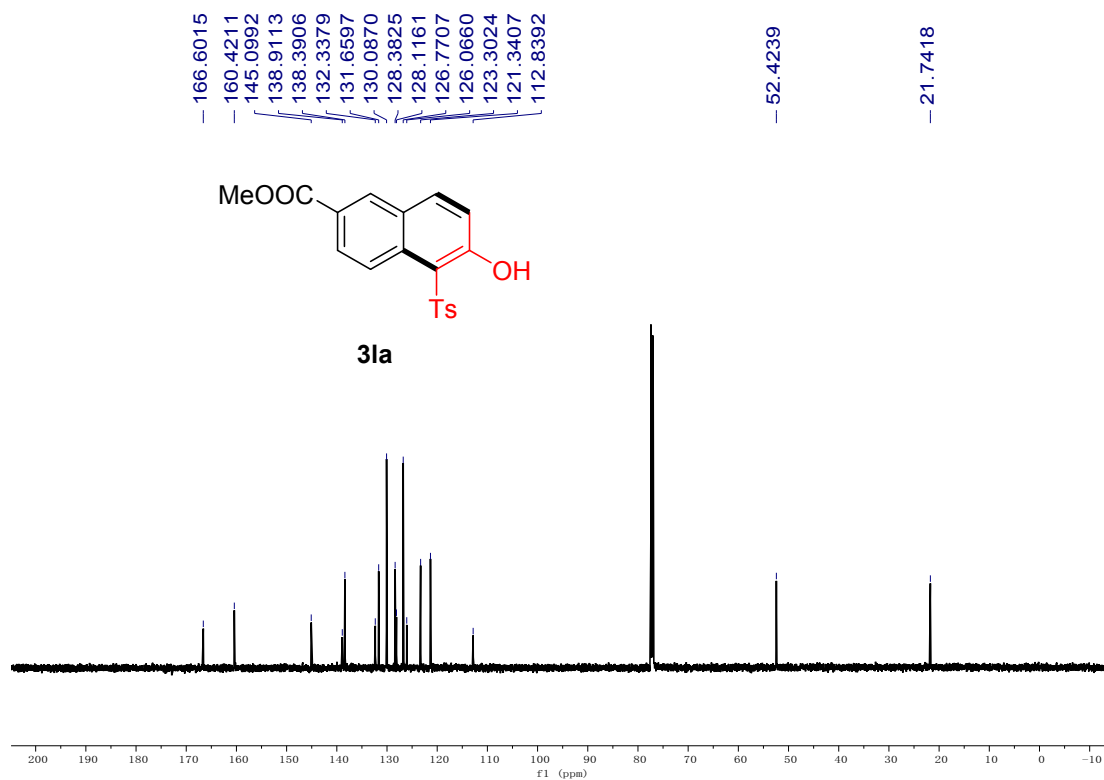

$^1\text{H}$  and  $^{13}\text{C}$  NMR spectra for compound **3ma**

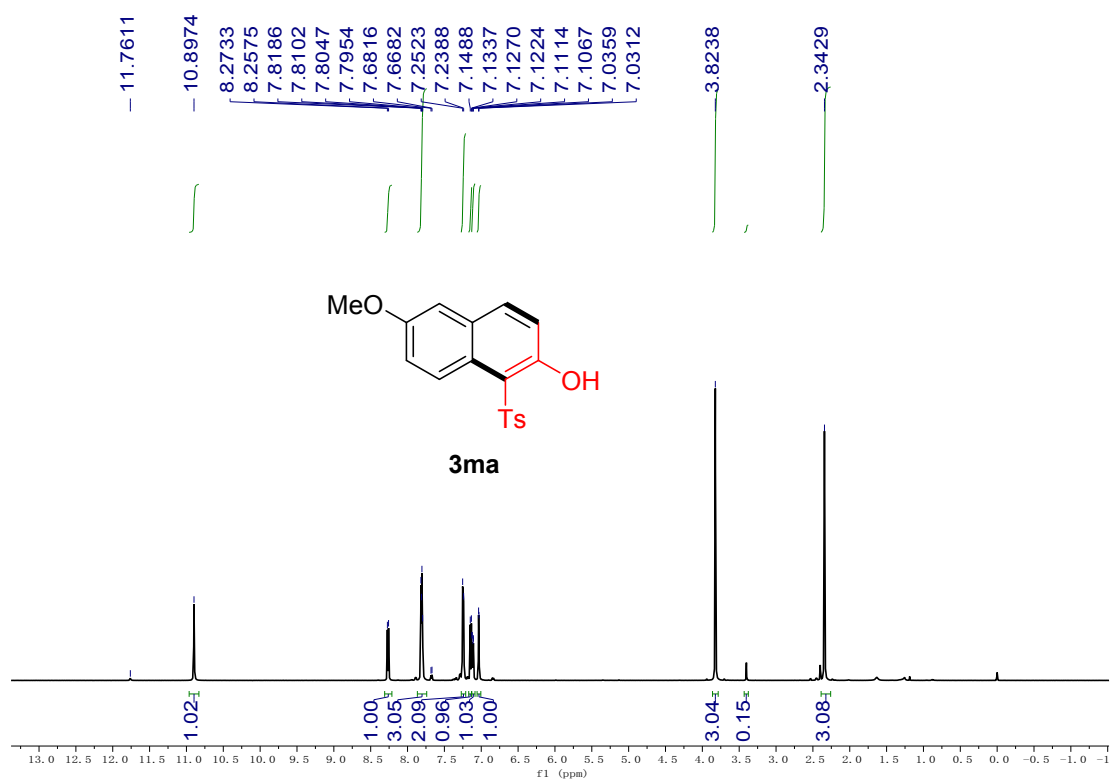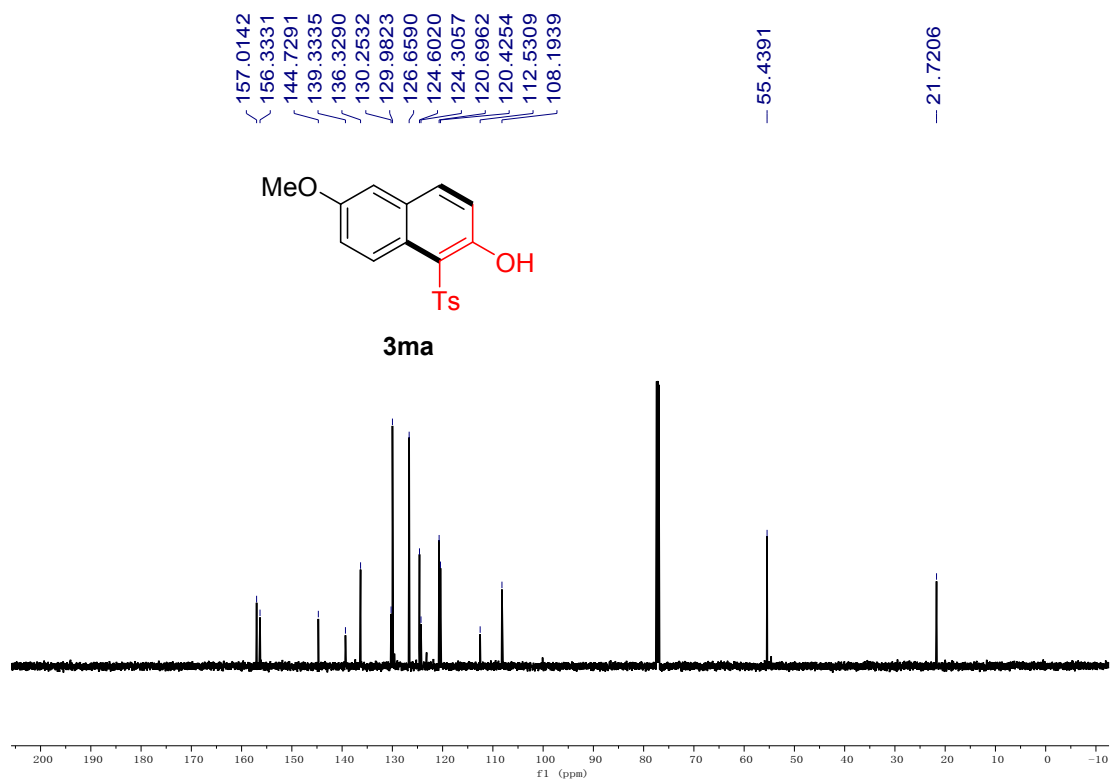

$^1\text{H}$  and  $^{13}\text{C}$  NMR spectra for compound **3na**

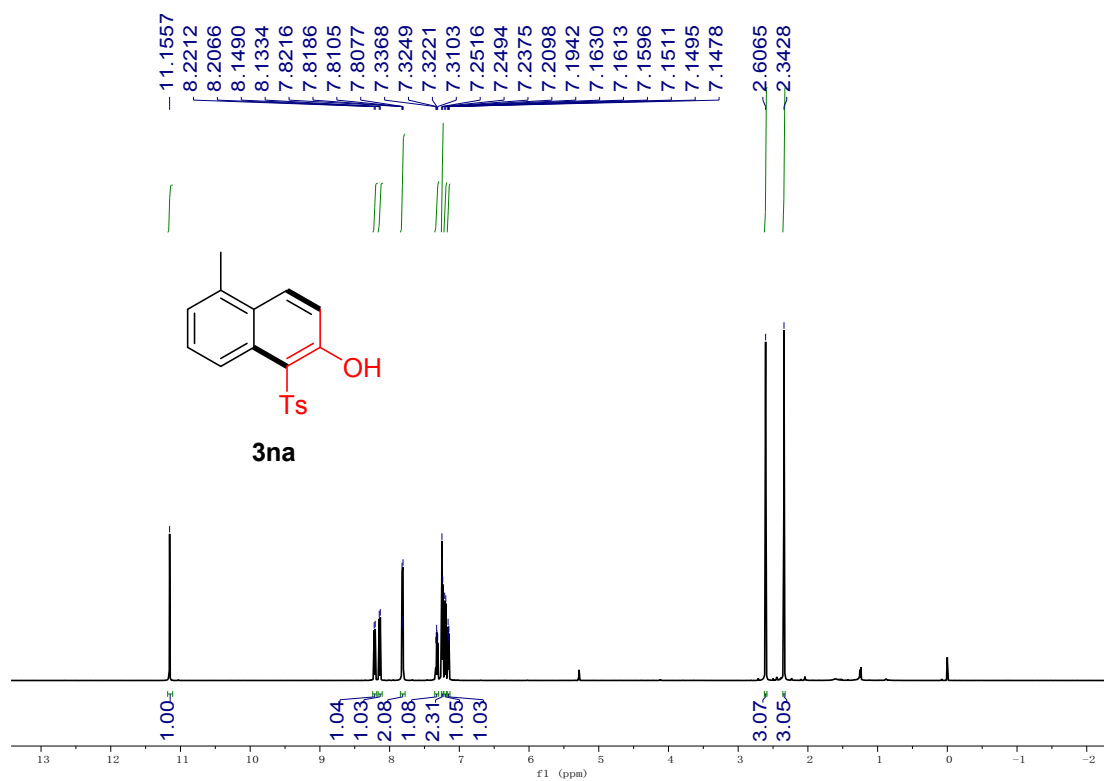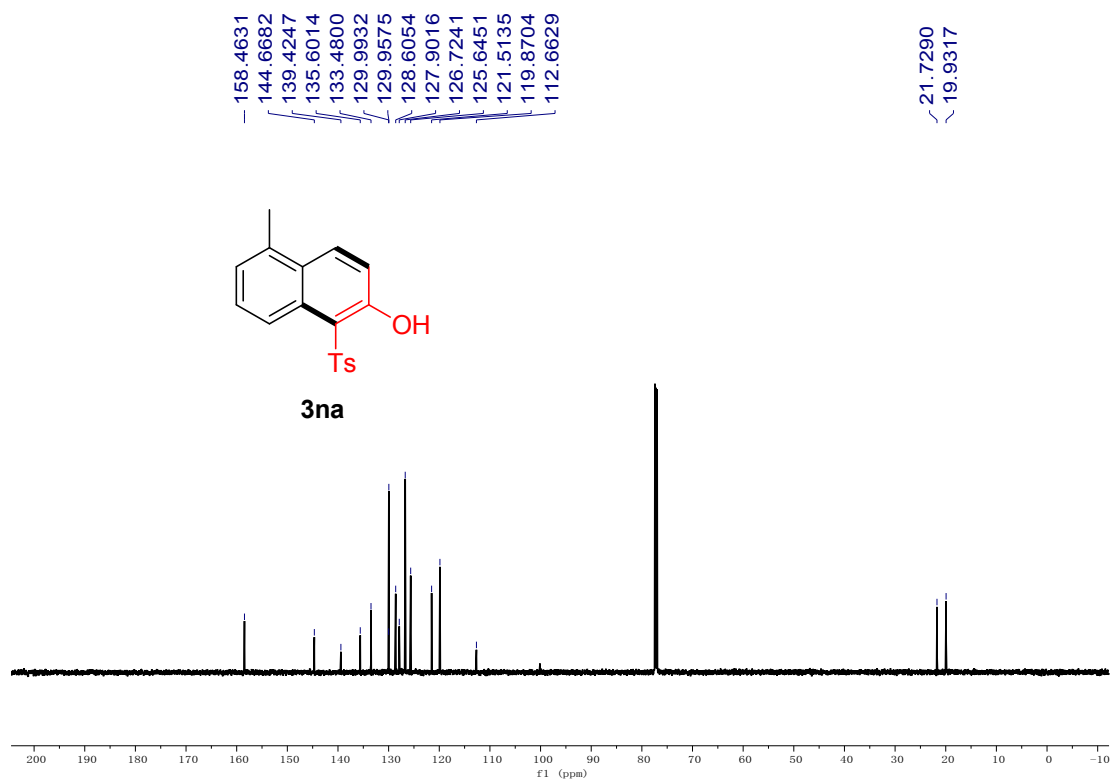

$^1\text{H}$  and  $^{13}\text{C}$  NMR spectra for compound **30a**

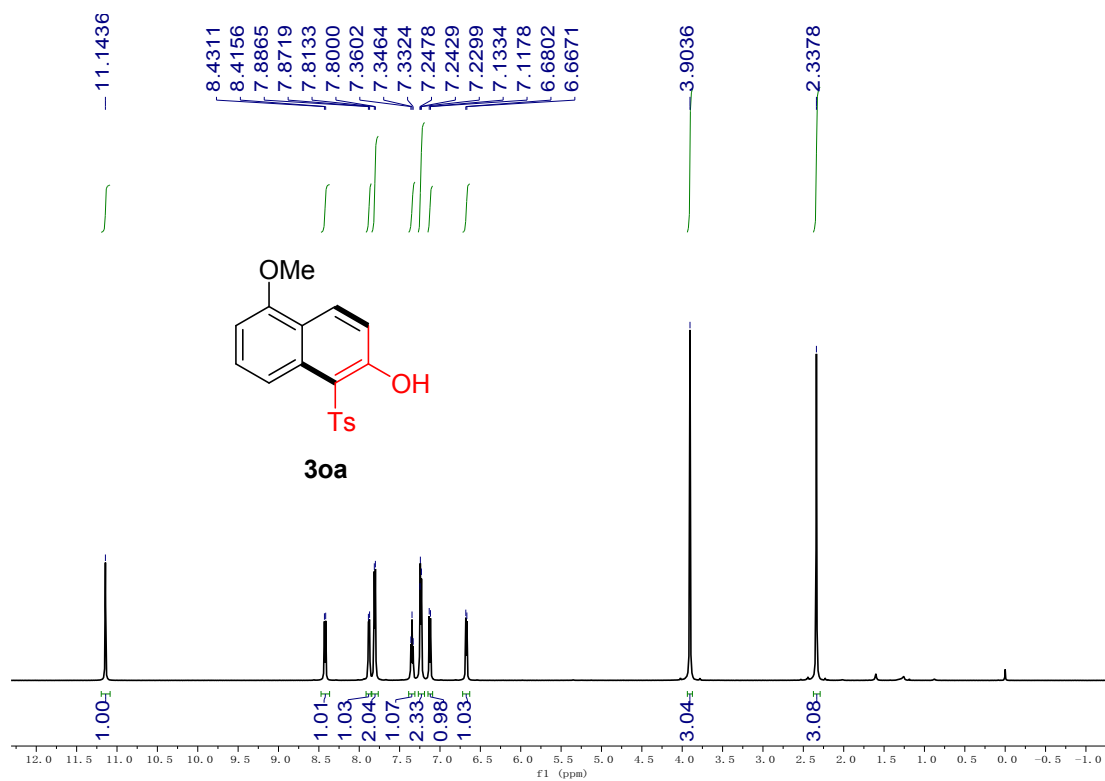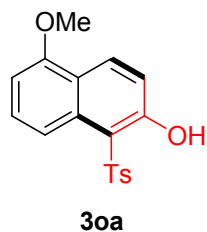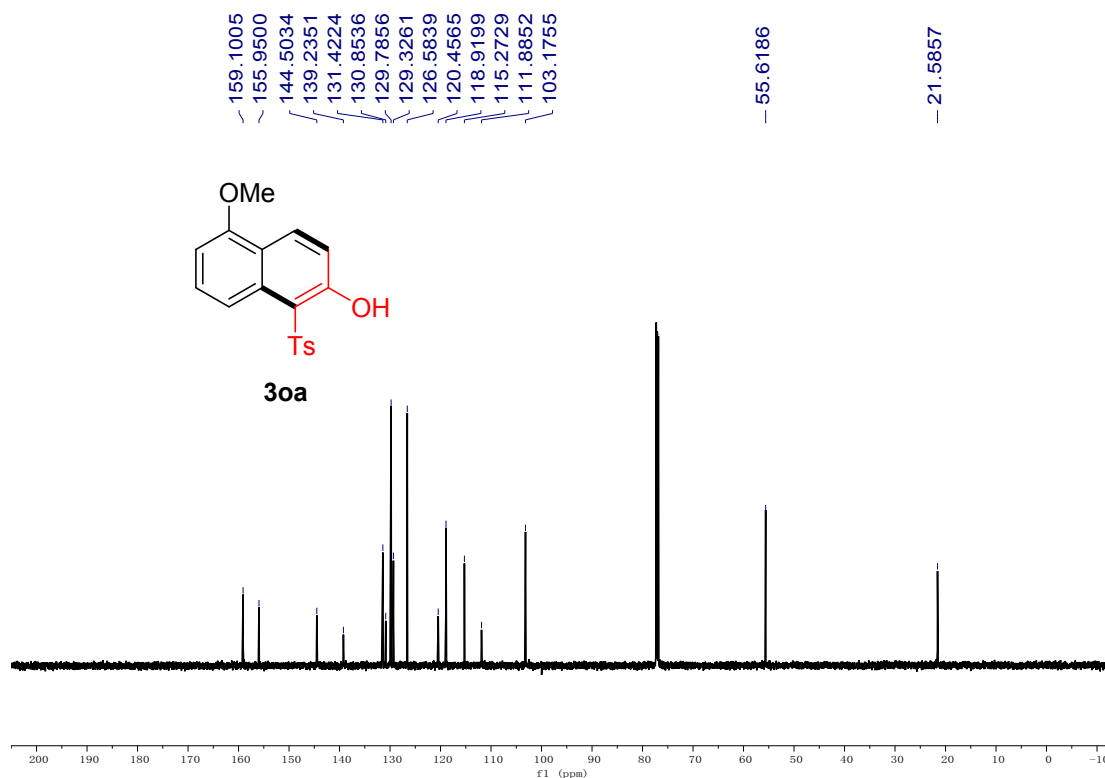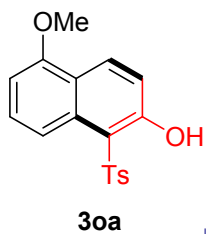

$^1\text{H}$ ,  $^{13}\text{C}$  and  $^{19}\text{F}$  NMR spectra for compound **3pa**

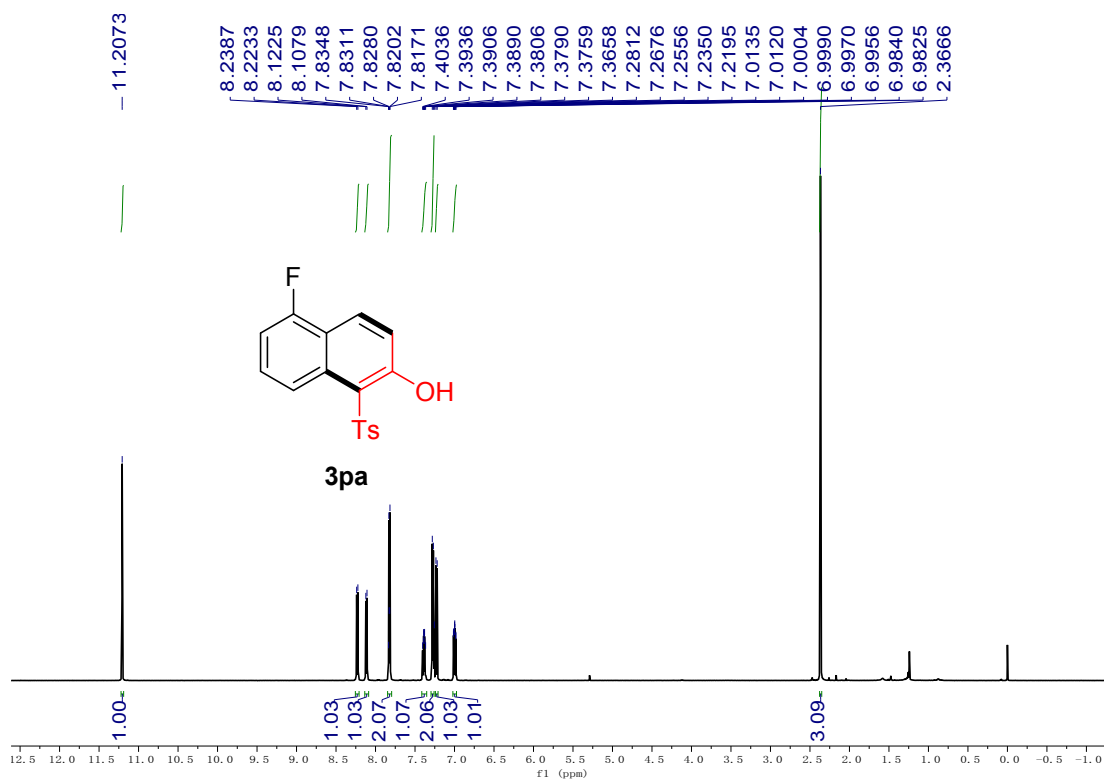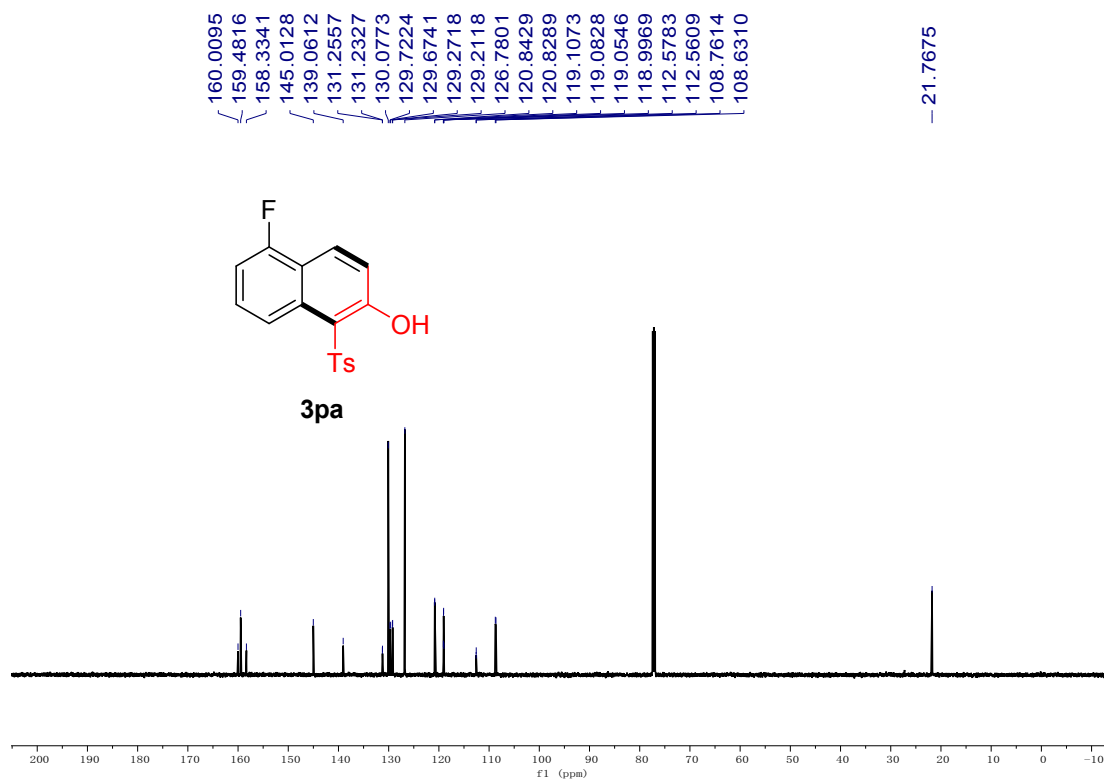

--120.7638

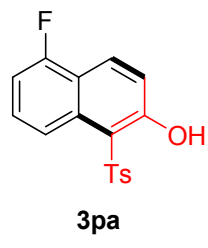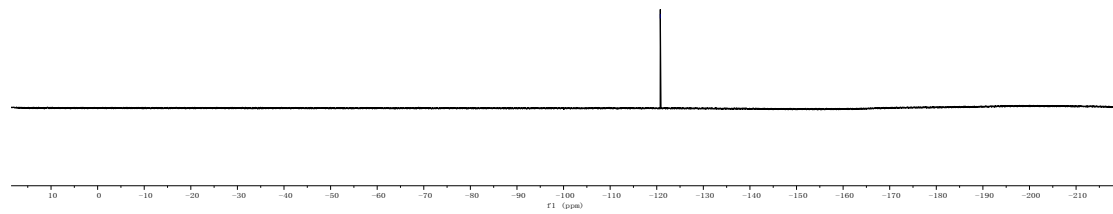

$^1\text{H}$  and  $^{13}\text{C}$  NMR spectra for compound **3qa**

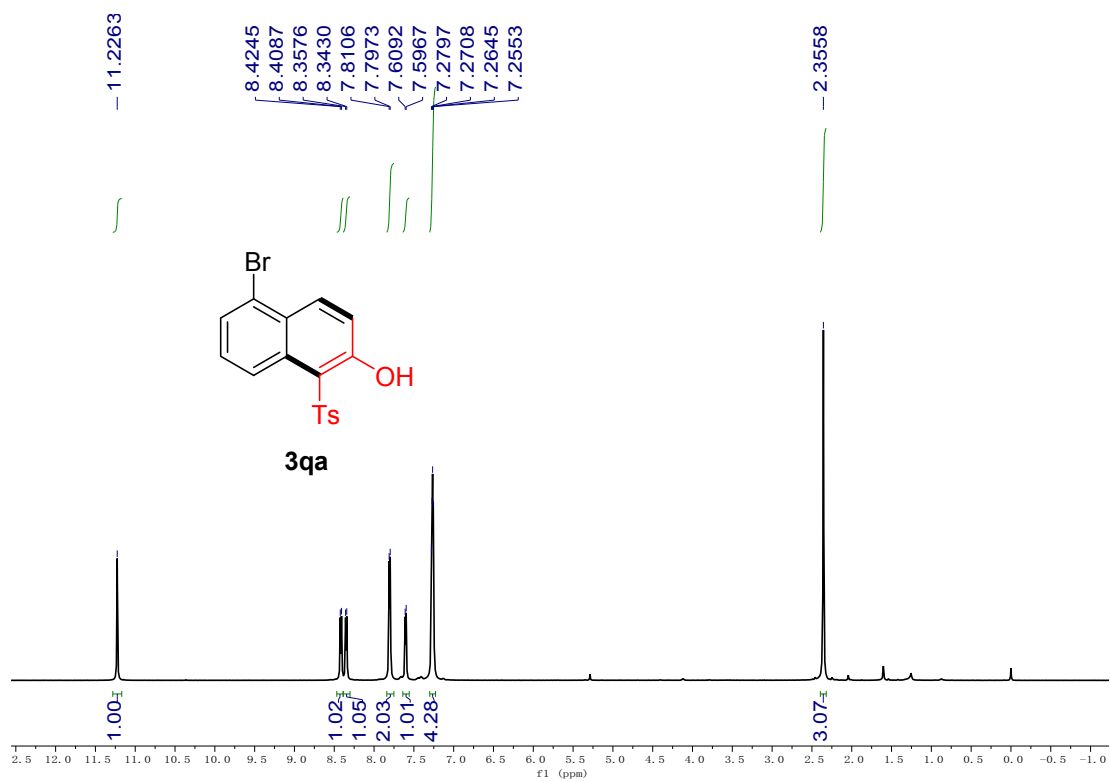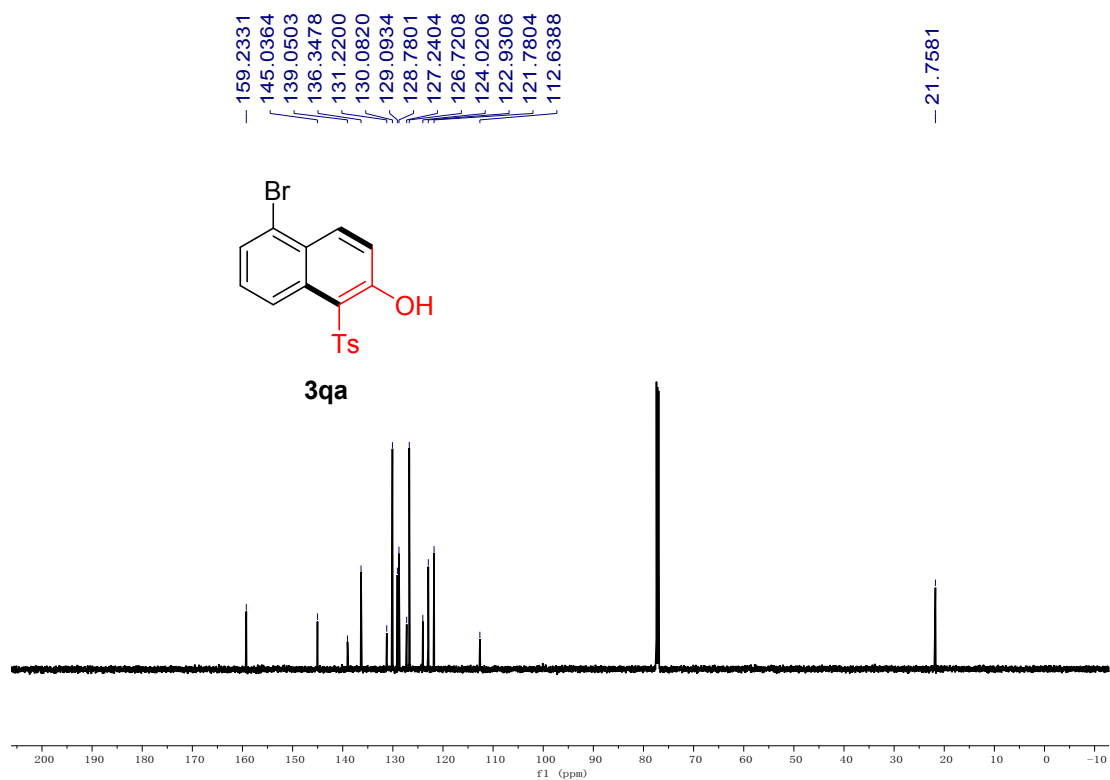

$^1\text{H}$ ,  $^{13}\text{C}$  and  $^{19}\text{F}$  NMR spectra for compound **3ra**

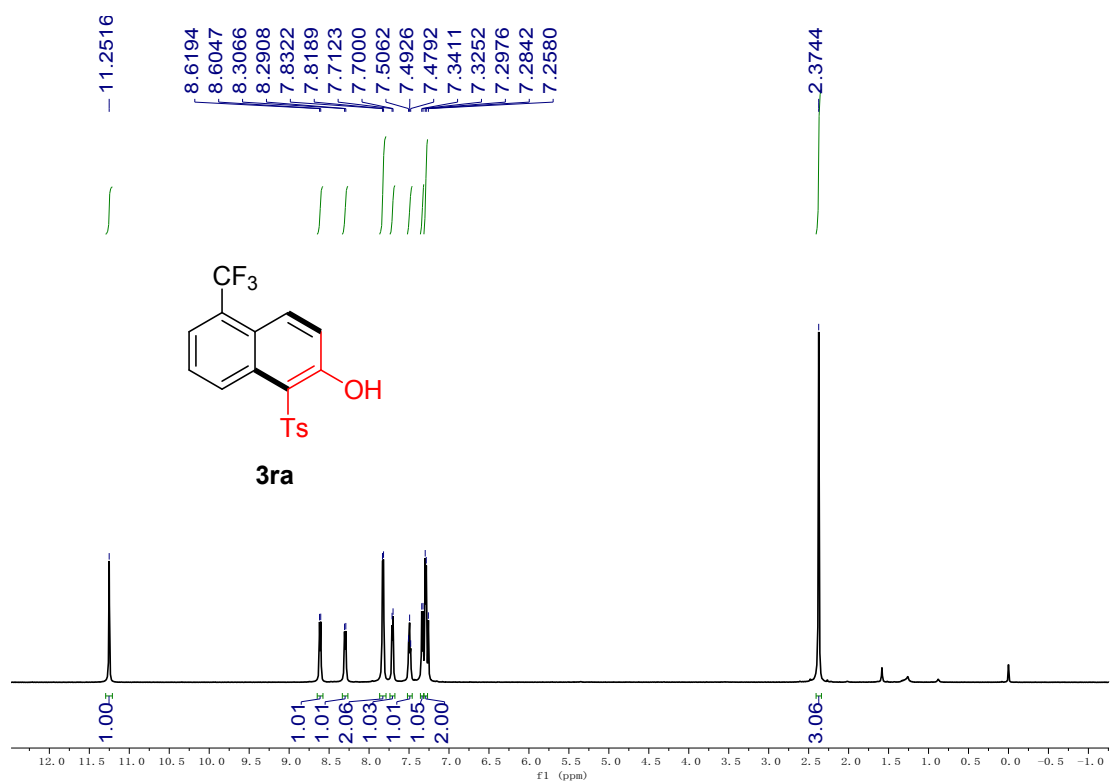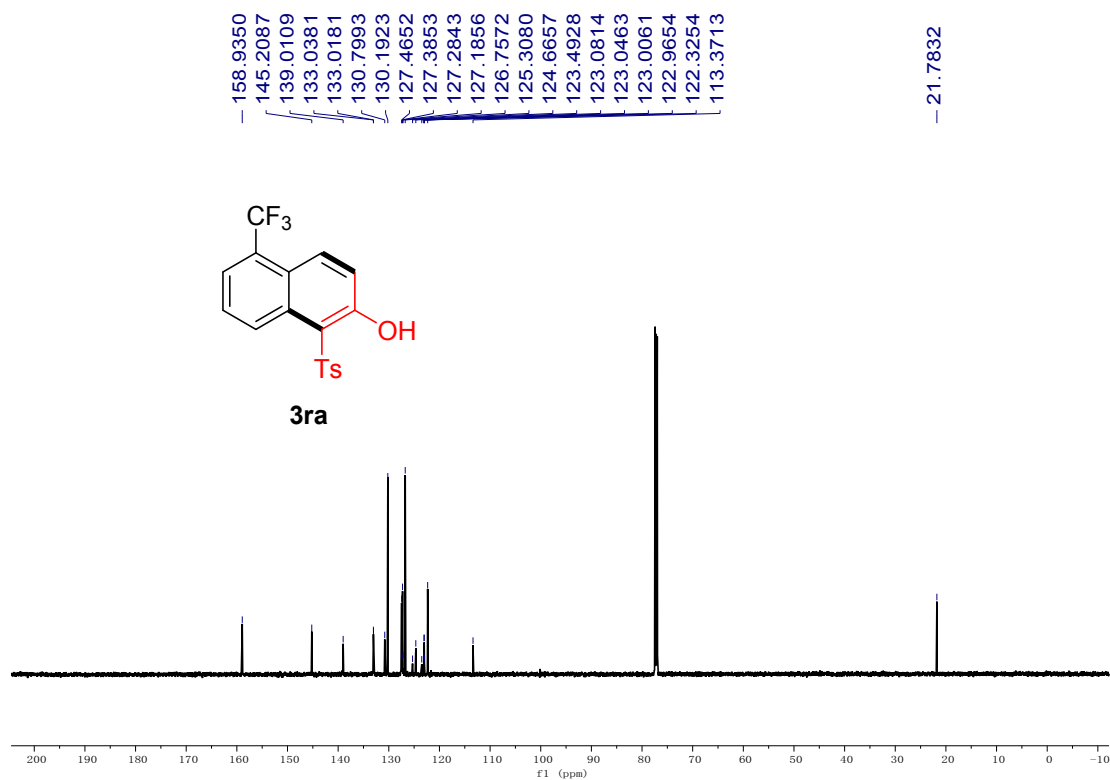



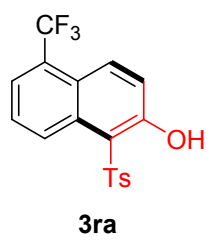

--58.7807

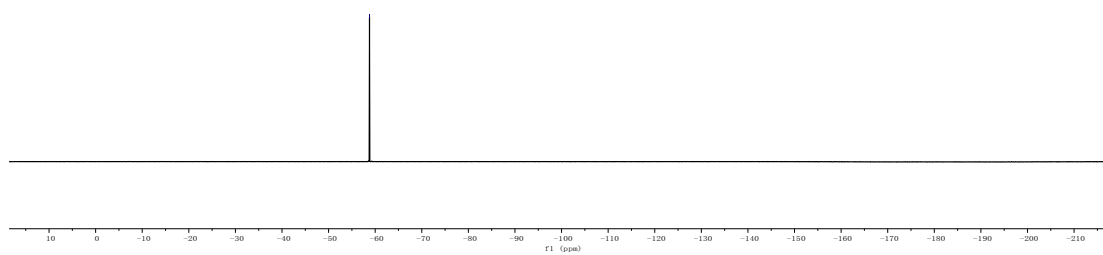

$^1\text{H}$  and  $^{13}\text{C}$  NMR spectra for compound **3sa**

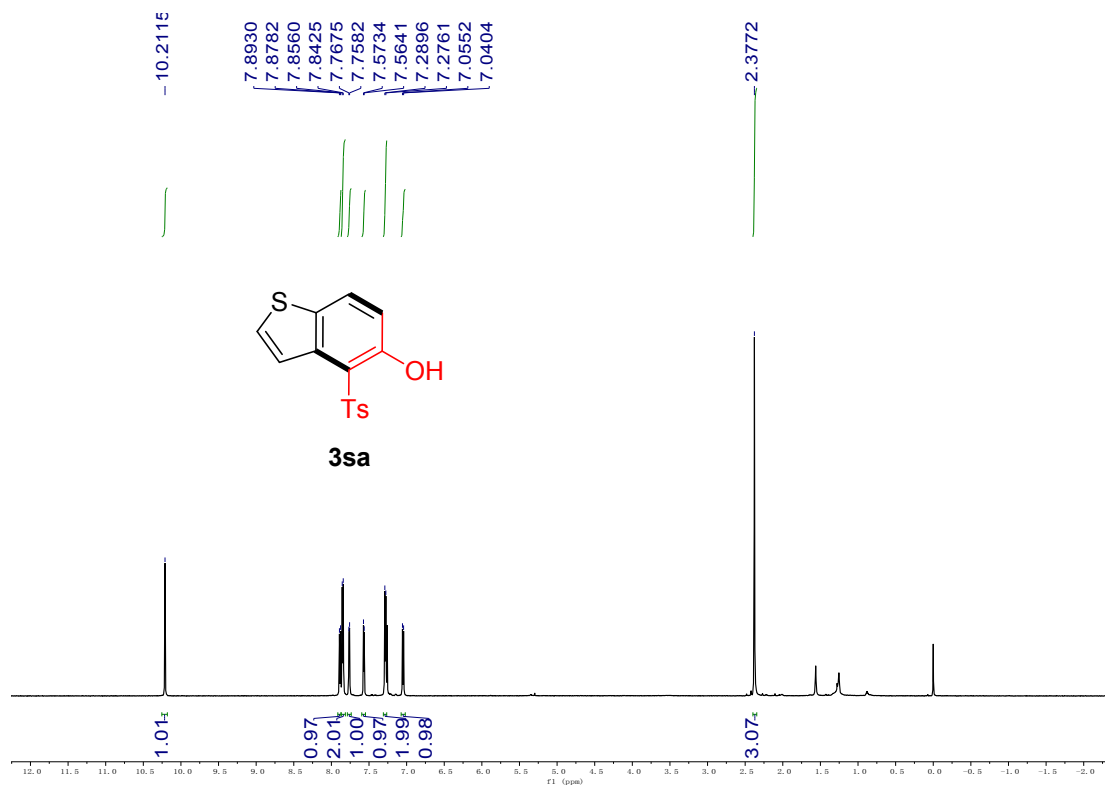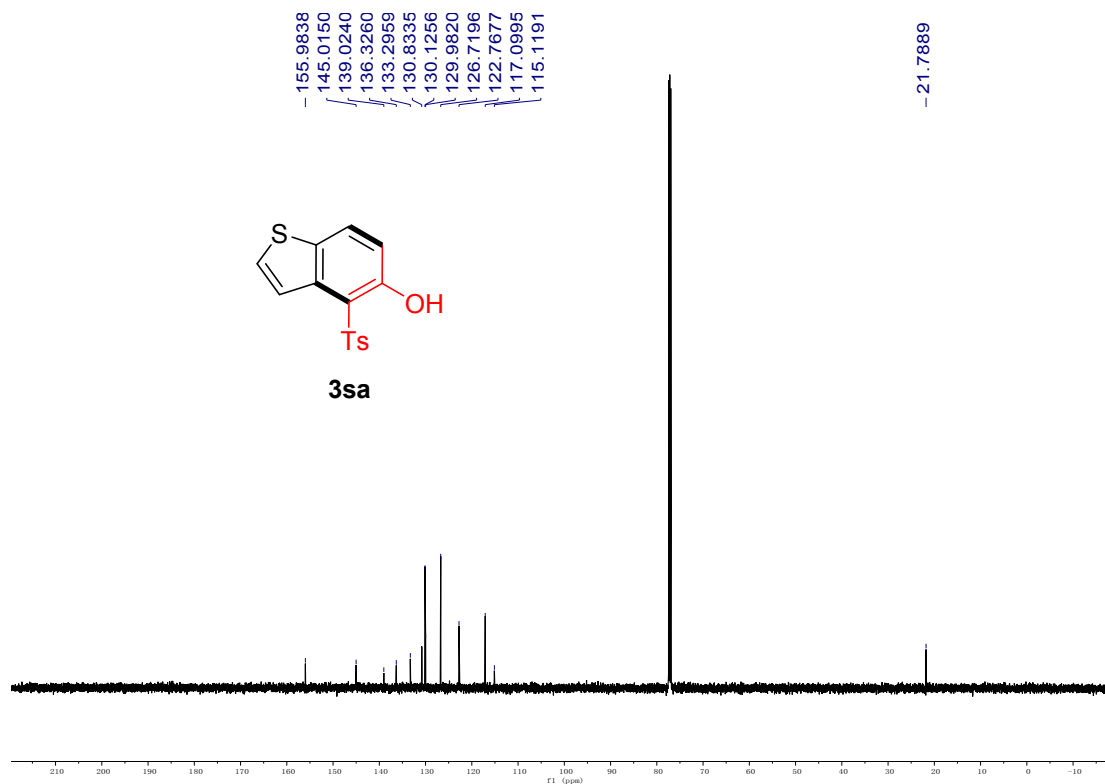

<sup>1</sup>H and <sup>13</sup>C NMR spectra for compound **3ta**

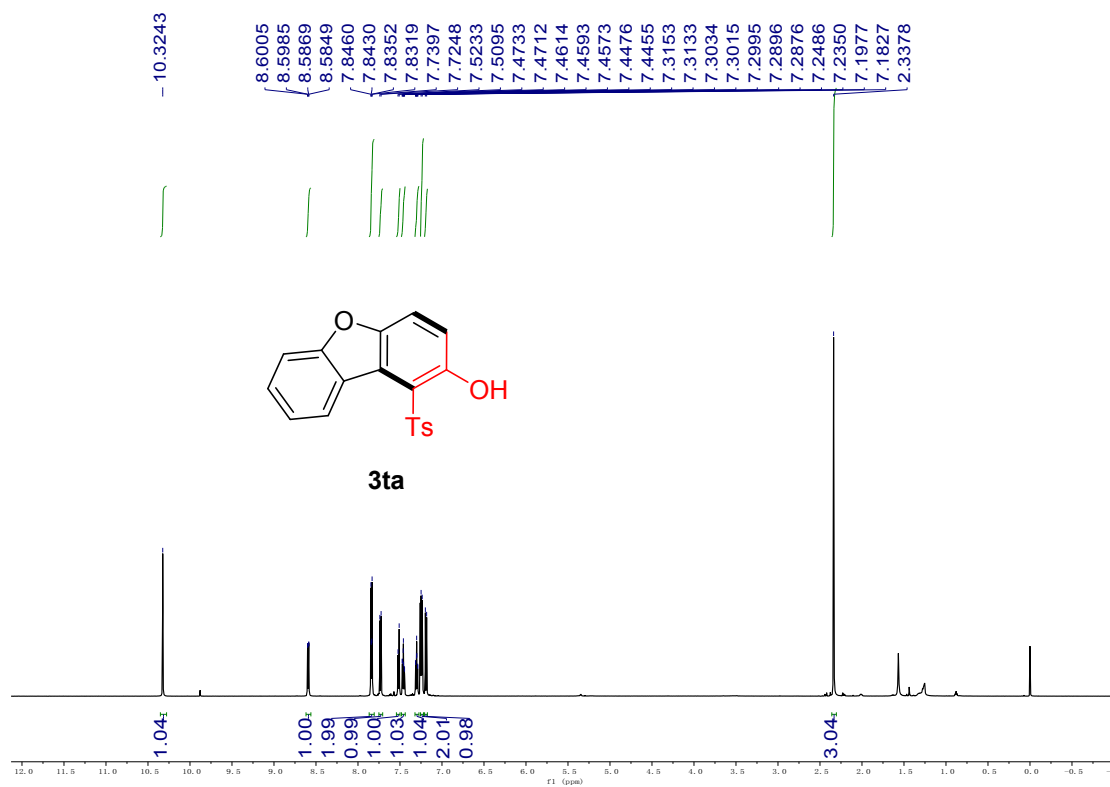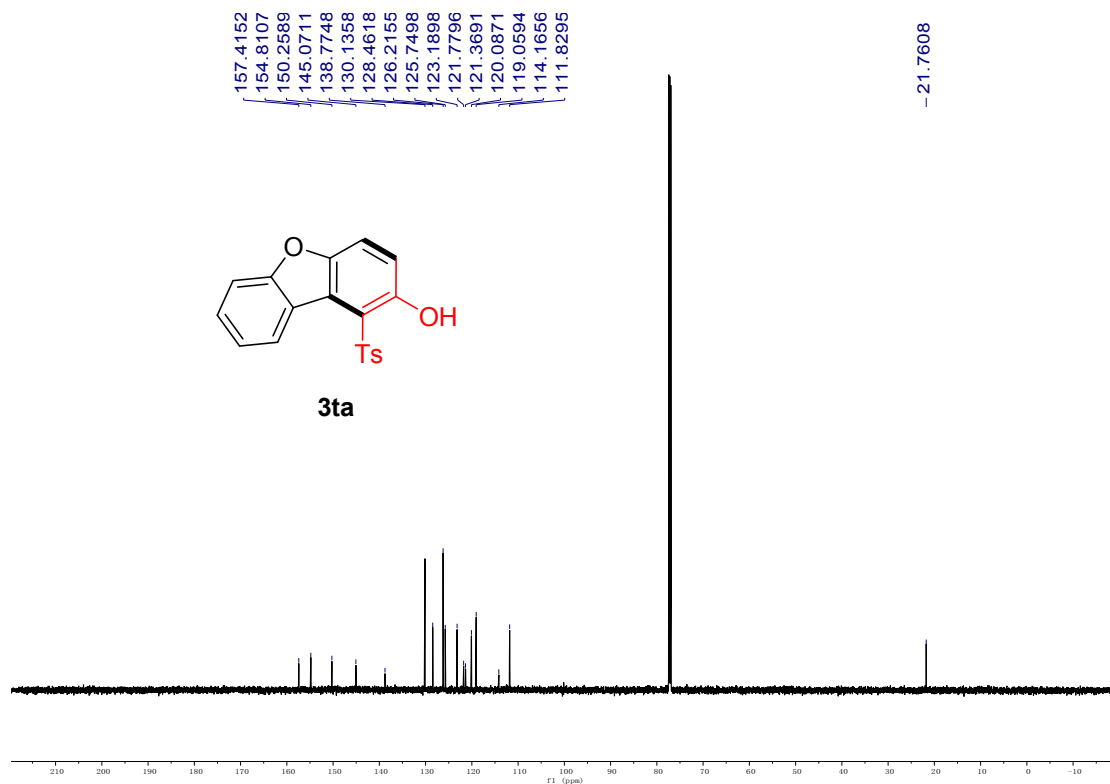

$^1\text{H}$  and  $^{13}\text{C}$  NMR spectra for compound **3ua**

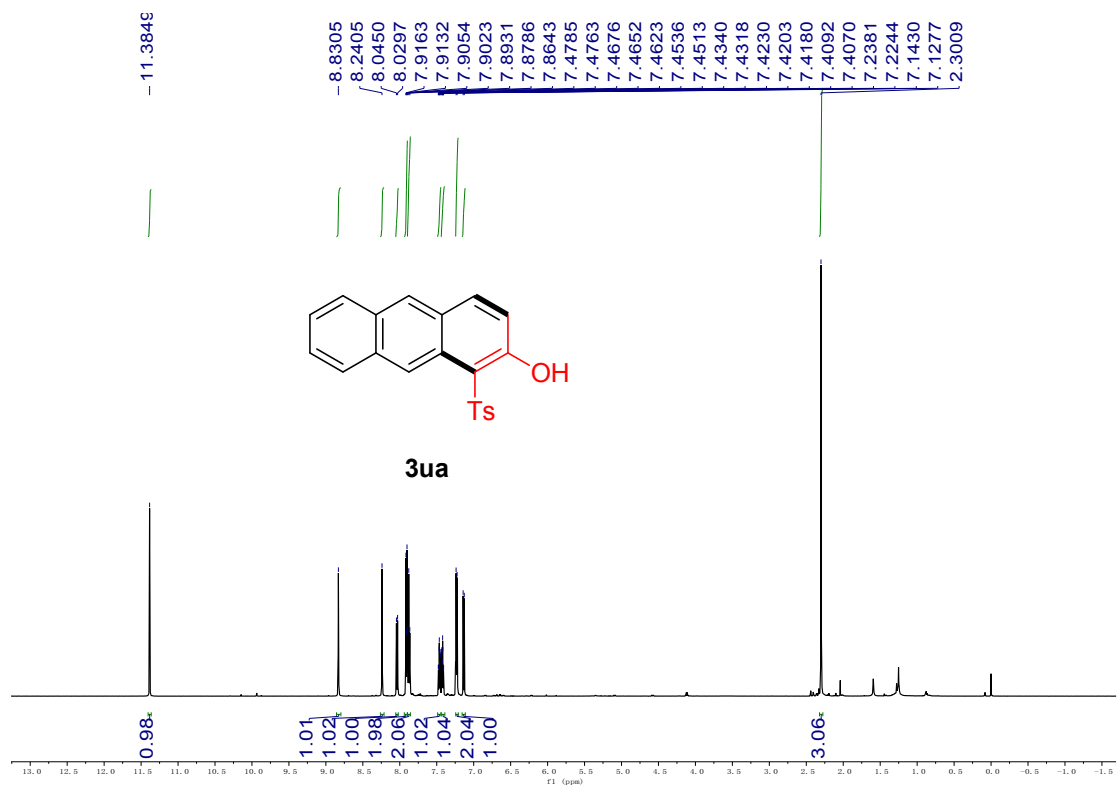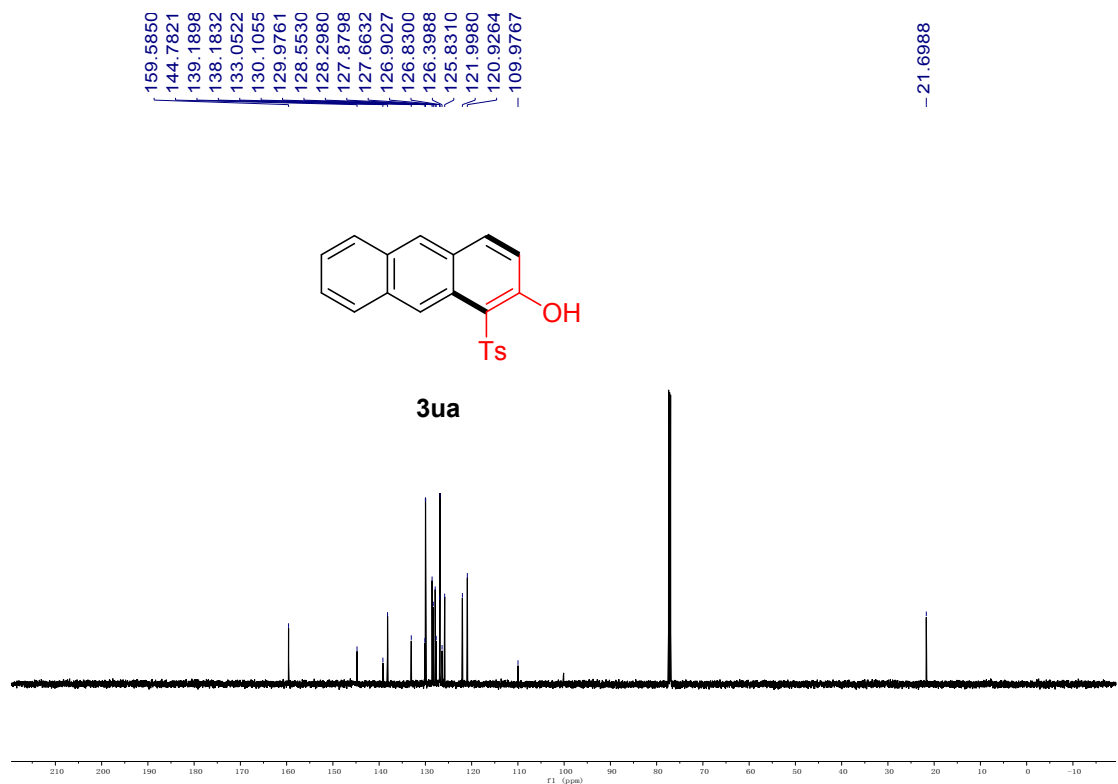

<sup>1</sup>H and <sup>13</sup>C NMR spectra for compound **3va**

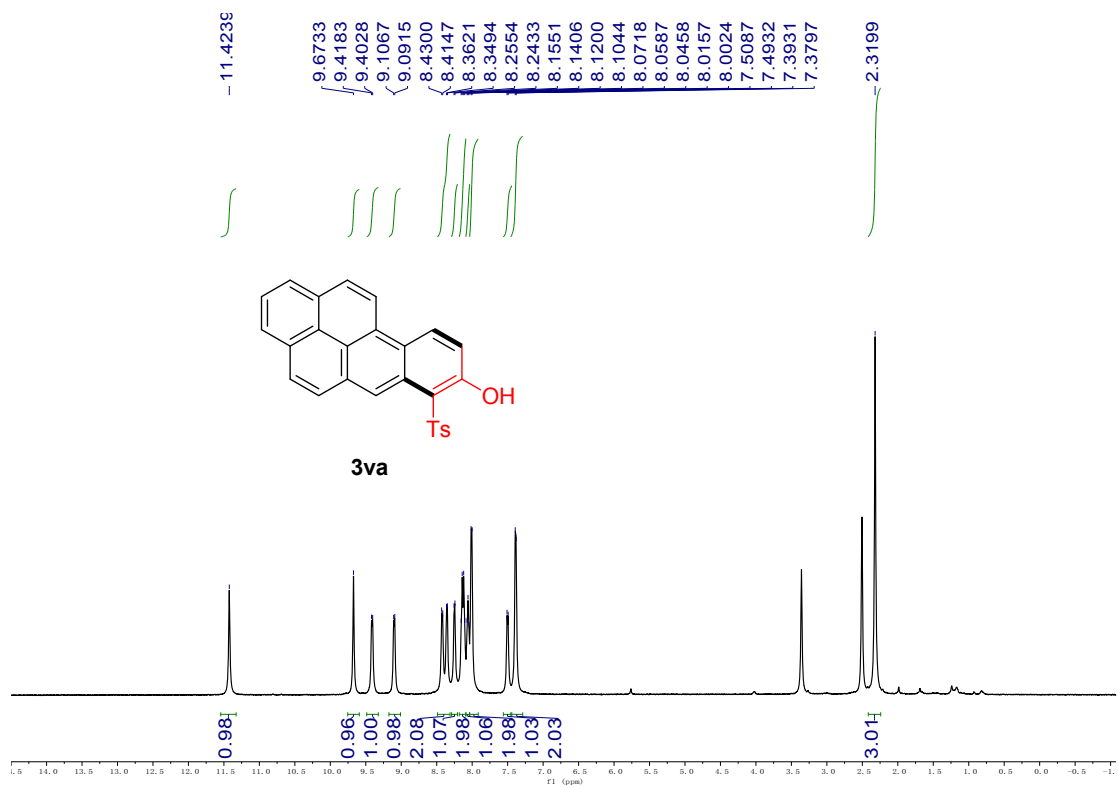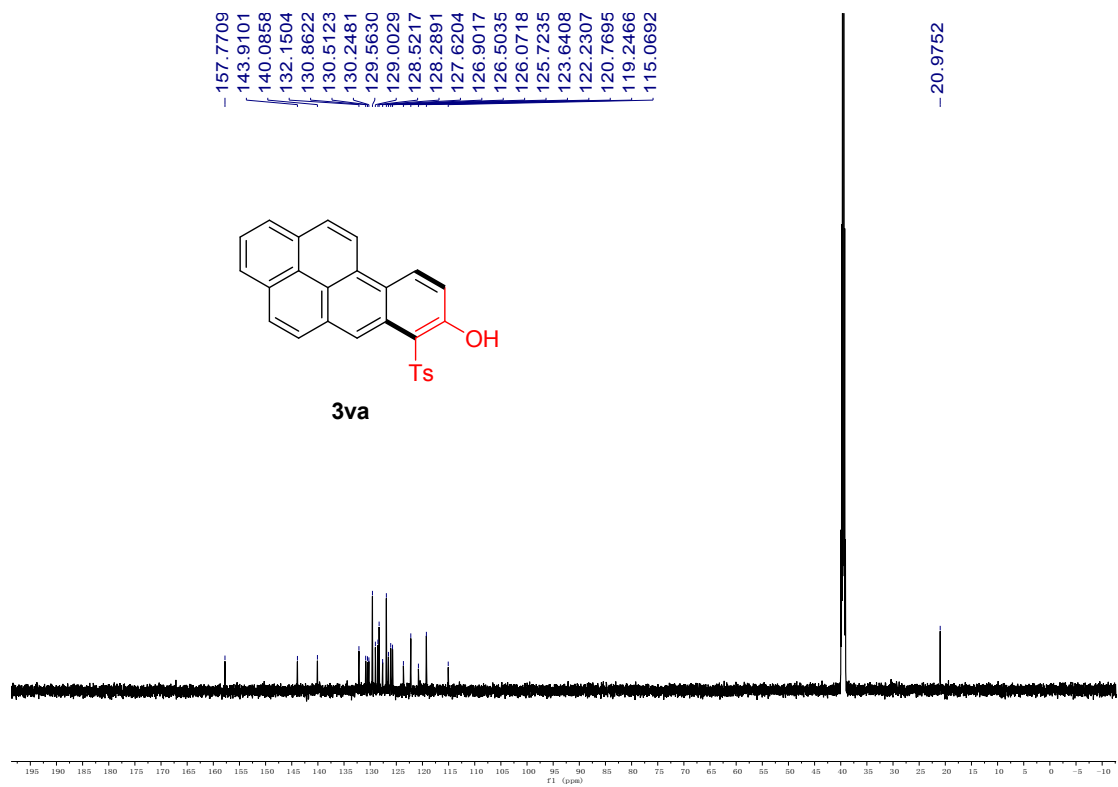

$^1\text{H}$ ,  $^{13}\text{C}$  and  $^{19}\text{F}$  NMR spectra for compound **3ab**

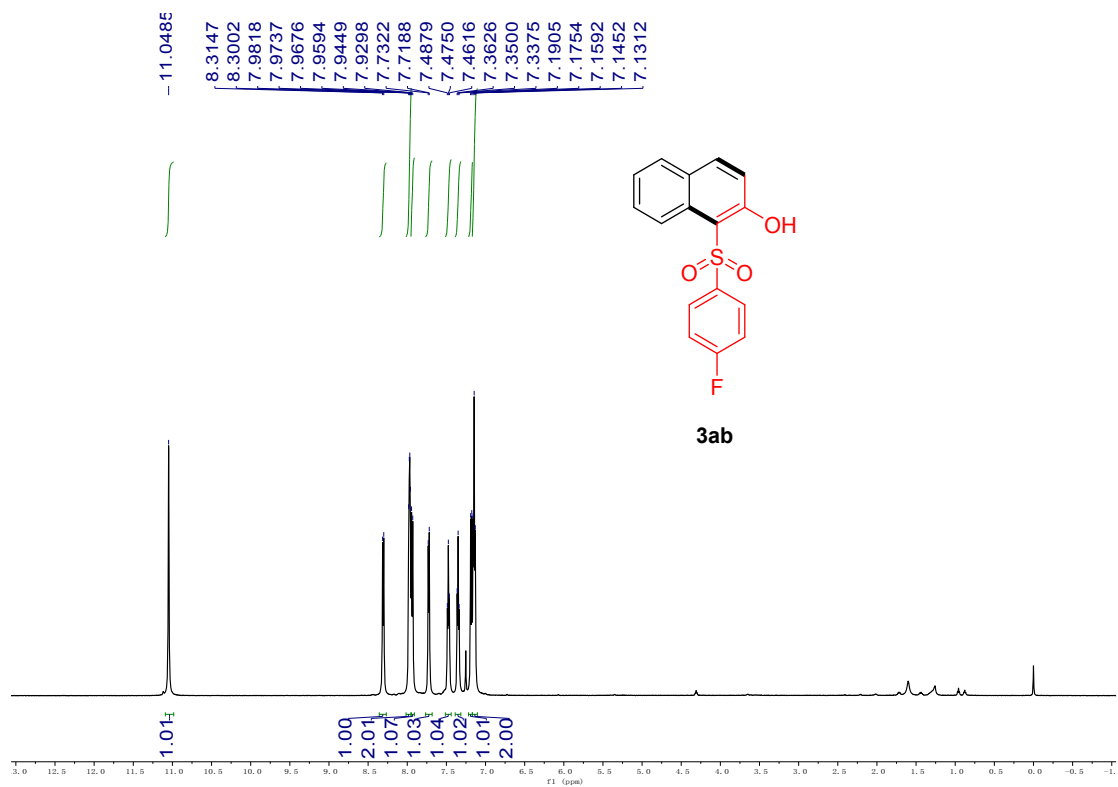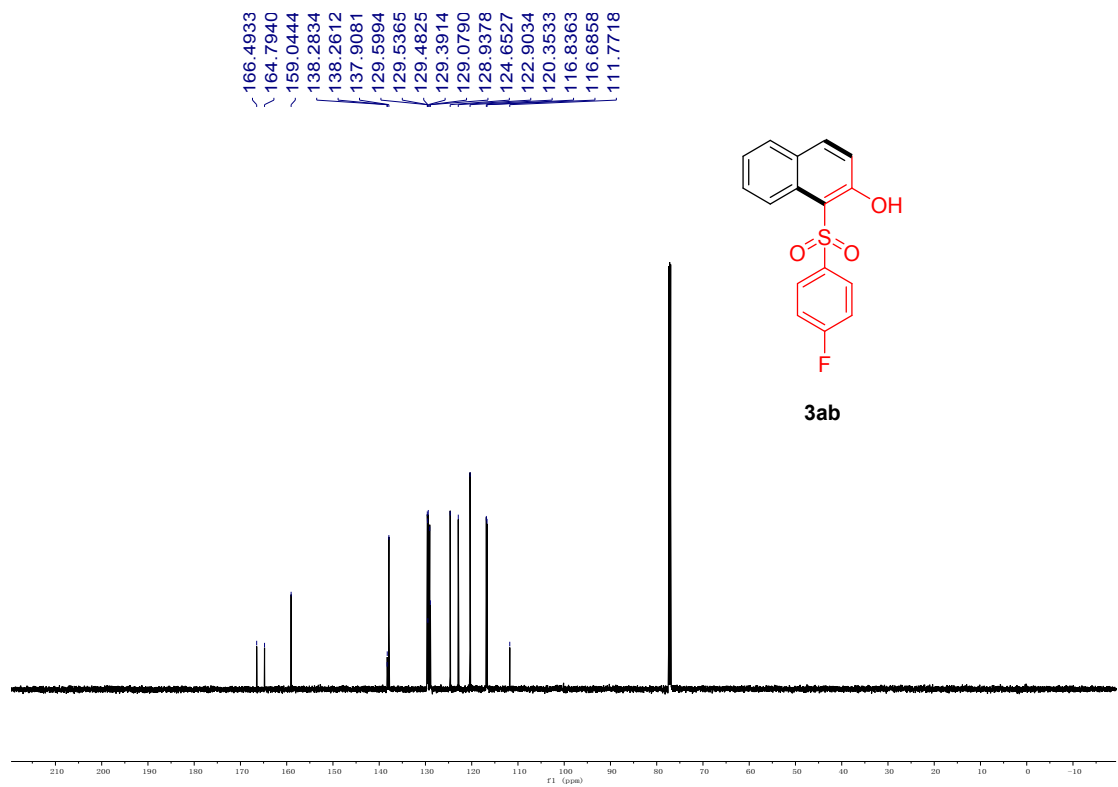

--103.3021

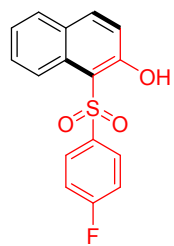

**3ab**

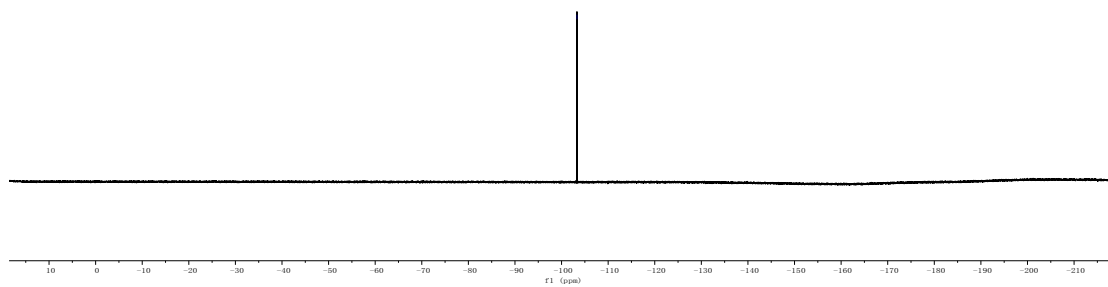

<sup>1</sup>H and <sup>13</sup>C NMR spectra for compound **3ac**

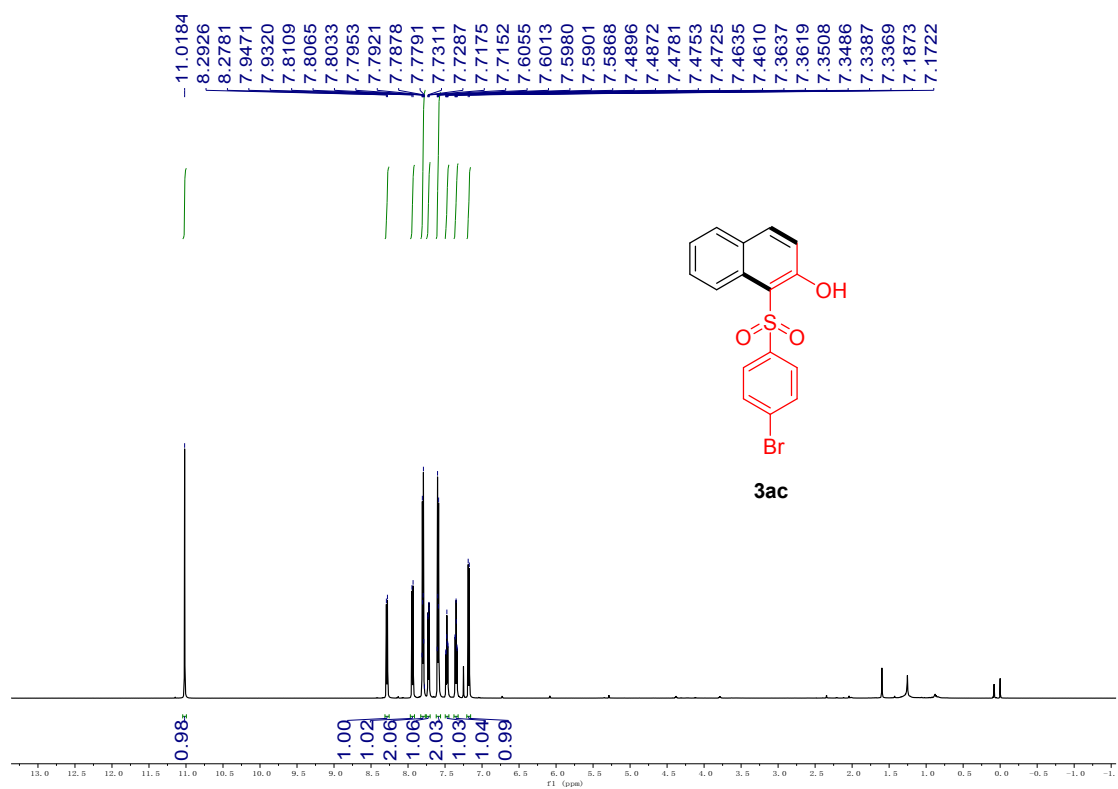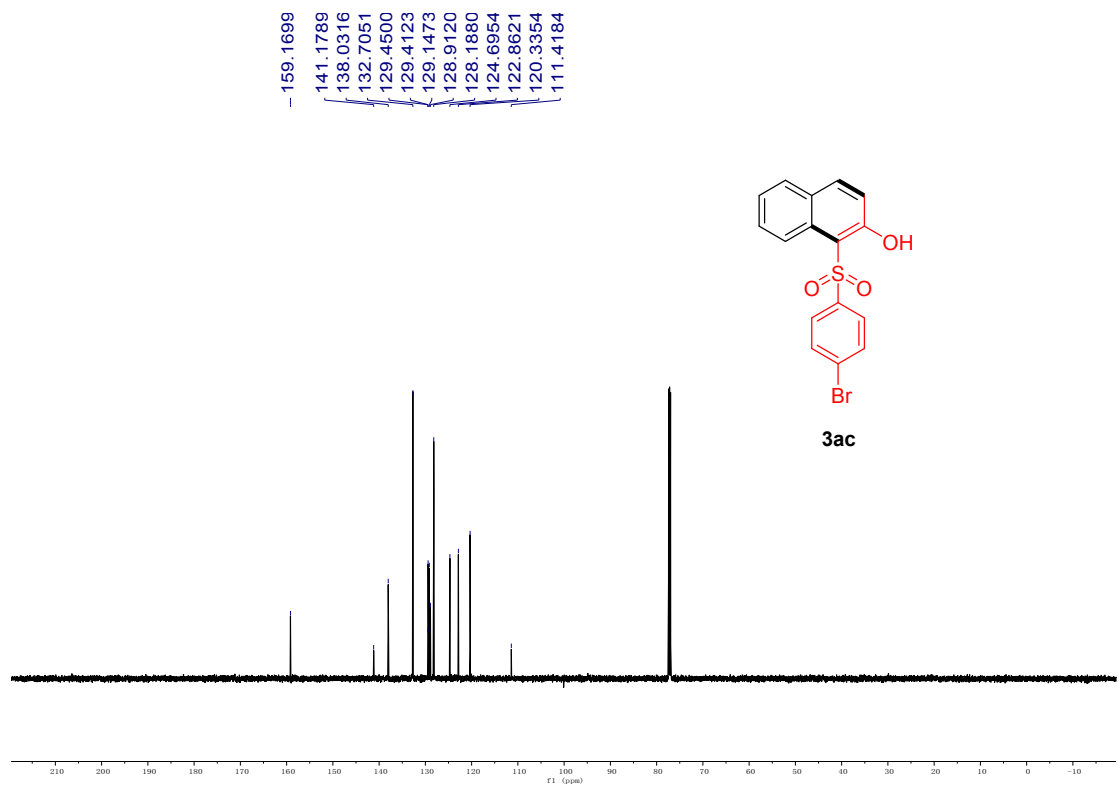



$^1\text{H}$ ,  $^{13}\text{C}$  and  $^{19}\text{F}$  NMR spectra for compound **3ad**

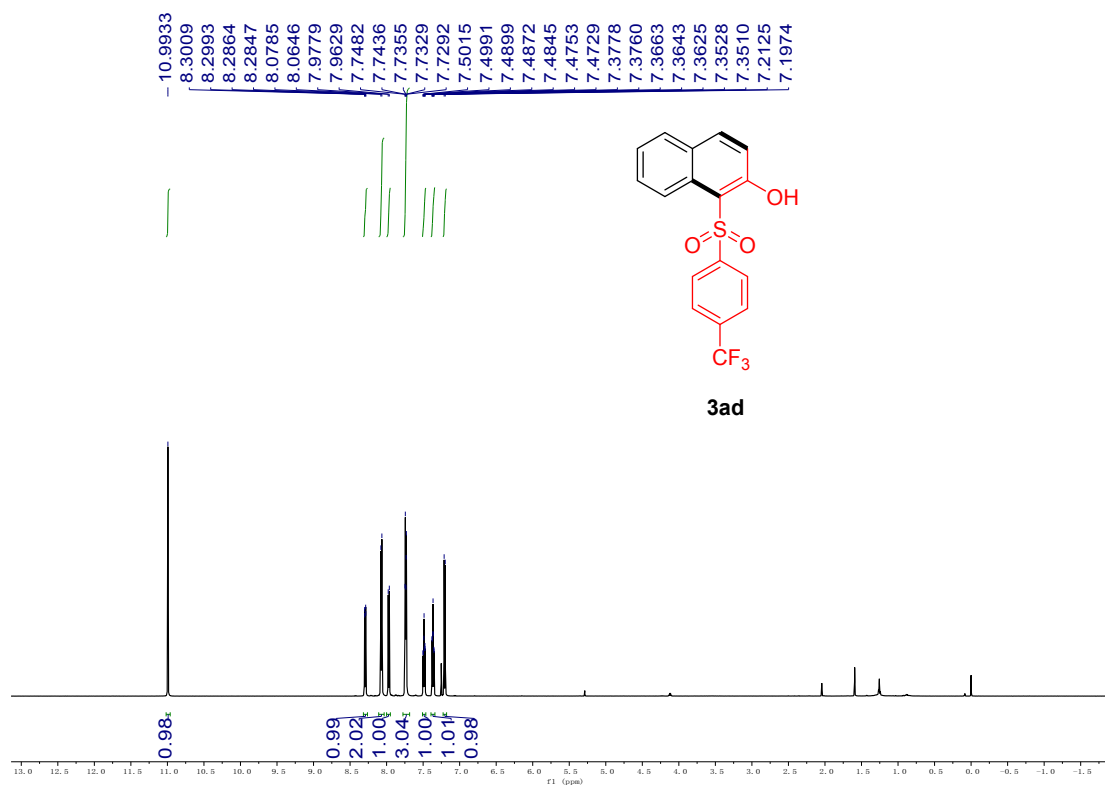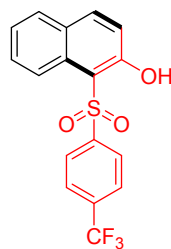

**3ad**

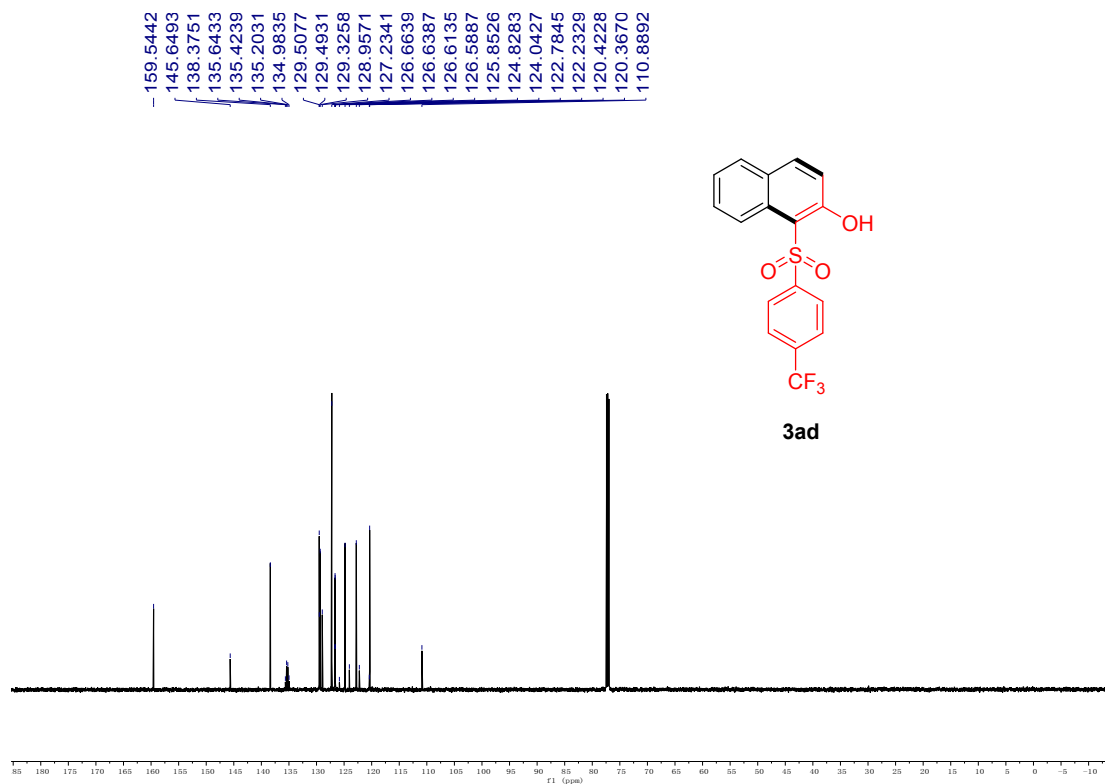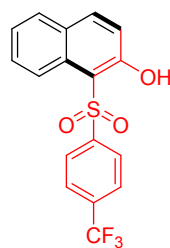

**3ad**

--63.2930

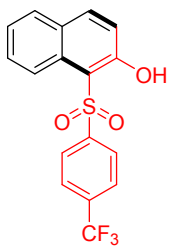

**3ad**

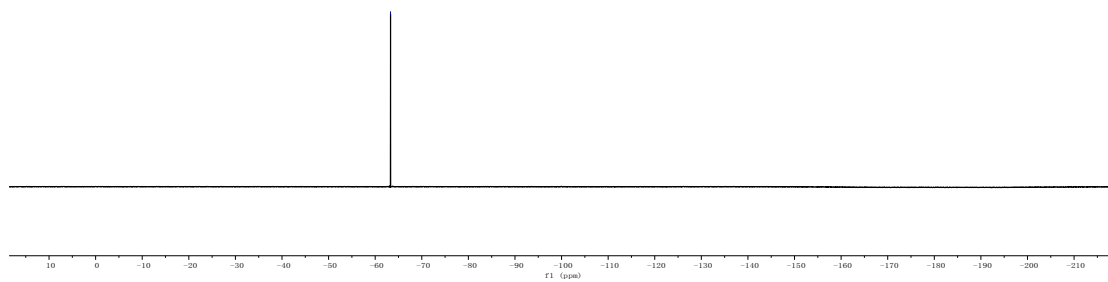

<sup>1</sup>H and <sup>13</sup>C NMR spectra for compound **3ae**

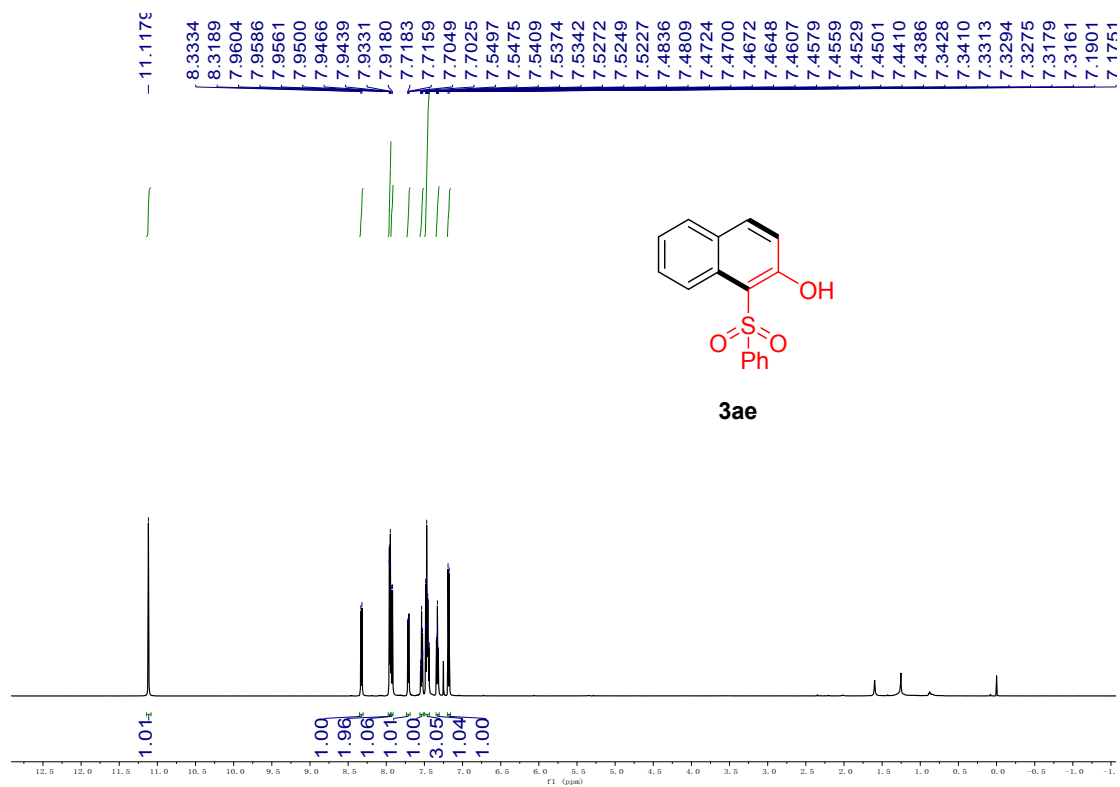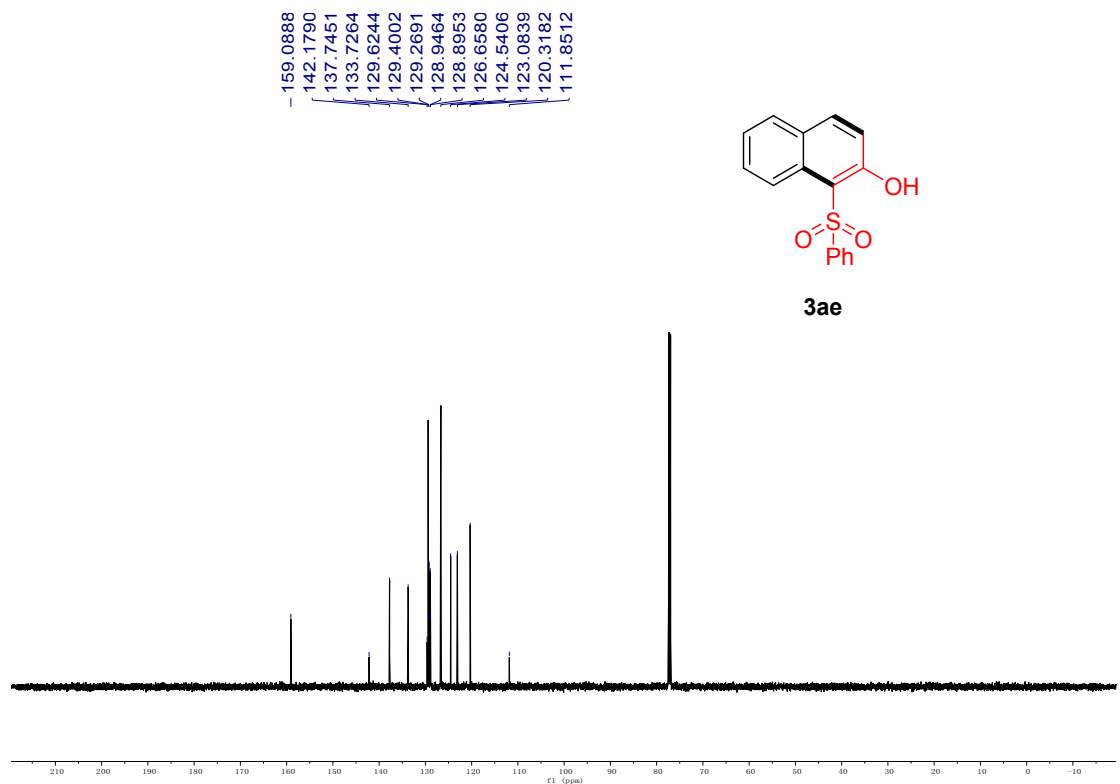

<sup>1</sup>H and <sup>13</sup>C NMR spectra for compound **3af**

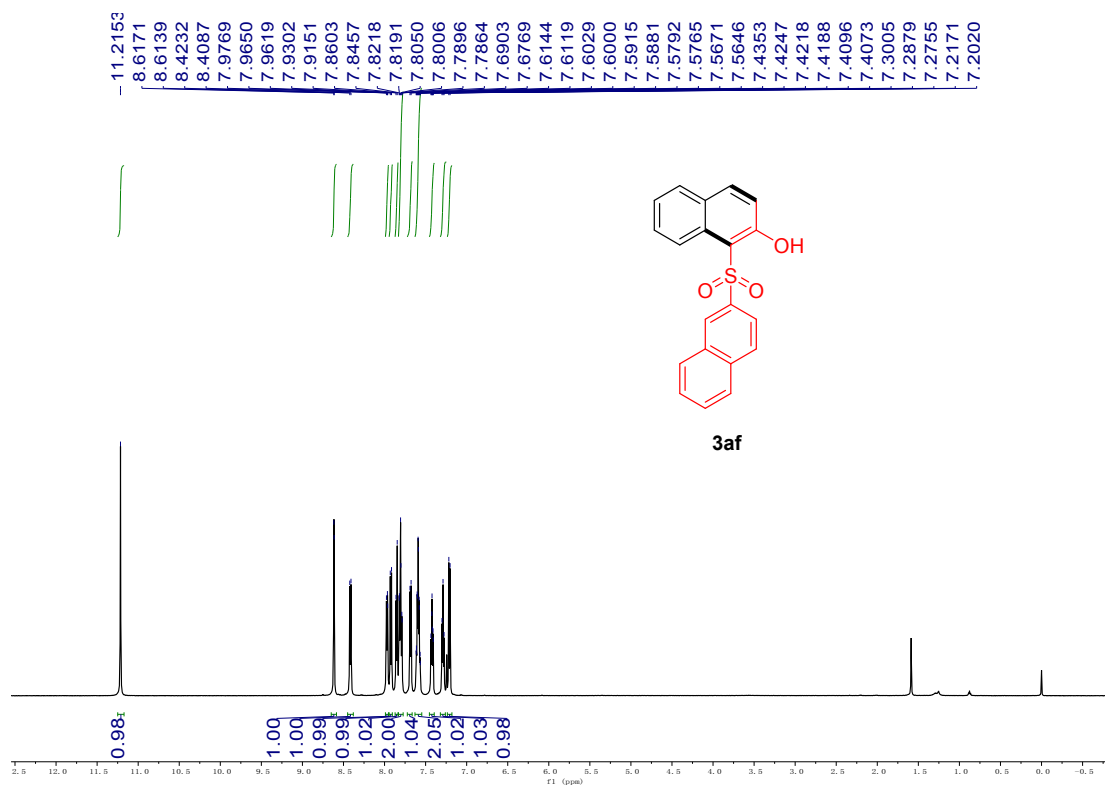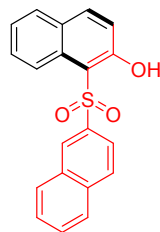

**3af**

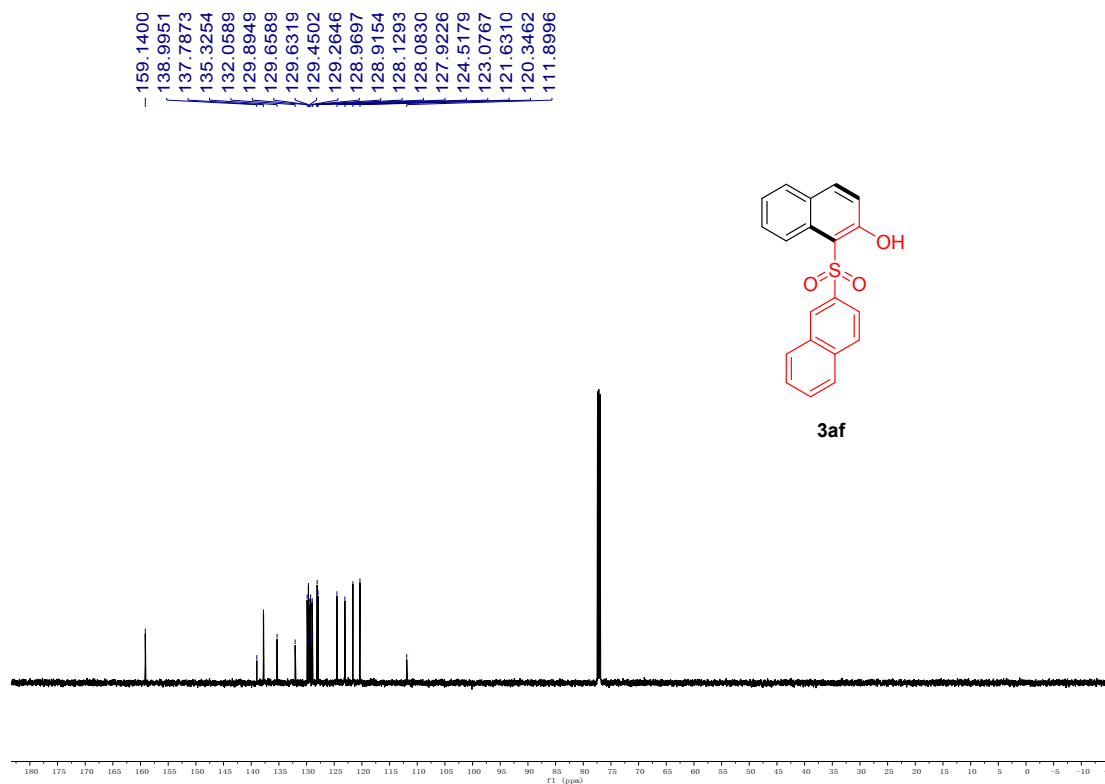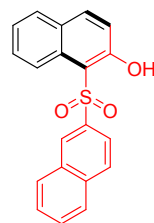

**3af**

<sup>1</sup>H and <sup>13</sup>C NMR spectra for compound **3ag**

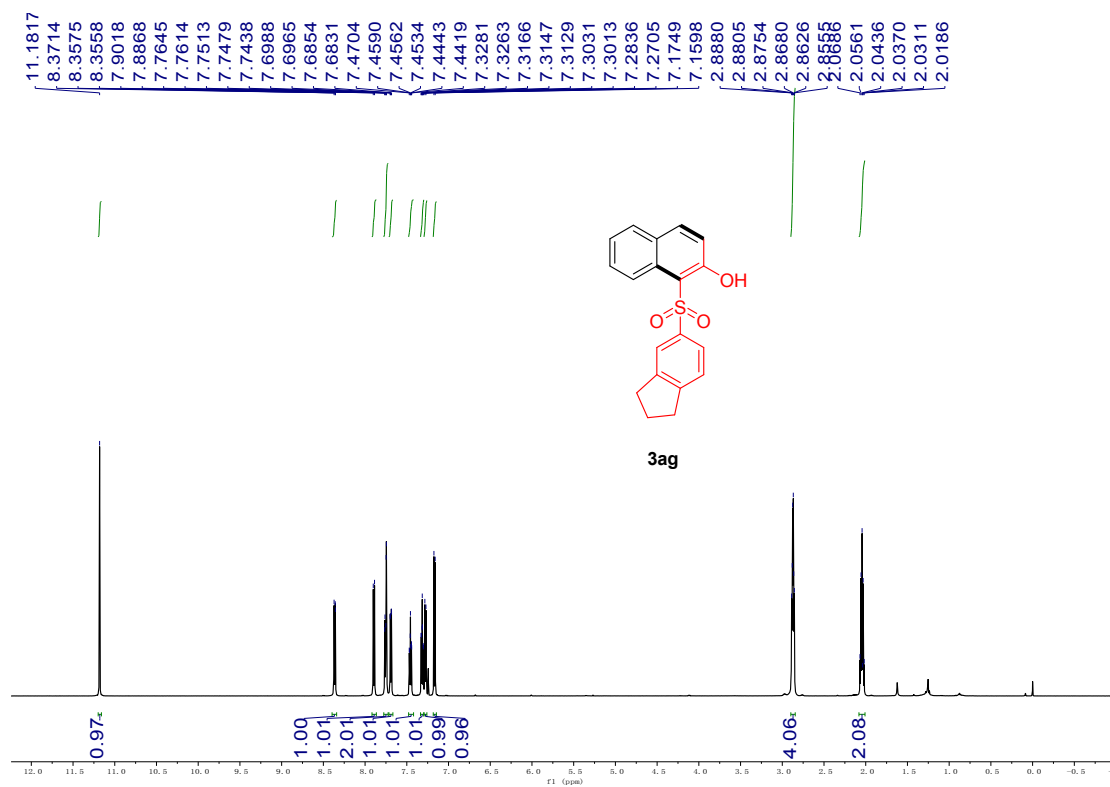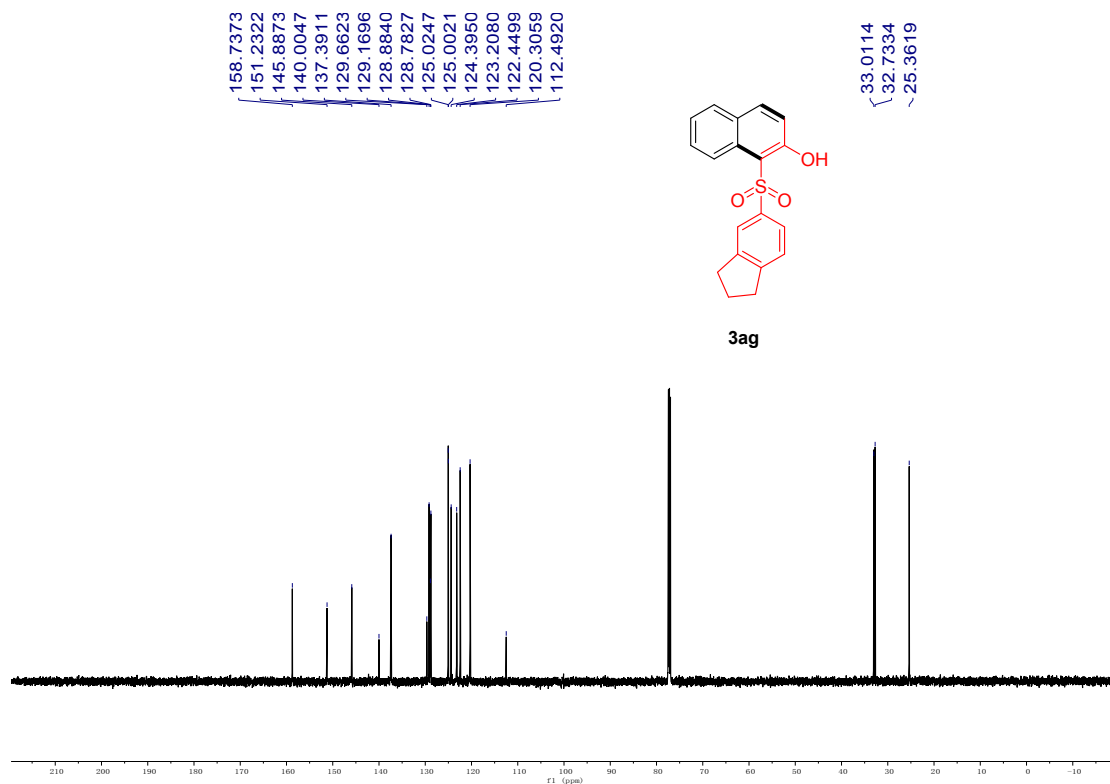

<sup>1</sup>H and <sup>13</sup>C NMR spectra for compound **3ah**

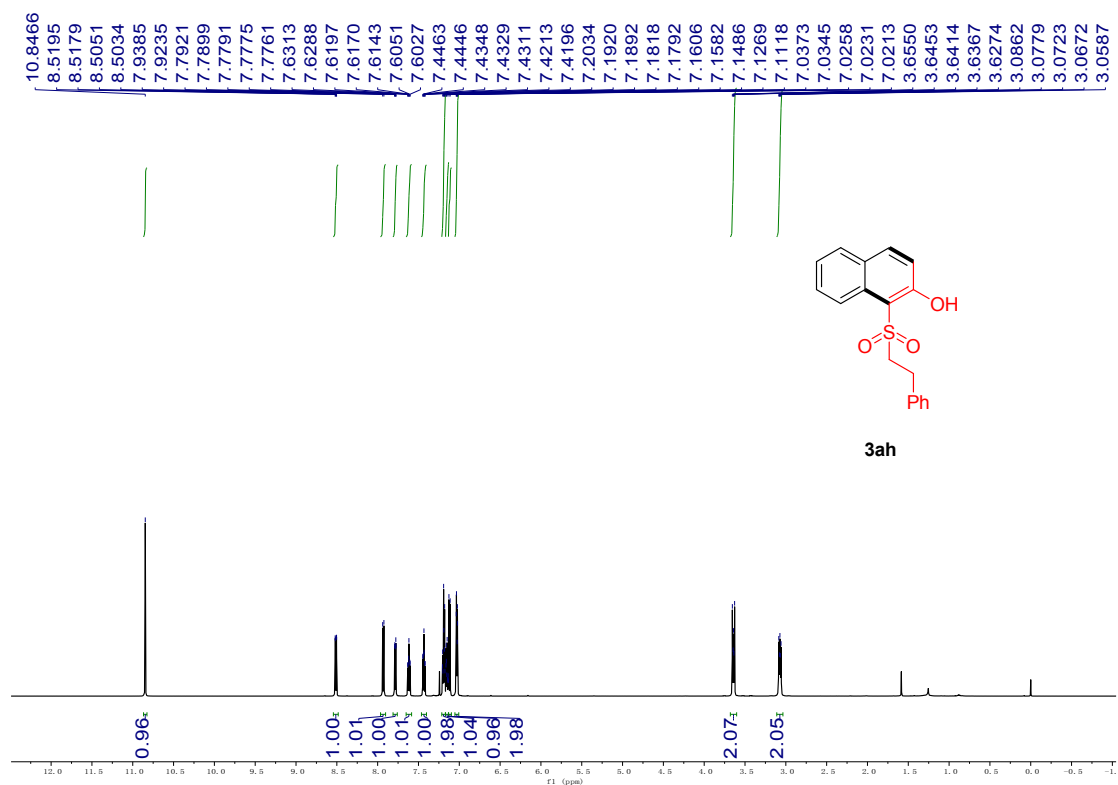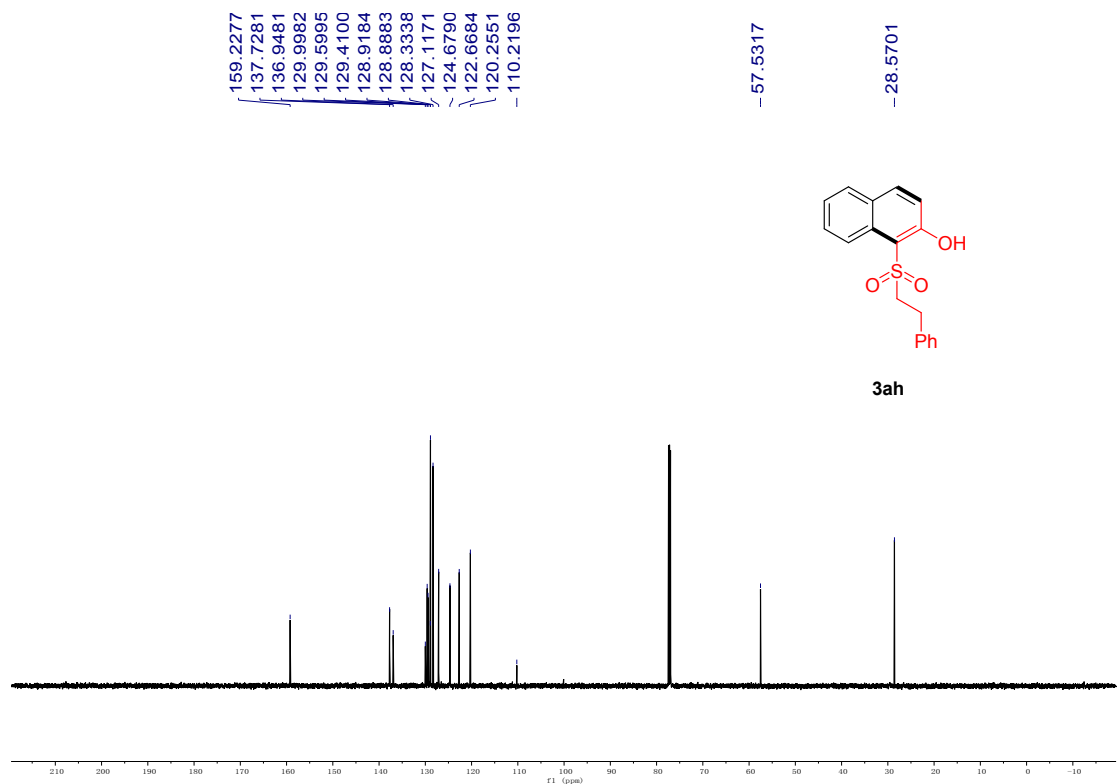

<sup>1</sup>H and <sup>13</sup>C NMR spectra for compound **3ai**

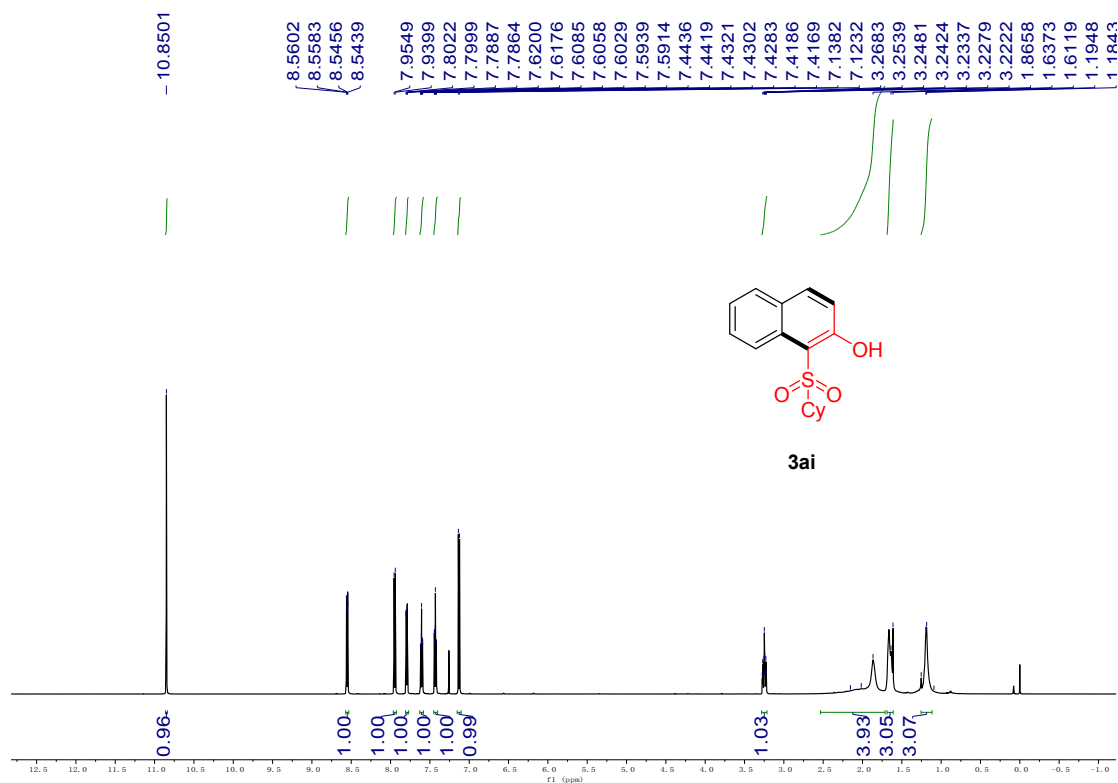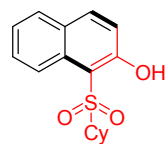

**3ai**

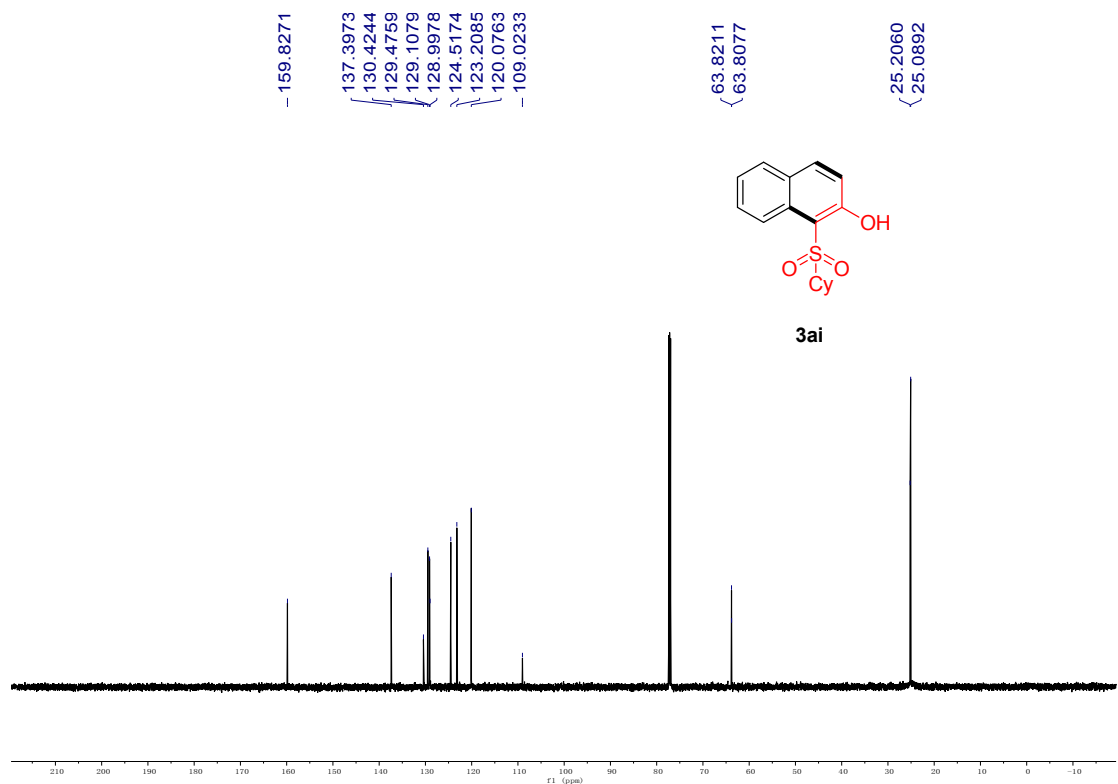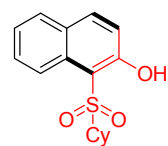

**3ai**

<sup>1</sup>H and <sup>13</sup>C NMR spectra for compound **3aj**

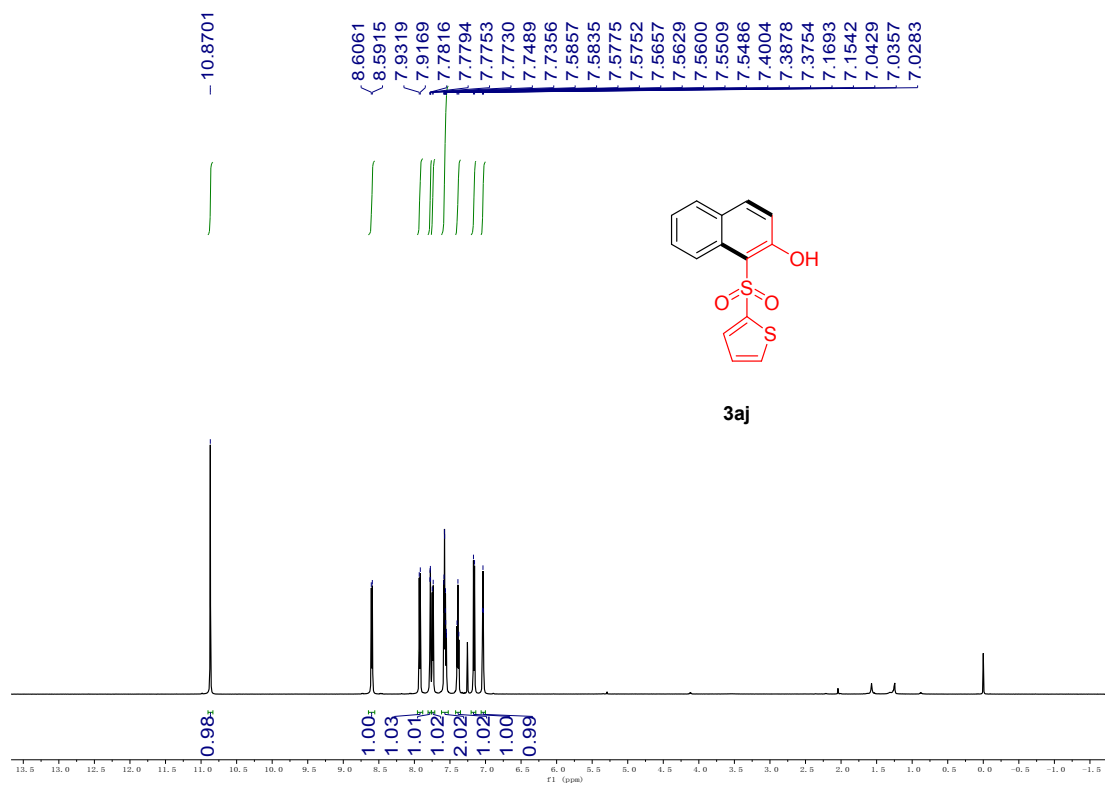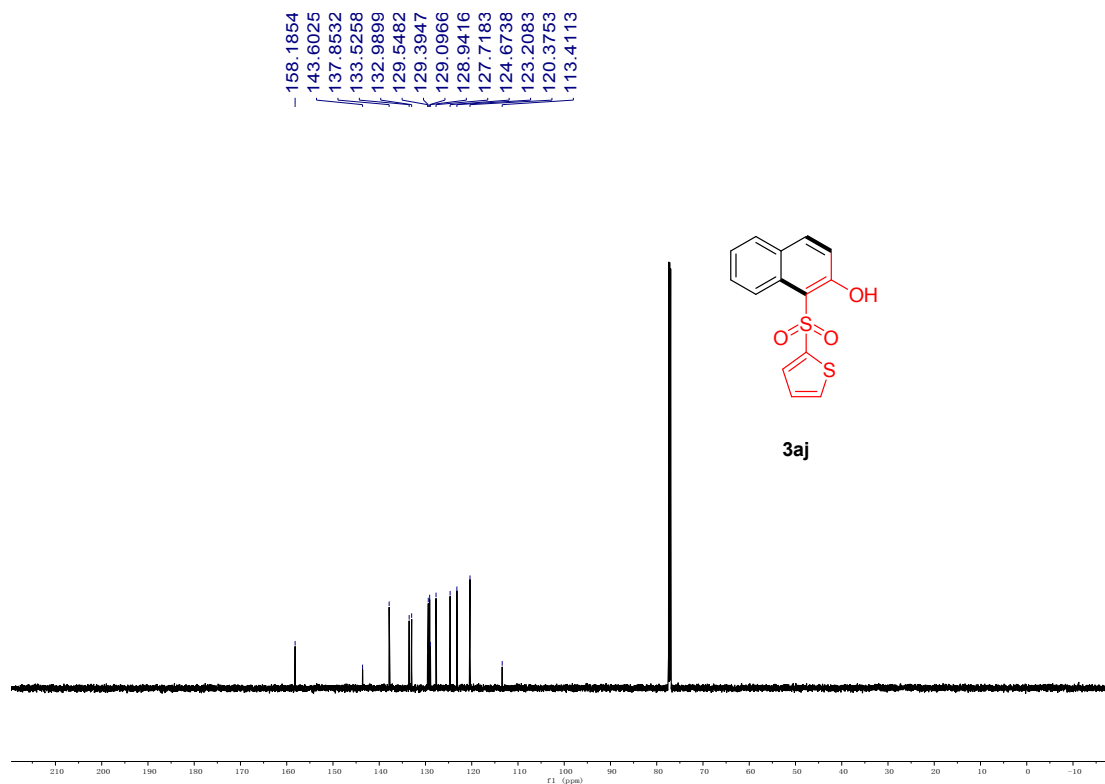



<sup>1</sup>H and <sup>13</sup>C NMR spectra for compound **3ak**

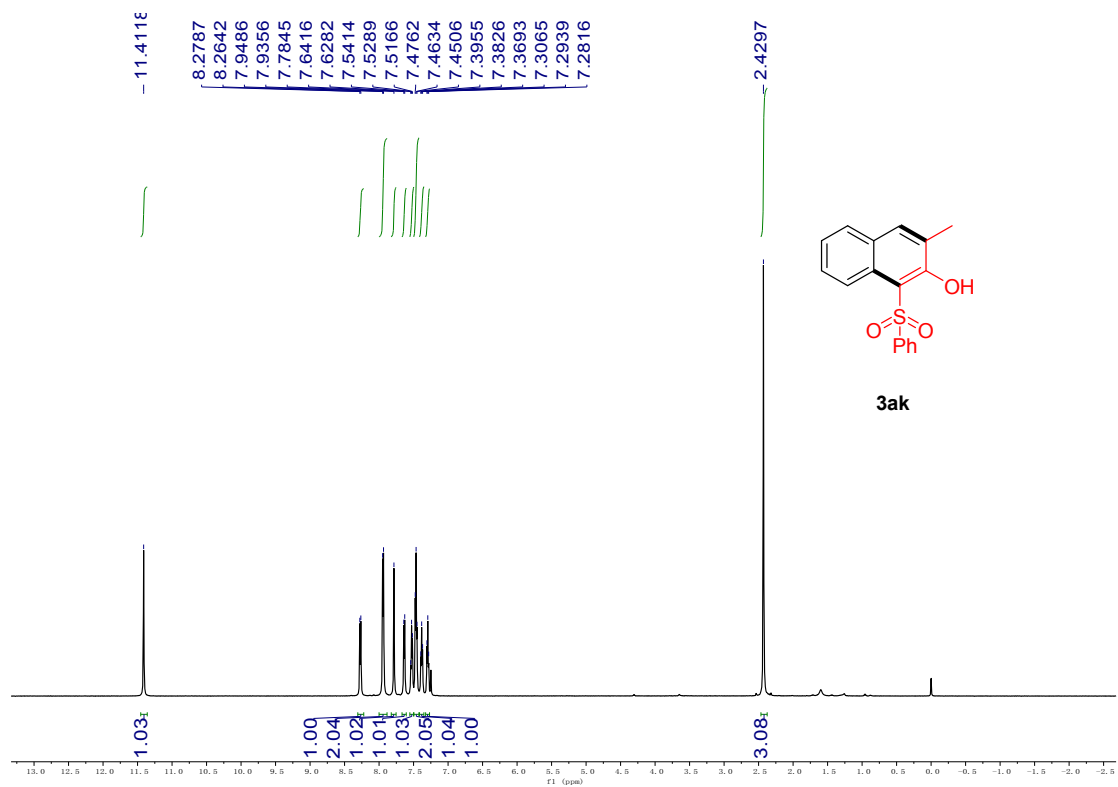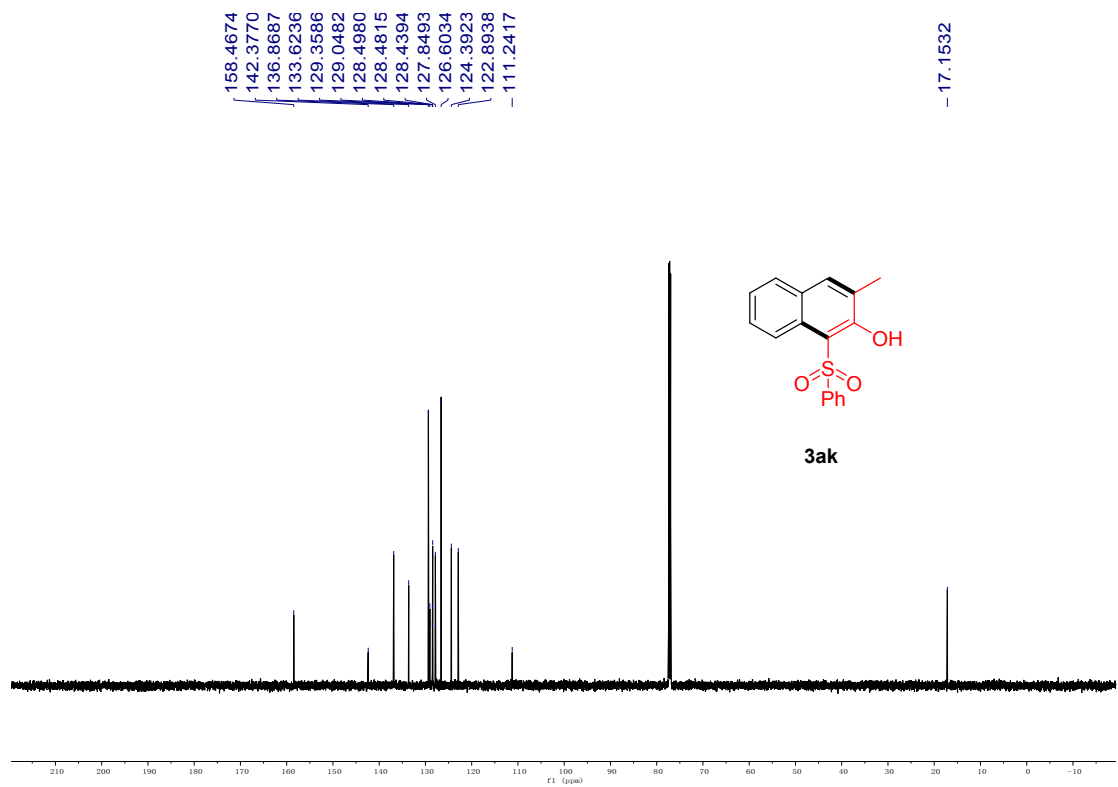

<sup>1</sup>H and <sup>13</sup>C NMR spectra for compound **3al**

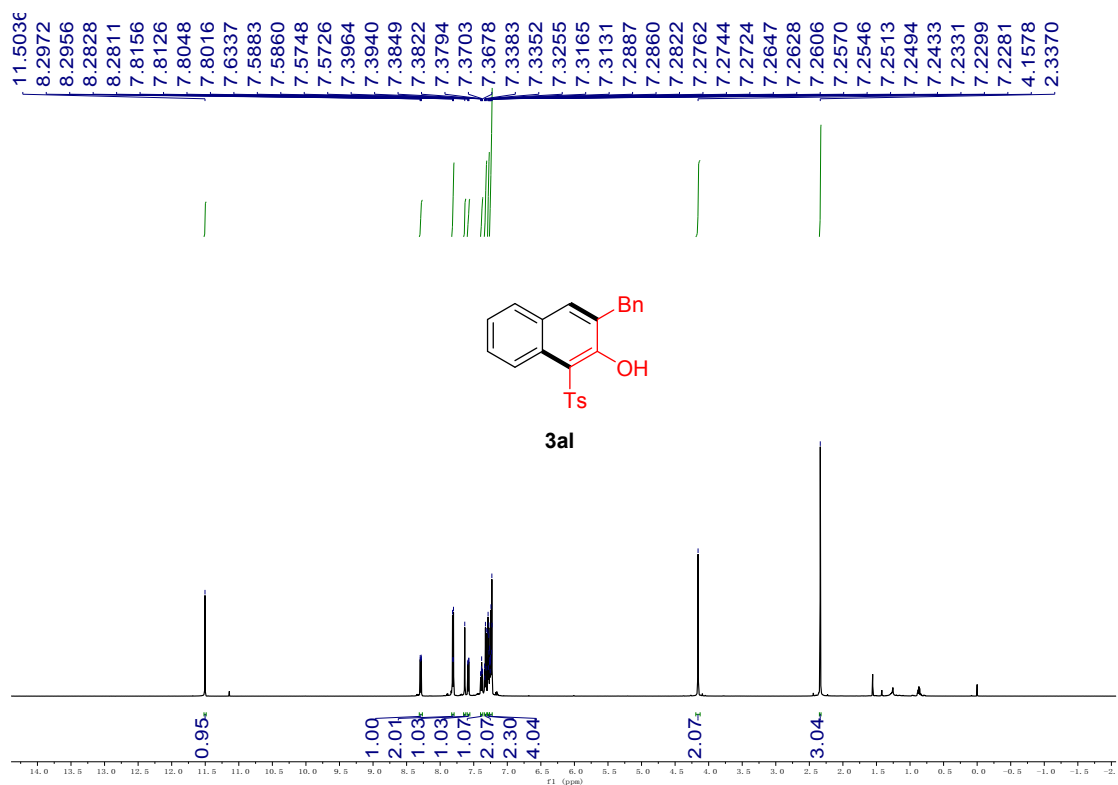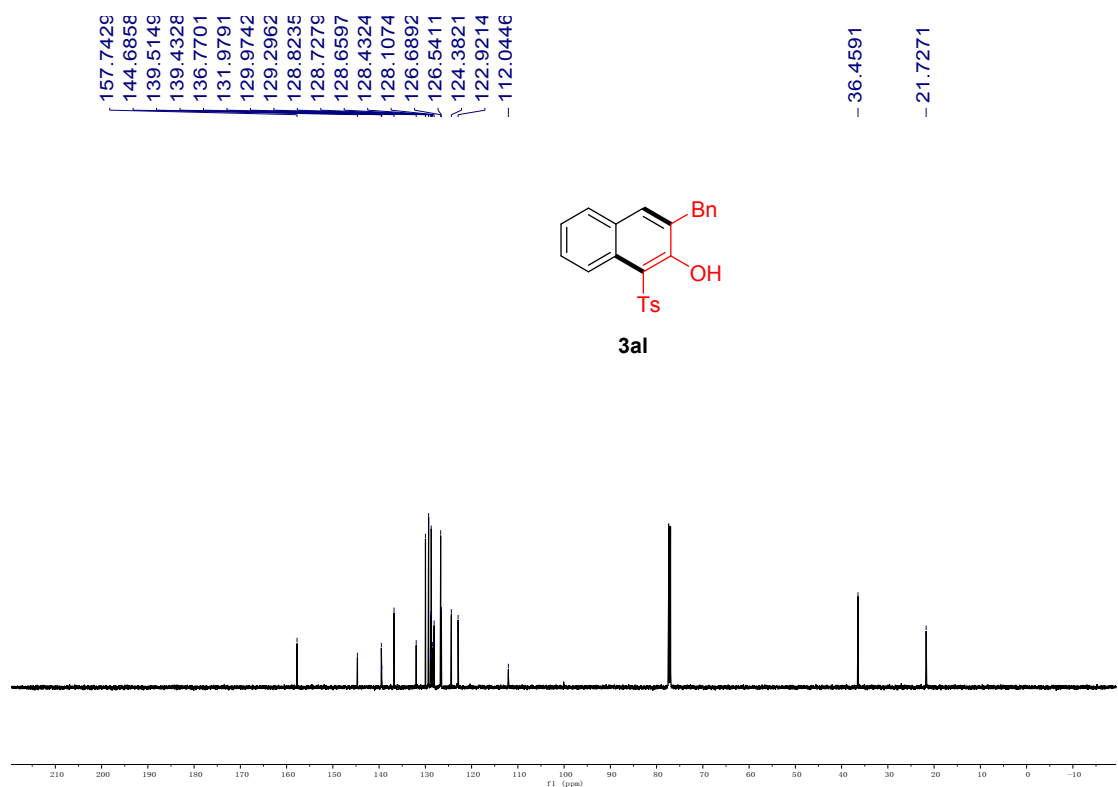

<sup>1</sup>H and <sup>13</sup>C NMR spectra for compound **5**

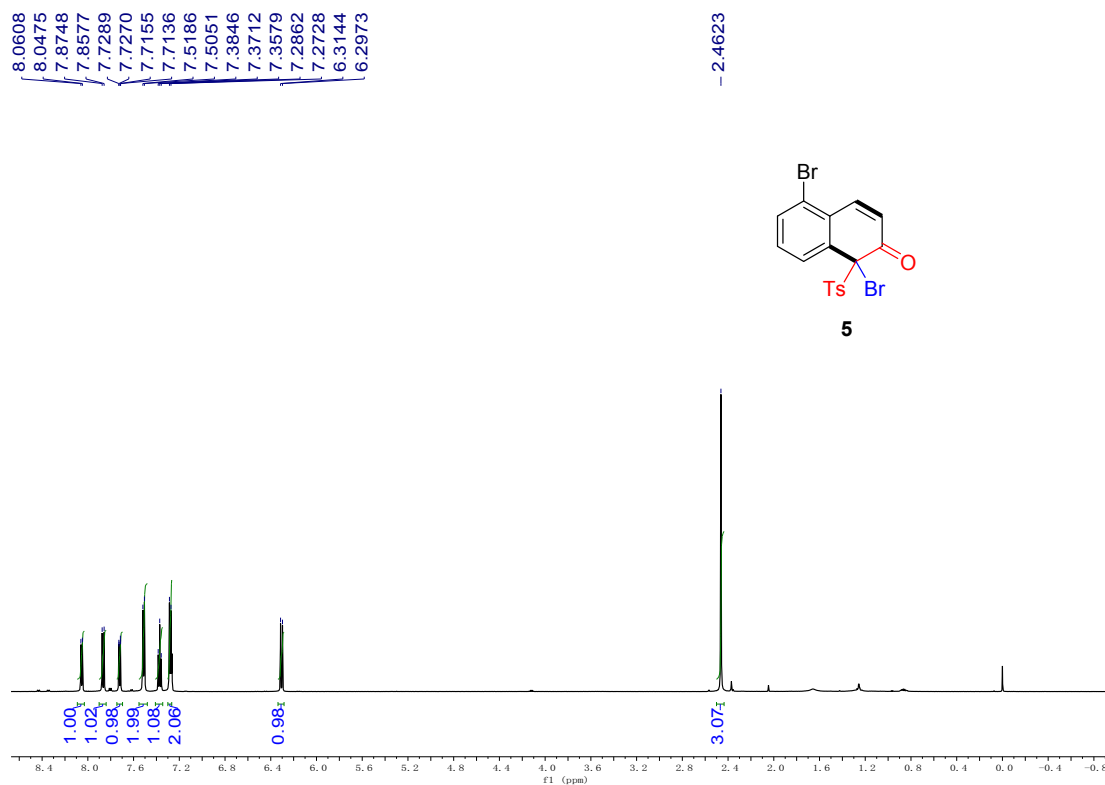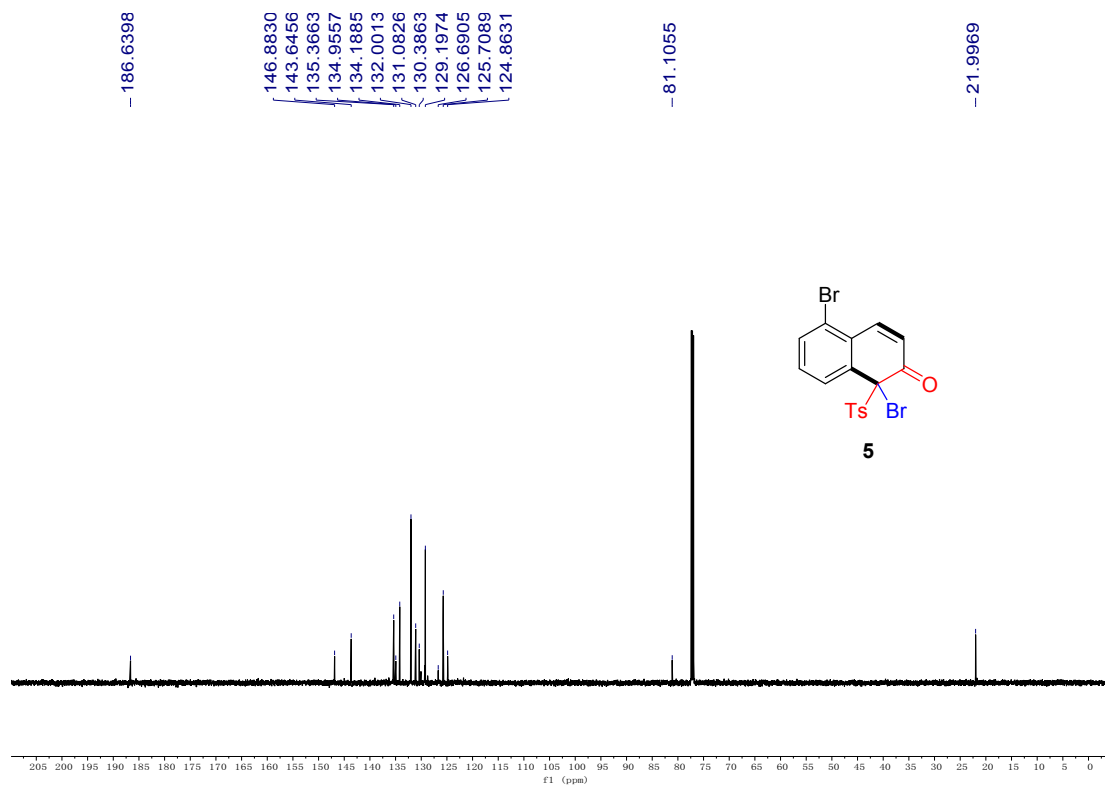

<sup>1</sup>H and <sup>13</sup>C NMR spectra for compound **6**

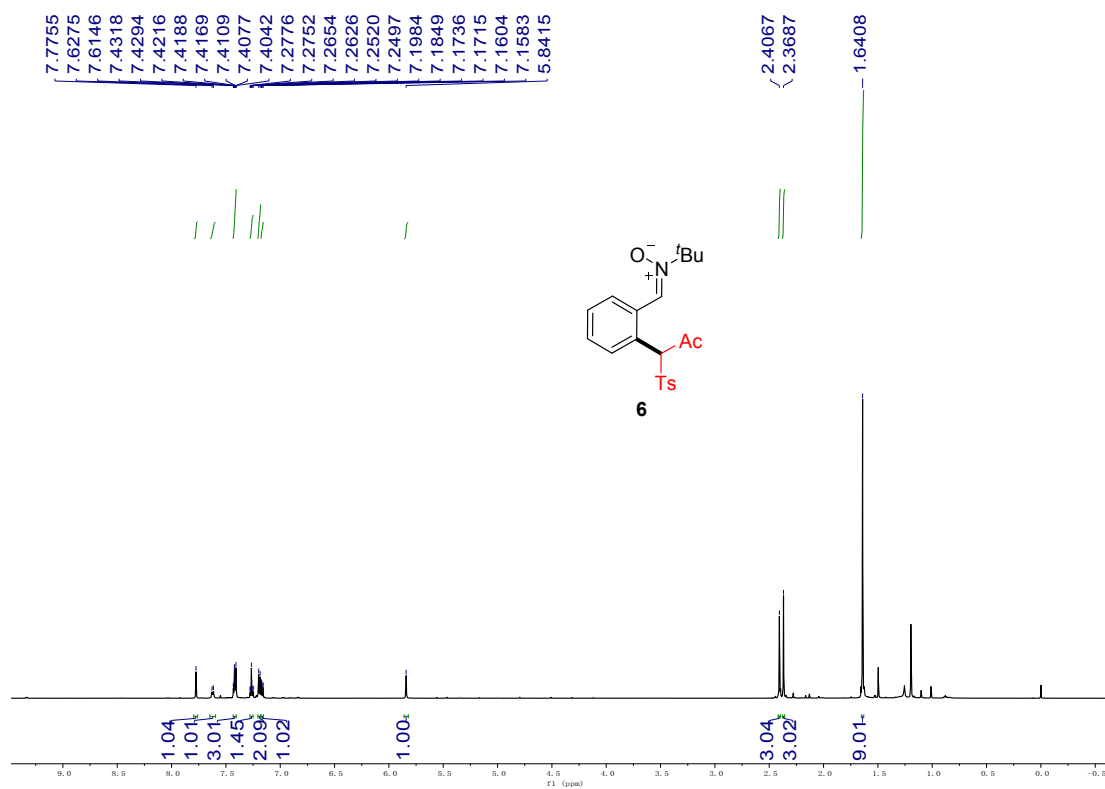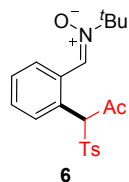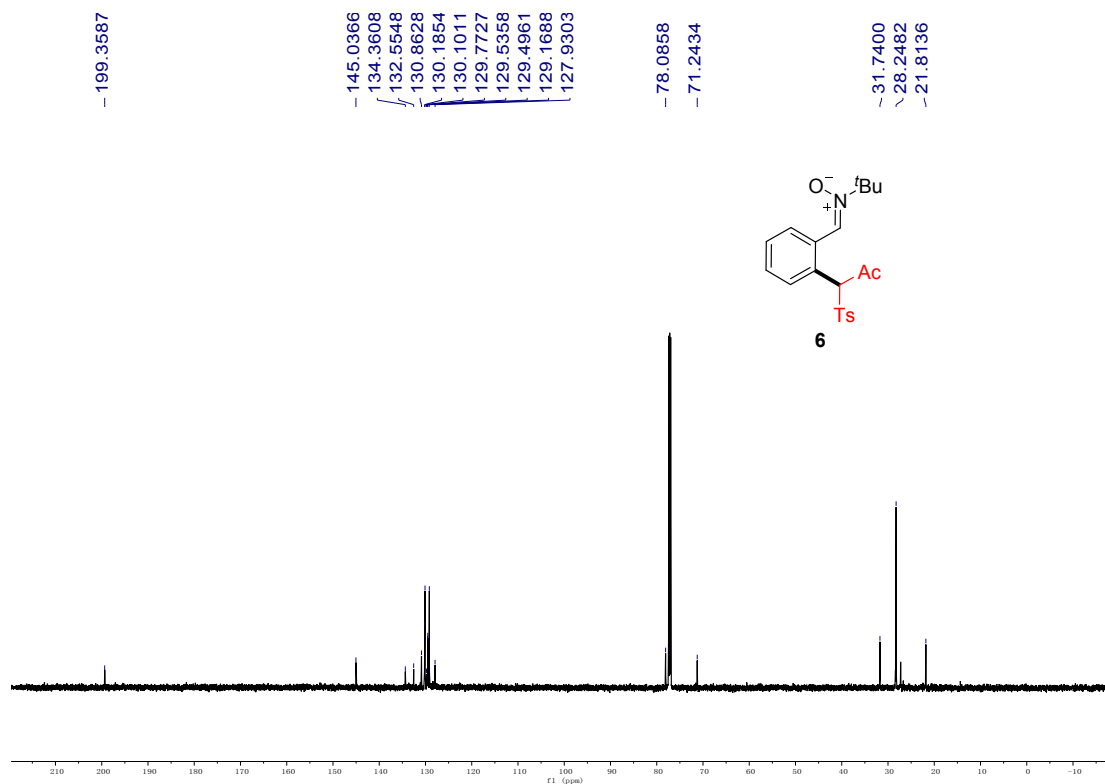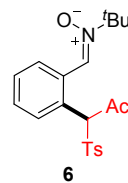

Supplement: c9cc02949d1.pdf [file c9cc02949d1.pdf]
